# Supplementary material
Source: MDPI journal article supplement (https://www.mdpi.com/2073-8994/13/9/1641)
Supplement: s1 [file s1]

# **Supplementary Material**

to the article entitled

## **“The Reactivity of Human and Equin Estrogen-quinones towards Purine Nucleosides”**

Péter Girnt <sup>1</sup>, Zsolt Benedek <sup>1</sup> and Julianna Oláh <sup>\*,1</sup>

<sup>1</sup> Department of Inorganic and Analytical Chemistry, Budapest University of Technology and Economics, Hungary; inorg&anal@mail.bme.hu

\* Correspondence: olah.julianna@vbk.bme.hu

### **Contents**

|                                                                                                |     |
|------------------------------------------------------------------------------------------------|-----|
| Sample input files for Gaussian16 calculations .....                                           | S2  |
| List of reference acids used for pK <sub>a</sub> calculations.....                             | S3  |
| Details of pK <sub>a</sub> calculations.....                                                   | S4  |
| Details of the calculation of Gibbs free energy changes, barriers and effective barriers ..... | S6  |
| Investigation of the effect of temperature (25 °C vs 37 °C) .....                              | S12 |
| Optimized geometries .....                                                                     | S13 |

# 1. Command lines for Gaussian16 calculations

## 1.1. Intermediates (minima on potential energy hypersurface)

```
# B3LYP/6-311++G** opt freq=noraman integral=(acc2e=12)
scf=xqc scrf=cpcm empiricaldispersion=gd3bj
```

## 1.2. Transition states (first order saddle points on potential energy hypersurface)

```
# B3LYP/6-311++G** opt=(TS, calcf, noeigentest) freq=noraman
integral=(acc2e=12) scf=xqc scrf=cpcm
empiricaldispersion=gd3bj
```

(Note: the temperature for thermochemical analysis is set to 25°C by default. For calculations at 37°C, “temperature=310.15” was added to the command line.)

## 2. List of reference acids used for pK<sub>a</sub> calculations

|                                                                                                                                                                                                                                                                                                                                                  |                                                                                                                       |
|--------------------------------------------------------------------------------------------------------------------------------------------------------------------------------------------------------------------------------------------------------------------------------------------------------------------------------------------------|-----------------------------------------------------------------------------------------------------------------------|
| 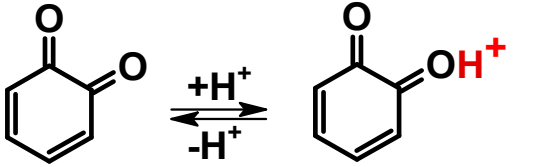 <p><b>pK<sub>a</sub> = -6</b></p>                                                                                                                                                                                                                              |  <p><b>pK<sub>a</sub> = 9.5</b></p> |
| <p><b>ortho-Quinone</b> (left), <b>Catechol</b> (right): T. Palomäki <i>et al.</i>, "Electrochemical reactions of catechol, methylcatechol and dopamine at tetrahedral amorphous carbon (ta-C) thin film electrodes," <i>Diam. Relat. Mater.</i>, vol. 59, pp. 30–39, 2015, doi: 10.1016/j.diamond.2015.09.003.</p>                              |                                                                                                                       |
|  <p><b>pK<sub>a</sub> = 0.1</b></p>                                                                                                                                                                                                                             |                                                                                                                       |
| <p><b>8-Oxo-guanine</b>: S. Raoul and J. Cadet, "Photosensitized reaction of 8-oxo-7,8-dihydro-2'-deoxyguanosine: Identification of 1-(2-deoxy-β-D-erythro-pentofuranosyl)cyanuric acid as the major singlet oxygen oxidation product," <i>J. Am. Chem. Soc.</i>, vol. 118, no. 8, pp. 1892–1898, 1996, doi: 10.1021/ja952347l.</p>              |                                                                                                                       |
|  <p><b>pK<sub>a</sub> = -1.50</b></p>                                                                                                                                                                                                                         |                                                                                                                       |
| <p><b>Adenosine-1,7-H</b>: G. Kampf, L. E. Kapinos, R. Griesser, B. Lippert, and H. Sigel, "Comparison of the acid-base properties of purine derivatives in aqueous solution. Determination of intrinsic proton affinities of various basic sites," <i>J. Chem. Soc. Perkin Trans. 2</i>, no. 7, pp. 1320–1327, 2002, doi: 10.1039/B202023H.</p> |                                                                                                                       |
|  <p><b>pK<sub>a</sub> = 10.3</b></p>                                                                                                                                                                                                                          |                                                                                                                       |
| <p><b>Cyclohexan-1,2-dione</b>: Yannai S.: <i>Dictionary of Food Compounds: Additives, Flavors, and Ingredients</i> (Chapman &amp; Hall/CRC Press, 2004), 225.</p>                                                                                                                                                                               |                                                                                                                       |

### 3. Details of pK<sub>a</sub> calculations

Table S1. Molecular Gibbs free energy (G) of reference acids (“Ref<sub>a</sub>H<sup>+</sup>”) and their conjugate base forms (“Ref<sub>a</sub>”).

| Acid (Ref <sub>a</sub> H <sup>+</sup> ) | G (Ref <sub>a</sub> H <sup>+</sup> )<br>[E <sub>h</sub> ] | G (Ref <sub>a</sub> )<br>[E <sub>h</sub> ] |
|-----------------------------------------|-----------------------------------------------------------|--------------------------------------------|
| AcOH                                    | -229.145592                                               | -228.691086                                |
| ortho-Quinone                           | -381.918633                                               | -381.530258                                |
| Cathecol                                | -382.301626                                               | -382.761271                                |
| 8-Oxo-guanine                           | -618.381938                                               | -617.96352                                 |
| Adenosine-1,7-H                         | -964.538769                                               | -964.130947                                |
| Cyclohexan-1,2-dione                    | -383.933194                                               | -383.456004                                |

Table S2. Molecular Gibbs free energy (G) of initial intermediates (“Int”) of elementary steps, and their conjugate acid forms (“IntH<sup>+</sup>”). The calculation of pK<sub>a</sub> of IntH<sup>+</sup> was based on the following steps (see the “Computational Methods” section of the article for mathematical details):

$$\Delta G_a = G(\text{Int}) + G(\text{Ref}_a\text{H}^+) - G(\text{IntH}^+) - G(\text{Ref}_a)$$

$$pK_a(\text{IntH}^+) = pK_a(\text{Ref}_a\text{H}^+) + 0.732 \Delta G_a$$

( $\Delta G_a$  is to be substituted to the above expression in kcal/mol unit. 1 E<sub>h</sub> = 627.5 kcal/mol)

| Base-acid pair<br>Int / IntH <sup>+</sup>                                           | G(Int)<br>[E <sub>h</sub> ] | G(IntH <sup>+</sup> )<br>[E <sub>h</sub> ] | Reference acid       | $\Delta G_a$<br>[kcal/mol] | pK <sub>a</sub><br>(IntH <sup>+</sup> ) |
|-------------------------------------------------------------------------------------|-----------------------------|--------------------------------------------|----------------------|----------------------------|-----------------------------------------|
| E'-Q(H) / E'-Q(H)H <sup>+</sup>                                                     | -616.174712                 | -616.569411                                | ortho-Quinone        | -3.97                      | -3.1                                    |
| Eq'-Q(H) / Eq'-Q(H)H <sup>+</sup>                                                   | -614.970456                 | -615.363195                                | ortho-Quinone        | -2.74                      | -4.0                                    |
| Eqn'-Q(H) / Eqn'-Q(H)H <sup>+</sup>                                                 | -613.815836                 | -614.218768                                | ortho-Quinone        | -9.13                      | 0.7                                     |
| E'-Q(H)-G <sup>+</sup> R / E'-Q(H)H-G <sup>+</sup> R                                | -1390.080196                | -1390.540276                               | Cyclohexan-1,2-dione | 10.74                      | 2.4                                     |
| Eq'-Q(H)-G <sup>+</sup> R / Eq'-Q(H)H-G <sup>+</sup> R                              | -1388.873884                | -1389.335882                               | Cyclohexan-1,2-dione | 9.53                       | 3.3                                     |
| Eqn'-Q(H)-G <sup>+</sup> R / Eqn'-Q(H)H-G <sup>+</sup> R                            | -1387.717429                | -1388.177421                               | Cyclohexan-1,2-dione | 10.79                      | 2.4                                     |
| E'-Q(H)-A <sup>+</sup> R / E'-Q(H)H-A <sup>+</sup> R                                | -1314.792896                | -1315.254642                               | Cyclohexan-1,2-dione | 9.69                       | 3.2                                     |
| Eq'-Q(H)-A <sup>+</sup> R / Eq'-Q(H)H-A <sup>+</sup> R                              | -1313.587933                | -1314.046569                               | Cyclohexan-1,2-dione | 11.64                      | 1.8                                     |
| Eqn'-Q(H)-A <sup>+</sup> R / Eqn'-Q(H)H-A <sup>+</sup> R                            | -1312.433456                | -1312.874904                               | Cyclohexan-1,2-dione | 11.63                      | 1.8                                     |
| E'-QH-G <sup>+</sup> R' / E'-QH <sub>2</sub> -G <sup>+</sup> R'                     | -1390.104270                | -1390.558782                               | Cathecol             | 3.22                       | 6.9                                     |
| Eq'-QH-G <sup>+</sup> R' / Eq'-QH <sub>2</sub> -G <sup>+</sup> R'                   | -1388.905671                | -1389.356374                               | Cathecol             | 5.61                       | 5.1                                     |
| Eqn'-QH-G <sup>+</sup> R' / Eqn'-QH <sub>2</sub> -G <sup>+</sup> R'                 | -1387.729369                | -1388.176351                               | Cathecol             | 7.95                       | 3.4                                     |
| E'-QH-A <sup>+</sup> R' / E'-QH <sub>2</sub> -A <sup>+</sup> R'                     | -1314.831239                | -1315.283045                               | Cathecol             | 4.92                       | 5.6                                     |
| Eq'-QH-A <sup>+</sup> R' / Eq'-QH <sub>2</sub> -A <sup>+</sup> R'                   | -1313.631532                | -1314.080391                               | Cathecol             | 6.77                       | 4.3                                     |
| Eqn'-QH-A <sup>+</sup> R' / Eqn'-QH <sub>2</sub> -A <sup>+</sup> R'                 | -1312.456155                | -1312.900464                               | Cathecol             | 9.62                       | 2.2                                     |
| E'-QH <sub>2</sub> -G <sup>+</sup> R' / E'-QH <sub>2</sub> -GH <sup>2+</sup> R'     | -1390.558782                | -1390.965880                               | 8-Oxo-guanine        | 7.10                       | -5.1                                    |
| Eq'-QH <sub>2</sub> -G <sup>+</sup> R' / Eq'-QH <sub>2</sub> -GH <sup>2+</sup> R'   | -1389.356374                | -1389.763011                               | 8-Oxo-guanine        | 7.39                       | -5.3                                    |
| Eqn'-QH <sub>2</sub> -G <sup>+</sup> R' / Eqn'-QH <sub>2</sub> -GH <sup>2+</sup> R' | -1388.176351                | -1388.583033                               | 8-Oxo-guanine        | 7.36                       | -5.3                                    |
| E'-QH <sub>2</sub> -A <sup>+</sup> R' / E'-QH <sub>2</sub> -AH <sup>2+</sup> R'     | -1315.283045                | -1315.688204                               | adenosine            | 1.67                       | -2.7                                    |
| Eq'-QH <sub>2</sub> -A <sup>+</sup> R' / Eq'-QH <sub>2</sub> -AH <sup>2+</sup> R'   | -1314.080391                | -1314.487692                               | adenosine            | 0.33                       | -1.7                                    |
| Eqn'-QH <sub>2</sub> -A <sup>+</sup> R' / Eqn'-QH <sub>2</sub> -AH <sup>2+</sup> R' | -1312.900464                | -1313.308422                               | adenosine            | -0.09                      | -1.4                                    |

**Table S3. Protonated fraction ( $x_{\text{prot}}$ ) of initial intermediates of elementary steps, and the value of the corresponding Gibbs free energy correction of  $-RT\ln(x_{\text{prot}})$ . The calculation of  $x_{\text{prot}}$  was based on the following formula (see the “Computational Methods” section of the article for mathematical details):**

$$x_{\text{prot}} = 10^{pK_a(\text{IntH}^+) - 7.2} \text{ or}$$

$$x_{\text{prot}} = 10^{pK_a(\text{IntH}_2^{2+}) + pK_a(\text{IntH}^+) - 14.4} \text{ (in the case of double protonation)}$$

| Protonated intermediate<br>IntH <sup>+</sup> | $x_{\text{prot}}$ | $-RT\ln(x_{\text{prot}})$<br>[kcal/mol] |
|----------------------------------------------|-------------------|-----------------------------------------|
| E'-Q(H)H <sup>+</sup>                        | 5.07E-11          | 14.1                                    |
| Eq'-Q(H)H <sup>+</sup>                       | 6.37E-12          | 15.3                                    |
| Eqn'-Q(H)H <sup>+</sup>                      | 3.07E-07          | 8.9                                     |
| E'-Q(H)H-G <sup>+</sup> R                    | 1.74E-05          | 6.5                                     |
| Eq'-Q(H)H-G <sup>+</sup> R                   | 1.33E-04          | 5.3                                     |
| Eqn'-Q(H)H-G <sup>+</sup> R                  | 1.58E-05          | 6.6                                     |
| E'-Q(H)H-A <sup>+</sup> R                    | 1.02E-04          | 5.4                                     |
| Eq'-Q(H)H-A <sup>+</sup> R                   | 3.78E-06          | 7.4                                     |
| Eqn'-Q(H)H-A <sup>+</sup> R                  | 3.88E-06          | 7.4                                     |
| E'-QH <sub>2</sub> -G <sup>+</sup> R'        | 2.76E-01          | 0.8                                     |
| Eq'-QH <sub>2</sub> -G <sup>+</sup> R'       | 8.64E-03          | 2.8                                     |
| Eqn'-QH <sub>2</sub> -G <sup>+</sup> R'      | 1.71E-04          | 5.1                                     |
| E'-QH <sub>2</sub> -A <sup>+</sup> R'        | 2.69E-02          | 2.1                                     |
| Eq'-QH <sub>2</sub> -A <sup>+</sup> R'       | 1.24E-03          | 4.0                                     |
| Eqn'-QH <sub>2</sub> -A <sup>+</sup> R'      | 1.02E-05          | 6.8                                     |
| E'-QH <sub>2</sub> -GH <sup>2+</sup> R'      | 1.39E-13          | 17.5                                    |
| Eq'-QH <sub>2</sub> -GH <sup>2+</sup> R'     | 2.66E-15          | 19.9                                    |
| Eqn'-QH <sub>2</sub> -GH <sup>2+</sup> R'    | 5.52E-17          | 22.2                                    |
| E'-QH <sub>2</sub> -AH <sup>2+</sup> R'      | 3.21E-12          | 15.7                                    |
| Eq'-QH <sub>2</sub> -AH <sup>2+</sup> R'     | 1.43E-12          | 16.2                                    |
| Eqn'-QH <sub>2</sub> -AH <sup>2+</sup> R'    | 2.34E-14          | 18.6                                    |

## 4. Details of the calculation of Gibbs free energy changes, barriers and effective barriers

Table S4. Molecular Gibbs free energy (G) of common reactant molecules, used for the calculation of Gibbs free energy profiles.

| Molecule                         | G [E <sub>h</sub> ] |
|----------------------------------|---------------------|
| GR'                              | -773.936029         |
| AR'                              | -698.663869         |
| CH <sub>3</sub> COO <sup>-</sup> | -228.691086         |
| CH <sub>3</sub> COOH             | -229.145592         |
| R <sup>+</sup>                   | -231.657713         |

Table S5. Molecular Gibbs free energy (G) of initial intermediate species, transition states and products presented in Figures 7a and 7c.

| Estrogen (Ex') | G(Q(H)) [E <sub>h</sub> ] | G(Q(H)H <sup>+</sup> ) [E <sub>h</sub> ] | G(TS) (Q(H)-GR') [E <sub>h</sub> ] |
|----------------|---------------------------|------------------------------------------|------------------------------------|
| E'             | -616.174712               | -616.569411                              | -1390.074569                       |
| Eq'            | -614.970456               | -615.363195                              | -1388.872944                       |
| Eqn'           | -613.815836               | -614.218768                              | -1387.715806                       |

| Estrogen (Ex') | G(TS) (Q(H)H <sup>+</sup> -GR') [E <sub>h</sub> ] | G (Q(H)-GR') [E <sub>h</sub> ] | G (Q(H)H <sup>+</sup> -GR') [E <sub>h</sub> ] |
|----------------|---------------------------------------------------|--------------------------------|-----------------------------------------------|
| E'             | -1390.504614                                      | -1390.080196                   | -1390.540276                                  |
| Eq'            | -1389.299842                                      | -1388.873884                   | -1389.335882                                  |
| Eqn'           | -1388.149179                                      | -1387.717429                   | -1388.177421                                  |

Table S6. Calculation of relative Gibbs free energies (G<sub>rel</sub>) visualized in Figure 7c. The following formulas were used (see the “Computational Methods” section of the article for mathematical details):

$$G_{\text{rel}}(\text{Ex}'\text{-Q(H)H}^+) = -RT \ln(x_{\text{prot}})$$

$$G_{\text{rel}}(\text{Ex}'\text{-Q(H)-GR}'(\text{TS})) = G(\text{Ex}'\text{-Q(H)-GR}'(\text{TS})) - G(\text{Ex}'\text{-Q(H)}) - G(\text{GR}')$$

$$G_{\text{rel}}(\text{Ex}'\text{-Q(H)H}^+\text{-GR}'(\text{TS})) = G(\text{Ex}'\text{-Q(H)H}^+\text{-GR}'(\text{TS})) - G(\text{Ex}'\text{-Q(H)H}^+) - G(\text{GR}') + G_{\text{rel}}(\text{Ex}'\text{-Q(H)H}^+)$$

$$G_{\text{rel}}(\text{Ex}'\text{-Q(H)-GR}') = G(\text{Ex}'\text{-Q(H)-GR}') - G(\text{Ex}'\text{-Q(H)}) - G(\text{GR}')$$

$$G_{\text{rel}}(\text{Ex}'\text{-Q(H)H}^+\text{-GR}') = G(\text{Ex}'\text{-Q(H)H}^+\text{-GR}') - G(\text{Ex}'\text{-Q(H)H}^+) - G(\text{GR}') + G_{\text{rel}}(\text{Ex}'\text{-Q(H)H}^+)$$

Values of activation Gibbs free energies and effective activation Gibbs free energies relate to G<sub>rel</sub> values as:

$$\Delta G^\ddagger(\text{Ex}'\text{-Q(H)} + \text{GR}') = G_{\text{rel}}(\text{Ex}'\text{-Q(H)-GR}'(\text{TS}))$$

$$\Delta G^\ddagger(\text{Ex}'\text{-Q(H)H}^+ + \text{GR}') = G_{\text{rel}}(\text{Ex}'\text{-Q(H)H}^+\text{-GR}'(\text{TS})) - G_{\text{rel}}(\text{Ex}'\text{-Q(H)H}^+)$$

$$\Delta G_{\text{eff}}^\ddagger(\text{Ex}'\text{-Q(H)H}^+ + \text{GR}') = G_{\text{rel}}(\text{Ex}'\text{-Q(H)H}^+\text{-GR}'(\text{TS}))$$

| Estrogen (Ex') | Gibbs free energy (G <sub>rel</sub> ) relative to the initial state (Ex'-Q(H) + GR'), in kcal/mol |                    |               |                              |          |                         |
|----------------|---------------------------------------------------------------------------------------------------|--------------------|---------------|------------------------------|----------|-------------------------|
|                | Q(H)                                                                                              | Q(H)H <sup>+</sup> | Q(H)-GR' (TS) | Q(H)H <sup>+</sup> -GR' (TS) | Q(H)-GR' | Q(H)H <sup>+</sup> -GR' |
| E'             | 0.0                                                                                               | 14.1               | 22.7          | 14.6                         | 19.2     | -7.8                    |
| Eq'            | 0.0                                                                                               | 15.3               | 21.0          | 15.3                         | 20.5     | -7.7                    |
| Eqn'           | 0.0                                                                                               | 8.9                | 22.6          | 12.4                         | 21.6     | -5.3                    |

**Table S7. Molecular Gibbs free energy (G) of initial intermediate species, transition states and products presented in Figures 7b and 7d.**

| Estrogen<br>(Ex') | G(Q(H))<br>[E <sub>h</sub> ] | G(Q(H)H <sup>+</sup> )<br>[E <sub>h</sub> ] | G(TS)<br>(Q(H)-AR')<br>[E <sub>h</sub> ] |
|-------------------|------------------------------|---------------------------------------------|------------------------------------------|
| E'                | -616.174712                  | -616.569411                                 | -1314.789891                             |
| Eq'               | -614.970456                  | -615.363195                                 | -1313.585704                             |
| Eqn'              | -613.815836                  | -614.218768                                 | -1312.430374                             |

| Estrogen<br>(Ex') | G(TS)<br>(Q(H)H <sup>+</sup> -AR')<br>[E <sub>h</sub> ] | G<br>(Q(H)-AR')<br>[E <sub>h</sub> ] | G<br>(Q(H)H <sup>+</sup> -AR')<br>[E <sub>h</sub> ] |
|-------------------|---------------------------------------------------------|--------------------------------------|-----------------------------------------------------|
| E'                | -1315.227425                                            | -1314.792896                         | -1315.254642                                        |
| Eq'               | -1314.022123                                            | -1313.587933                         | -1314.046569                                        |
| Eqn'              | -1312.874904                                            | -1312.433456                         | -1312.874904                                        |

**Table S8. Calculation of relative Gibbs free energies (G<sub>rel</sub>) visualized in Figure 7d. The following formulas were used (see the “Computational Methods” section of the article for mathematical details):**

$$G_{rel}(Ex'-Q(H)H^+) = -RT\ln(x_{prot})$$

$$G_{rel}(Ex'-Q(H)-AR'(TS)) = G(Ex'-Q(H)-GR'(TS)) - G(Ex'-Q(H)) - G(AR')$$

$$G_{rel}(Ex'-Q(H)H^+-AR'(TS)) = G(Ex'-Q(H)H^+-AR'(TS)) - G(Ex'-Q(H)H^+) - G(AR') + G_{rel}(Ex'-Q(H)H^+)$$

$$G_{rel}(Ex'-Q(H)-AR') = G(Ex'-Q(H)-AR') - G(Ex'-Q(H)) - G(AR')$$

$$G_{rel}(Ex'-Q(H)H^+-AR') = G(Ex'-Q(H)H^+-AR') - G(Ex'-Q(H)H^+) - G(AR') + G_{rel}(Ex'-Q(H)H^+)$$

Values of activation Gibbs free energies and effective activation Gibbs free energies relate to G<sub>rel</sub> values as:

$$\Delta G^\ddagger(Ex'-Q(H) + AR') = G_{rel}(Ex'-Q(H)-AR'(TS))$$

$$\Delta G^\ddagger(Ex'-Q(H)H^+ + AR') = G_{rel}(Ex'-Q(H)H^+-AR'(TS)) - G_{rel}(Ex'-Q(H)H^+)$$

$$\Delta G_{eff}^\ddagger(Ex'-Q(H)H^+ + AR') = G_{rel}(Ex'-Q(H)H^+-AR'(TS))$$

| Estrogen<br>(Ex') | Gibbs free energy (G <sub>rel</sub> ) relative to the initial state (Ex'-Q(H) + AR'), in kcal/mol |                    |                  |                                 |          |                         |
|-------------------|---------------------------------------------------------------------------------------------------|--------------------|------------------|---------------------------------|----------|-------------------------|
|                   | Q(H)                                                                                              | Q(H)H <sup>+</sup> | Q(H)-AR'<br>(TS) | Q(H)H <sup>+</sup> -AR'<br>(TS) | Q(H)-AR' | Q(H)H <sup>+</sup> -AR' |
| E'                | 0.0                                                                                               | 14.1               | 30.6             | 17.6                            | 28.7     | 0.7                     |
| Eq'               | 0.0                                                                                               | 15.3               | 30.5             | 18.4                            | 29.1     | 3.1                     |
| Eqn'              | 0.0                                                                                               | 8.9                | 31.0             | 13.8                            | 29.0     | 3.0                     |

**Table S9. Molecular Gibbs free energy (G) of initial intermediate species, transition states and products presented in Figures 9a and 9c.**

| Estrogen (Ex') | G(Ex'-Q(H)-G <sup>+</sup> R') [E <sub>h</sub> ] | G(Ex'-Q(H)H-G <sup>+</sup> R') [E <sub>h</sub> ] | G(Ex'-Q(H)-G <sup>+</sup> R' (TS)) [E <sub>h</sub> ] |
|----------------|-------------------------------------------------|--------------------------------------------------|------------------------------------------------------|
| E'             | -1390.080196                                    | -1390.540276                                     | -1618.734217                                         |
| Eq'            | -1388.873884                                    | -1389.335882                                     | -1617.531095                                         |
| Eqn'           | -1387.717429                                    | -1388.177421                                     | -1616.371569                                         |

| Estrogen (Ex') | G(Ex'-Q(H)H <sup>+</sup> -GR' (TS)) [E <sub>h</sub> ] | G(Ex'-Q <sup>2</sup> -G <sup>+</sup> R') [E <sub>h</sub> ] | G(Ex'-QH-G <sup>+</sup> R') [E <sub>h</sub> ] |
|----------------|-------------------------------------------------------|------------------------------------------------------------|-----------------------------------------------|
| E'             | -1619.213562                                          | -1389.612021                                               | -1390.104270                                  |
| Eq'            | -1618.010320                                          | -1388.413478                                               | -1388.905671                                  |
| Eqn'           | -1616.848886                                          | -1387.240974                                               | -1387.729369                                  |

**Table S10. Calculation of relative Gibbs free energies (G<sub>rel</sub>) visualized in Figure 9c. The following formulas were used (see the “Computational Methods” section of the article for mathematical details):**

$$G_{rel}(Ex'-Q(H)H-G^+R') = -RT \ln(x_{prot})$$

$$G_{rel}(Ex'-Q(H)-G^+R' (TS)) = G(Ex'-Q(H)-G^+R' (TS)) - G(Ex'-Q(H)-G^+R') - G(acetate)$$

$$G_{rel}(Ex'-Q(H)H^+-GR' (TS)) = G(Ex'-Q(H)H^+-GR' (TS)) - G(Ex'-Q(H)H-G^+R') - G(acetate) + G_{rel}(Ex'-Q(H)H-G^+R')$$

$$G_{rel}(Ex'-Q^2-G^+R') = G(Ex'-Q^2-G^+R') + G(acetic acid) - G(Ex'-Q(H)-G^+R') - G(acetate)$$

$$G_{rel}(Ex'-QH-G^+R') = G(Ex'-QH-G^+R') + G(acetic acid) - G(Ex'-Q(H)H-G^+R') - G(acetate) + G_{rel}(Ex'-Q(H)H-G^+R')$$

Values of activation Gibbs free energies and effective activation Gibbs free energies relate to G<sub>rel</sub> values as:

$$\Delta G^\ddagger(Ex'-Q(H)-G^+R') = G_{rel}(Ex'-Q(H)-G^+R' (TS))$$

$$\Delta G^\ddagger(Ex'-Q(H)H-G^+R') = G_{rel}(Ex'-Q(H)H^+-GR' (TS)) - G_{rel}(Ex'-Q(H)H-G^+R')$$

$$\Delta G^\ddagger_{eff}(Ex'-Q(H)H-G^+R') = G_{rel}(Ex'-Q(H)H^+-GR' (TS))$$

| Estrogen (Ex') | Gibbs free energy (G <sub>rel</sub> ) relative to the initial state, in kcal/mol |                             |                                 |                                  |                                       |                          |
|----------------|----------------------------------------------------------------------------------|-----------------------------|---------------------------------|----------------------------------|---------------------------------------|--------------------------|
|                | Ex'-Q(H)-G <sup>+</sup> R'                                                       | Ex'-Q(H)H-G <sup>+</sup> R' | Ex'-Q(H)-G <sup>+</sup> R' (TS) | Ex'-Q(H)H <sup>+</sup> -GR' (TS) | Ex'-Q <sup>2</sup> -G <sup>+</sup> R' | Ex'-QH-G <sup>+</sup> R' |
| E'             | 0.0                                                                              | 6.5                         | 23.3                            | 17.7                             | 8.6                                   | -5.1                     |
| Eq'            | 0.0                                                                              | 5.3                         | 21.3                            | 15.8                             | 3.7                                   | -9.9                     |
| Eqn'           | 0.0                                                                              | 6.6                         | 23.2                            | 18.9                             | 13.8                                  | 2.5                      |

**Table S11. Molecular Gibbs free energy (G) of initial intermediate species, transition states and products presented in Figures 9b and 9d.**

| Estrogen (Ex') | G(Ex'-Q(H)-A <sup>+</sup> R') [E <sub>h</sub> ] | G(Ex'-Q(H)H-A <sup>+</sup> R') [E <sub>h</sub> ] | G(Ex'-Q(H)-A <sup>+</sup> R' (TS)) [E <sub>h</sub> ] |
|----------------|-------------------------------------------------|--------------------------------------------------|------------------------------------------------------|
| E'             | -1314.792896                                    | -1315.254642                                     | -1543.454288                                         |
| Eq'            | -1313.587933                                    | -1314.046569                                     | -1542.252383                                         |
| Eqn'           | -1312.433456                                    | -1312.874904                                     | -1541.093178                                         |



| Estrogen<br>(Ex') | G(Ex'-Q(H)H <sup>+</sup> -AR'<br>(TS))<br>[E <sub>h</sub> ] | G(Ex'-Q <sup>2</sup> -A <sup>+</sup> R')<br>[E <sub>h</sub> ] | G(Ex'-QH-A <sup>+</sup> R')<br>[E <sub>h</sub> ] |
|-------------------|-------------------------------------------------------------|---------------------------------------------------------------|--------------------------------------------------|
| E'                | -1543.931493                                                | -1314.341581                                                  | -1314.831239                                     |
| Eq'               | -1542.728943                                                | -1313.142571                                                  | -1313.631532                                     |
| Eqn'              | -1541.570192                                                | -1311.969271                                                  | -1312.456155                                     |

**Table S12.** Calculation of relative Gibbs free energies ( $G_{\text{rel}}$ ) visualized in Figure 9d. The following formulas were used (see the “Computational Methods” section of the article for mathematical details):

$$G_{\text{rel}}(\text{Ex}'\text{-Q(H)}^-\text{-A}^+\text{R}') = -RT\ln(x_{\text{prot}})$$

$$G_{\text{rel}}(\text{Ex}'\text{-Q(H)}^-\text{-A}^+\text{R}' \text{ (TS)}) = G(\text{Ex}'\text{-Q(H)}^-\text{-A}^+\text{R}' \text{ (TS)}) - G(\text{Ex}'\text{-Q(H)}^-\text{-A}^+\text{R}') - G(\text{acetate})$$

$$G_{\text{rel}}(\text{Ex}'\text{-Q(H)H}^+\text{-AR}' \text{ (TS)}) = G(\text{Ex}'\text{-Q(H)H}^+\text{-AR}' \text{ (TS)}) - G(\text{Ex}'\text{-Q(H)H}^+\text{-A}^+\text{R}') - G(\text{acetate}) + G_{\text{rel}}(\text{Ex}'\text{-Q(H)H}^+\text{-A}^+\text{R}')$$

$$G_{\text{rel}}(\text{Ex}'\text{-Q}^2\text{-A}^+\text{R}') = G(\text{Ex}'\text{-Q}^2\text{-A}^+\text{R}') + G(\text{acetic acid}) - G(\text{Ex}'\text{-Q(H)}^-\text{-A}^+\text{R}') - G(\text{acetate})$$

$$G_{\text{rel}}(\text{Ex}'\text{-QH-A}^+\text{R}') = G(\text{Ex}'\text{-QH-A}^+\text{R}') + G(\text{acetic acid}) - G(\text{Ex}'\text{-Q(H)H}^+\text{-A}^+\text{R}') - G(\text{acetate}) + G_{\text{rel}}(\text{Ex}'\text{-Q(H)H}^+\text{-A}^+\text{R}')$$

Values of activation Gibbs free energies and effective activation Gibbs free energies relate to  $G_{\text{rel}}$  values as:

$$\Delta G^\ddagger(\text{Ex}'\text{-Q(H)}^-\text{-A}^+\text{R}') = G_{\text{rel}}(\text{Ex}'\text{-Q(H)}^-\text{-A}^+\text{R}' \text{ (TS)})$$

$$\Delta G^\ddagger(\text{Ex}'\text{-Q(H)H}^+\text{-A}^+\text{R}') = G_{\text{rel}}(\text{Ex}'\text{-Q(H)H}^+\text{-AR}' \text{ (TS)}) - G_{\text{rel}}(\text{Ex}'\text{-Q(H)H}^+\text{-A}^+\text{R}')$$

$$\Delta G_{\text{eff}}^\ddagger(\text{Ex}'\text{-Q(H)H}^+\text{-A}^+\text{R}') = G_{\text{rel}}(\text{Ex}'\text{-Q(H)H}^+\text{-AR}' \text{ (TS)})$$

| Estrogen<br>(Ex') | Gibbs free energy ( $G_{\text{rel}}$ ) relative to the initial state, in kcal/mol |                    |                  |                                 |          |                         |
|-------------------|-----------------------------------------------------------------------------------|--------------------|------------------|---------------------------------|----------|-------------------------|
|                   | Q(H)                                                                              | Q(H)H <sup>+</sup> | Q(H)-AR'<br>(TS) | Q(H)H <sup>+</sup> -AR'<br>(TS) | Q(H)-AR' | Q(H)H <sup>+</sup> -AR' |
| E'                | 0.0                                                                               | 5.5                | 18.6             | 14.4                            | -2.0     | -14.0                   |
| Eq'               | 0.0                                                                               | 7.4                | 16.7             | 12.9                            | -5.7     | -17.3                   |
| Eqn'              | 0.0                                                                               | 7.4                | 19.7             | 15.6                            | 6.1      | -4.2                    |

**Table S13.** Molecular Gibbs free energy ( $G$ ) of initial intermediate species, transition states and products presented in Figures 10a, 10c and 10e.

| Estrogen<br>(Ex') | G(Ex'-QH-G <sup>+</sup> R')<br>[E <sub>h</sub> ] | G(Ex'-QH <sub>2</sub> -G <sup>+</sup> R')<br>[E <sub>h</sub> ] | G(Ex'-QH <sub>2</sub> -GH <sup>2+</sup> R')<br>[E <sub>h</sub> ] |
|-------------------|--------------------------------------------------|----------------------------------------------------------------|------------------------------------------------------------------|
| E'                | -1390.104270                                     | -1390.558782                                                   | -1390.965880                                                     |
| Eq'               | -1388.905671                                     | -1389.356374                                                   | -1389.763011                                                     |
| Eqn'              | -1387.729369                                     | -1388.176351                                                   | -1388.583033                                                     |

| Estrogen<br>(Ex') | G(Ex'-QH <sub>2</sub> -GH <sup>2+</sup> R'<br>(TS))<br>[E <sub>h</sub> ] | G(Ex'-QH-G + R <sup>+</sup> )<br>[E <sub>h</sub> ] | G(Ex'-QH <sub>2</sub> -G + R <sup>+</sup> )<br>[E <sub>h</sub> ] | G(Ex'-QH <sub>2</sub> -GH <sup>+</sup> + R <sup>+</sup> )<br>[E <sub>h</sub> ] |
|-------------------|--------------------------------------------------------------------------|----------------------------------------------------|------------------------------------------------------------------|--------------------------------------------------------------------------------|
| E'                | -1390.950254                                                             | -1158.415247                                       | -1158.876356                                                     | -1159.304321                                                                   |
| Eq'               | -1389.745820                                                             | -1157.215581                                       | -1157.672776                                                     | -1158.100915                                                                   |
| Eqn'              | -1388.566870                                                             | -1156.042410                                       | -1156.495368                                                     | -1156.921690                                                                   |

**Table S14. Calculation of relative Gibbs free energies ( $G_{\text{rel}}$ ) visualized in Figures 10c and 10e. The following formulas were used (see the “Computational Methods” section of the article for mathematical details):**

$$G_{\text{rel}}(\text{Ex}'\text{-QH}_2\text{-G}^+\text{R}') = -RT\ln(x_{\text{prot}})$$

$$G_{\text{rel}}(\text{Ex}'\text{-QH}_2\text{-GH}^{2+}\text{R}') = -RT\ln(x_{\text{prot}})$$

$$G_{\text{rel}}(\text{Ex}'\text{-QH}_2\text{-GH}^{2+}\text{R}' \text{ (TS)}) = G(\text{Ex}'\text{-QH}_2\text{-GH}^{2+}\text{R}' \text{ (TS)}) - G(\text{Ex}'\text{-QH}_2\text{-GH}^{2+}\text{R}') + G_{\text{rel}}(\text{Ex}'\text{-QH}_2\text{-GH}^{2+}\text{R}')$$

$$G_{\text{rel}}(\text{Ex}'\text{-QH-G} + \text{R}^{++}) = G(\text{Ex}'\text{-QH-G} + \text{R}^{++}) - G(\text{Ex}'\text{-QH-G}^+\text{R}')$$

$$G_{\text{rel}}(\text{Ex}'\text{-QH}_2\text{-G} + \text{R}^{++}) = G(\text{Ex}'\text{-QH}_2\text{-G} + \text{R}^{++}) - G(\text{Ex}'\text{-QH}_2\text{-G}^+\text{R}') + G_{\text{rel}}(\text{Ex}'\text{-QH}_2\text{-G}^+\text{R}')$$

$$G_{\text{rel}}(\text{Ex}'\text{-QH}_2\text{-GH}^+ + \text{R}^{++}) = G(\text{Ex}'\text{-QH}_2\text{-GH}^+ + \text{R}^{++}) - G(\text{Ex}'\text{-QH}_2\text{-GH}^{2+}\text{R}') + G_{\text{rel}}(\text{Ex}'\text{-QH}_2\text{-GH}^{2+}\text{R}')$$

Values of activation Gibbs free energies and effective activation Gibbs free energies relate to  $G_{\text{rel}}$  values as:

$$\Delta G^\ddagger(\text{Ex}'\text{-QH-G} + \text{R}^{++}) = G_{\text{rel}}(\text{Ex}'\text{-QH-G} + \text{R}^{++}) - G_{\text{rel}}(\text{Ex}'\text{-QH-G}^+\text{R}')$$

$$\Delta G^\ddagger(\text{Ex}'\text{-QH}_2\text{-G}^+\text{R}') = G_{\text{rel}}(\text{Ex}'\text{-QH}_2\text{-G} + \text{R}^{++}) - G_{\text{rel}}(\text{Ex}'\text{-QH}_2\text{-G}^+\text{R}')$$

$$\Delta G_{\text{eff}}^\ddagger(\text{Ex}'\text{-Q(H)H-G}^+\text{R}') = G_{\text{rel}}(\text{Ex}'\text{-QH}_2\text{-GH}^{2+}\text{R}' \text{ (TS)}) - G_{\text{rel}}(\text{Ex}'\text{-QH}_2\text{-GH}^+ + \text{R}^{++})$$

| Estrogen<br>(Ex') | Gibbs free energy ( $G_{\text{rel}}$ ) relative to the initial state, in kcal/mol |                                        |                                          |
|-------------------|-----------------------------------------------------------------------------------|----------------------------------------|------------------------------------------|
|                   | Ex'-QH-G <sup>+</sup> R'                                                          | Ex'-QH <sub>2</sub> -G <sup>+</sup> R' | Ex'-QH <sub>2</sub> -GH <sup>2+</sup> R' |
| E'                | 0                                                                                 | 0.8                                    | 17.5                                     |
| Eq'               | 0                                                                                 | 2.8                                    | 19.9                                     |
| Eqn'              | 0                                                                                 | 5.2                                    | 22.2                                     |

| Estrogen<br>(Ex') | Gibbs free energy ( $G_{\text{rel}}$ ) relative to the initial state, in kcal/mol |                            |                                          |                                                        |
|-------------------|-----------------------------------------------------------------------------------|----------------------------|------------------------------------------|--------------------------------------------------------|
|                   | Ex'-QH <sub>2</sub> -GH <sup>2+</sup> R'<br>(TS)                                  | Ex'-QH-G + R <sup>++</sup> | Ex'-QH <sub>2</sub> -G + R <sup>++</sup> | Ex'-QH <sub>2</sub> -GH <sup>+</sup> + R <sup>++</sup> |
| E'                | 27.4                                                                              | 19.6                       | 16.3                                     | 19.7                                                   |
| Eq'               | 30.7                                                                              | 20.3                       | 19.1                                     | 22.3                                                   |
| Eqn'              | 32.4                                                                              | 18.4                       | 19.7                                     | 24.2                                                   |

**Table S15. Molecular Gibbs free energy (G) of initial intermediate species, transition states and products presented in Figures 10b, 10d and 10f.**

| Estrogen<br>(Ex') | G(Ex'-QH-A <sup>+</sup> R')<br>[E <sub>h</sub> ] | G(Ex'-QH <sub>2</sub> -A <sup>+</sup> R')<br>[E <sub>h</sub> ] | G(Ex'-QH <sub>2</sub> -AH <sup>2+</sup> R')<br>[E <sub>h</sub> ] |
|-------------------|--------------------------------------------------|----------------------------------------------------------------|------------------------------------------------------------------|
| E'                | -1314.831239                                     | -1315.283045                                                   | -1315.688204                                                     |
| Eq'               | -1313.631532                                     | -1314.080391                                                   | -1314.487692                                                     |
| Eqn'              | -1312.456155                                     | -1312.900464                                                   | -1313.308422                                                     |

| Estrogen<br>(Ex') | G(Ex'-QH <sub>2</sub> -AH <sup>2+</sup> R'<br>(TS))<br>[E <sub>h</sub> ] | G(Ex'-QH-A + R <sup>++</sup> )<br>[E <sub>h</sub> ] | G(Ex'-QH <sub>2</sub> -A + R <sup>++</sup> )<br>[E <sub>h</sub> ] | G(Ex'-QH <sub>2</sub> -AH <sup>+</sup> + R <sup>++</sup> )<br>[E <sub>h</sub> ] |
|-------------------|--------------------------------------------------------------------------|-----------------------------------------------------|-------------------------------------------------------------------|---------------------------------------------------------------------------------|
| E'                | -1315.683848                                                             | -1083.139354                                        | -1083.596083                                                      | -1084.035658                                                                    |
| Eq'               | -1314.483041                                                             | -1081.938002                                        | -1082.392355                                                      | -1082.831131                                                                    |
| Eqn'              | -1313.302585                                                             | -1080.763323                                        | -1081.214634                                                      | -1081.652998                                                                    |

**Table S16. Calculation of relative Gibbs free energies ( $G_{\text{rel}}$ ) visualized in Figure 10d and 10f. The following formulas were used (see the “Computational Methods” section of the article for mathematical details):**

$$G_{\text{rel}}(\text{Ex}'\text{-QH}_2\text{-A}^+\text{R}') = -RT\ln(x_{\text{prot}})$$

$$G_{\text{rel}}(\text{Ex}'\text{-QH}_2\text{-AH}^{2+}\text{R}') = -RT\ln(x_{\text{prot}})$$

$$G_{\text{rel}}(\text{Ex}'\text{-QH}_2\text{-AH}^{2+}\text{R}' \text{ (TS)}) = G(\text{Ex}'\text{-QH}_2\text{-AH}^{2+}\text{R}' \text{ (TS)}) - G(\text{Ex}'\text{-QH}_2\text{-AH}^{2+}\text{R}') + G_{\text{rel}}(\text{Ex}'\text{-QH}_2\text{-AH}^{2+}\text{R}')$$

$$G_{\text{rel}}(\text{Ex}'\text{-QH-A} + \text{R}') = G(\text{Ex}'\text{-QH-A} + \text{R}') - G(\text{Ex}'\text{-QH-A}^+\text{R}')$$

$$G_{\text{rel}}(\text{Ex}'\text{-QH}_2\text{-A} + \text{R}^{++}) = G(\text{Ex}'\text{-QH}_2\text{-A} + \text{R}^{++}) - G(\text{Ex}'\text{-QH}_2\text{-A}^+\text{R}') + G_{\text{rel}}(\text{Ex}'\text{-QH}_2\text{-A}^+\text{R}')$$

$$G_{\text{rel}}(\text{Ex}'\text{-QH}_2\text{-AH}^+ + \text{R}^{++}) = G(\text{Ex}'\text{-QH}_2\text{-AH}^+ + \text{R}^{++}) - G(\text{Ex}'\text{-QH}_2\text{-AH}^{2+}\text{R}') + G_{\text{rel}}(\text{Ex}'\text{-QH}_2\text{-AH}^{2+}\text{R}')$$

Values of activation Gibbs free energies and effective activation Gibbs free energies relate to  $G_{\text{rel}}$  values as:

$$\Delta G^\ddagger(\text{Ex}'\text{-QH-A} + \text{R}') = G_{\text{rel}}(\text{Ex}'\text{-QH-A} + \text{R}') - G_{\text{rel}}(\text{Ex}'\text{-QH-A}^+\text{R}')$$

$$\Delta G^\ddagger(\text{Ex}'\text{-QH}_2\text{-A}^+\text{R}') = G_{\text{rel}}(\text{Ex}'\text{-QH}_2\text{-A} + \text{R}^{++}) - G_{\text{rel}}(\text{Ex}'\text{-QH}_2\text{-A}^+\text{R}')$$

$$\Delta G_{\text{eff}}^\ddagger(\text{Ex}'\text{-Q(H)H-A}^+\text{R}') = G_{\text{rel}}(\text{Ex}'\text{-QH}_2\text{-AH}^{2+}\text{R}' \text{ (TS)}) - G_{\text{rel}}(\text{Ex}'\text{-QH}_2\text{-AH}^+ + \text{R}^{++})$$

| Estrogen<br>(Ex') | Gibbs free energy ( $G_{\text{rel}}$ ) relative to the initial state, in kcal/mol |                                        |                                          |                                                  |
|-------------------|-----------------------------------------------------------------------------------|----------------------------------------|------------------------------------------|--------------------------------------------------|
|                   | Ex'-QH-A <sup>+</sup> R'                                                          | Ex'-QH <sub>2</sub> -A <sup>+</sup> R' | Ex'-QH <sub>2</sub> -AH <sup>2+</sup> R' | Ex'-QH <sub>2</sub> -AH <sup>2+</sup> R'<br>(TS) |
| E'                | 0                                                                                 | 2.2                                    | 15.7                                     | 18.5                                             |
| Eq'               | 0                                                                                 | 4.0                                    | 16.2                                     | 19.1                                             |
| Eqn'              | 0                                                                                 | 6.8                                    | 18.6                                     | 22.3                                             |

| Estrogen<br>(Ex') | Gibbs free energy ( $G_{\text{rel}}$ ) relative to the initial state, in kcal/mol |                                          |                                                        |
|-------------------|-----------------------------------------------------------------------------------|------------------------------------------|--------------------------------------------------------|
|                   | Ex'-QH-A + R <sup>++</sup>                                                        | Ex'-QH <sub>2</sub> -A + R <sup>++</sup> | Ex'-QH <sub>2</sub> -AH <sup>+</sup> + R <sup>++</sup> |
| E'                | 21.4                                                                              | 20.5                                     | 12.4                                                   |
| Eq'               | 22.5                                                                              | 23.0                                     | 15.5                                                   |
| Eqn'              | 22.0                                                                              | 24.5                                     | 17.2                                                   |

## 5. Investigation of the effect of temperature (25 °C vs 37 °C)

Table S17. Temperature dependence of selected activation Gibbs free energies and reaction Gibbs free energies. Calculations for 37°C were performed following the protocol presented in the previous sections, with the exception that “temperature=310.15” was added to the command line of input files.

| Reaction                                                                           | $\Delta G^\ddagger$ [kcal/mol] |                                      | $\Delta G$ [kcal/mol] |                                      |
|------------------------------------------------------------------------------------|--------------------------------|--------------------------------------|-----------------------|--------------------------------------|
|                                                                                    | @ 25°C                         | @ 37 °C<br>(deviation<br>from 25 °C) | @ 25 °C               | @ 37 °C<br>(deviation<br>from 25 °C) |
| $E'-Q(H)H^+ + GR' \rightarrow E'-Q(H)H^+-GR'$<br>(Michael addition)                | 0.5                            | 1.0<br>(+ 0.5)                       | -21.9                 | -21.3<br>(+ 0.6)                     |
| $E'-Q(H)H^+-GR' + AcO^- \rightarrow E'-QH^--G^+R' + AcOH$<br>(rearomatization)     | 11.2                           | 11.6<br>(+ 0.4)                      | -11.6                 | -11.6<br>(0.0)                       |
| $E'-QH_2-G^+R' \rightarrow E'-QH_2-G + R'^+$<br>(depurination)                     | -                              | -                                    | 15.5                  | 15.0<br>(-0.5)                       |
| Average absolute deviation: 0.4 kcal/mol                                           |                                |                                      |                       |                                      |
| $Eq'-Q(H)H^+ + GR' \rightarrow Eq'-Q(H)H^+-GR'$<br>(Michael addition)              | 0.0                            | 0.1<br>(+ 0.1)                       | -23.0                 | -22.5<br>(+ 0.5)                     |
| $Eq'-Q(H)H^+-GR' + AcO^- \rightarrow Eq'-QH^--G^+R' + AcOH$<br>(rearomatization)   | 10.4                           | 10.9<br>(+ 0.5)                      | -15.2                 | -15.3<br>(0.0)                       |
| $Eq'-QH_2-G^+R' \rightarrow Eq'-QH_2-G + R'^+$<br>(depurination)                   | -                              | -                                    | 16.2                  | 15.9<br>(- 0.4)                      |
| Average absolute deviation: 0.3 kcal/mol                                           |                                |                                      |                       |                                      |
| $Eqn'-Q(H)H^+ + GR' \rightarrow Eqn'-Q(H)H^+-GR'$<br>(Michael addition)            | 3.5                            | 4.0<br>(+ 0.5)                       | -14.2                 | -13.7<br>(+ 0.5)                     |
| $Eqn'-Q(H)H^+-GR' + AcO^- \rightarrow Eqn'-QH^--G^+R' + AcOH$<br>(rearomatization) | 12.3                           | 12.8<br>(+ 0.4)                      | -4.0                  | -4.1<br>(0.1)                        |
| $Eqn'-QH_2-G^+R' \rightarrow Eqn'-QH_2-G + R'^+$<br>(depurination)                 | -                              | -                                    | 14.6                  | 14.1<br>(- 0.5)                      |
| Average absolute deviation: 0.4 kcal/mol                                           |                                |                                      |                       |                                      |

## 6. Optimized geometries

|                                                                                                                                                                                                                                                                                                                                                                                                                                                                                                                                                                   |                                                                                                                                                                                                                                                                                                                                                                                                                                                                                                                                                                                                                        |
|-------------------------------------------------------------------------------------------------------------------------------------------------------------------------------------------------------------------------------------------------------------------------------------------------------------------------------------------------------------------------------------------------------------------------------------------------------------------------------------------------------------------------------------------------------------------|------------------------------------------------------------------------------------------------------------------------------------------------------------------------------------------------------------------------------------------------------------------------------------------------------------------------------------------------------------------------------------------------------------------------------------------------------------------------------------------------------------------------------------------------------------------------------------------------------------------------|
| <b>AcOH (Ref<sub>a</sub>)</b><br>C -1.350400 0.042276 -0.000004<br>H -1.732933 -0.482859 0.879888<br>H -1.732873 -0.483237 -0.879692<br>H -1.731269 1.064344 -0.000233<br>C 0.187607 0.000617 0.000026<br>O 0.717409 -1.145395 -0.000006<br>O 0.804320 1.100944 -0.000005                                                                                                                                                                                                                                                                                         | <b>AcOH (Ref<sub>a</sub>H<sup>+</sup>)</b><br>C 1.391994 -0.122952 -0.000101<br>H 1.667010 -0.707035 -0.881059<br>H 1.667845 -0.706726 0.880799<br>H 1.925779 0.824196 -0.000524<br>C -0.087852 0.122867 0.000586<br>O -0.790172 -1.031305 -0.000070<br>H -1.735532 -0.812503 -0.000391<br>O -0.628572 1.206627 -0.000147                                                                                                                                                                                                                                                                                              |
| <b>ortho-Quinone (Ref<sub>a</sub>)</b><br>C 0.635363 -1.455428 0.000329<br>C -0.665095 -0.783749 0.000007<br>C -0.664961 0.783782 0.000166<br>C 0.635599 1.455350 -0.000327<br>C 1.770967 0.731137 -0.000217<br>C 1.770823 -0.731332 0.000194<br>O -1.727572 -1.376395 -0.000525<br>O -1.727319 1.376633 0.000434<br>H 0.638749 -2.538558 0.000518<br>H 2.732513 -1.230737 0.000325<br>H 0.638939 2.538480 -0.000602<br>H 2.732753 1.230352 -0.000427                                                                                                             | <b>ortho-Quinone-H<sup>+</sup> (Ref<sub>a</sub>H<sup>+</sup>)</b><br>C 0.838197 1.411327 0.000027<br>C -0.511470 0.848696 -0.000214<br>C -0.638714 -0.689814 -0.000180<br>C 0.493573 -1.507908 0.000002<br>C 1.710853 -0.878844 0.000071<br>C 1.887647 0.570248 0.000017<br>O -1.550014 1.470900 0.000077<br>O -1.830345 -1.155612 0.000091<br>H 0.935972 2.488288 0.000151<br>H -2.477921 -0.412772 0.000126<br>H 2.900283 0.950419 0.000064<br>H 0.395847 -2.584505 0.000032<br>H 2.608168 -1.485966 -0.000056                                                                                                       |
| <b>cyclohexan-1,2-dione (Ref<sub>a</sub>)</b><br>C 1.742546 0.969623 -0.000211<br>C 1.942335 -0.565026 0.000551<br>C 0.661747 -1.427793 -0.000224<br>C -0.704145 -0.755721 0.000069<br>C -0.845330 0.739191 0.000004<br>C 0.325095 1.461155 -0.000402<br>H 2.264223 1.398280 0.866587<br>H 2.543938 -0.840347 -0.868114<br>H 0.650850 -2.094180 -0.869139<br>O -2.040392 1.239999 0.000429<br>O -1.692863 -1.490152 -0.000220<br>H 0.650633 -2.095251 0.867849<br>H 2.542442 -0.839700 0.870455<br>H 2.264273 1.397600 -0.867312<br>H 0.216189 2.546248 -0.000718 | <b>cyclohexan-1,2-dione (Ref<sub>a</sub>H<sup>+</sup>)</b><br>C -1.761874 -0.987811 -0.000160<br>C -1.978043 0.547438 0.000463<br>C -0.718342 1.448502 -0.000355<br>C 0.632249 0.784194 -0.000047<br>C 0.730319 -0.678933 0.000121<br>C -0.350146 -1.471857 -0.000176<br>H -2.263491 -1.433213 0.866512<br>H -2.582894 0.807996 -0.868538<br>H -0.718646 2.112043 -0.870238<br>O 2.003233 -1.175619 0.000146<br>O 1.673495 1.440968 0.000069<br>H -0.718514 2.113271 0.868582<br>H -2.581467 0.807489 0.870609<br>H -2.263440 -1.432640 -0.867156<br>H 2.589265 -0.398985 -0.000156<br>H -0.199607 -2.547949 -0.000420 |
| <b>Cathecol (Ref<sub>a</sub>)</b><br>C 0.624312 -1.406808 -0.000007<br>C -0.545590 -0.674437 0.000001<br>C 1.862360 -0.735152 -0.000002<br>C -0.570327 0.760841 0.000007<br>O -1.788100 -1.263130 0.000006<br>C 1.881750 0.657485 0.000003<br>C 0.690467 1.397855 0.000003<br>O -1.736954 1.338689 -0.000011<br>H 0.579969 -2.491512 -0.000020<br>H -2.377041 -0.475562 0.000024<br>H 2.785893 -1.302488 0.000001<br>H 2.832013 1.182712 0.000006<br>H 0.721771 2.483681 0.000000                                                                                 | <b>Cathecol (Ref<sub>a</sub>H<sup>+</sup>)</b><br>C -0.720983 -1.389273 -0.000037<br>C 0.500376 -0.726584 -0.000012<br>C -1.911027 -0.659549 -0.000009<br>C 0.532368 0.675456 0.000035<br>O 1.664633 -1.445000 0.000067<br>C -1.877754 0.732990 -0.000004<br>C -0.651894 1.402453 0.000057<br>O 1.788552 1.230532 -0.000081<br>H -0.727142 -2.472725 -0.000073<br>H 2.407380 -0.825488 -0.000073<br>H 1.739842 2.193430 0.000064<br>H -2.859127 -1.183244 -0.000040<br>H -2.797815 1.304248 -0.000015<br>H -0.615123 2.486553 0.000064                                                                                 |
| <b>8-Oxo-guanine (Ref<sub>a</sub>)</b><br>N 1.927451 0.673876 -0.001726<br>C 1.987780 -0.693226 -0.001258<br>N 0.908033 -1.456199 0.002503<br>C -0.245182 -0.766474 -0.001824<br>C -0.394342 0.608576 -0.000902<br>C 0.739130 1.449399 0.000315<br>N -1.510205 -1.306204 -0.000142<br>C -2.481521 -0.297536 0.001288                                                                                                                                                                                                                                              | <b>8-Oxo-guanine-H<sup>+</sup> (Ref<sub>a</sub>H<sup>+</sup>)</b><br>N 1.923299 0.715947 -0.002905<br>C 2.052489 -0.623698 -0.000575<br>N 0.924820 -1.371994 -0.002710<br>C -0.292597 -0.744567 -0.002224<br>C -0.427301 0.617243 0.000062<br>C 0.703666 1.475398 -0.000622<br>N -1.527115 -1.307439 -0.002079<br>C -2.513130 -0.292569 0.000700                                                                                                                                                                                                                                                                       |

|                                                                                                                                                                                                                                                                                                                                                                                                                                                                                                                                                                                                                                                                                                                                                                                                                                                                                                                                                                                                                                                                                                                                                                                               |                                                                                                                                                                                                                                                                                                                                                                                                                                                                                                                                                                                                                                                                                                                                                                                                                                                                                                                                                                                                                                                                                                                                                                                                                                              |
|-----------------------------------------------------------------------------------------------------------------------------------------------------------------------------------------------------------------------------------------------------------------------------------------------------------------------------------------------------------------------------------------------------------------------------------------------------------------------------------------------------------------------------------------------------------------------------------------------------------------------------------------------------------------------------------------------------------------------------------------------------------------------------------------------------------------------------------------------------------------------------------------------------------------------------------------------------------------------------------------------------------------------------------------------------------------------------------------------------------------------------------------------------------------------------------------------|----------------------------------------------------------------------------------------------------------------------------------------------------------------------------------------------------------------------------------------------------------------------------------------------------------------------------------------------------------------------------------------------------------------------------------------------------------------------------------------------------------------------------------------------------------------------------------------------------------------------------------------------------------------------------------------------------------------------------------------------------------------------------------------------------------------------------------------------------------------------------------------------------------------------------------------------------------------------------------------------------------------------------------------------------------------------------------------------------------------------------------------------------------------------------------------------------------------------------------------------|
| N -1.765213 0.877979 0.002849<br>O 0.798686 2.681602 0.001806<br>N 3.213599 -1.270259 -0.050370<br>H 2.785429 1.212044 -0.023172<br>H 3.244644 -2.262735 0.126696<br>H 4.031056 -0.744296 0.217498<br>O -3.696148 -0.449412 0.001383<br>H -2.196891 1.788574 -0.002502<br>H -1.735397 -2.289886 -0.001552                                                                                                                                                                                                                                                                                                                                                                                                                                                                                                                                                                                                                                                                                                                                                                                                                                                                                     | N -1.793219 0.881965 0.001769<br>O 0.750509 2.691340 0.000175<br>N 3.242113 -1.203140 0.001721<br>H 2.765476 1.281562 -0.007390<br>H 3.339902 -2.207733 0.006069<br>H 4.090373 -0.657073 0.024366<br>H 0.986136 -2.382725 0.002632<br>O -3.717028 -0.458345 0.002222<br>H -2.221450 1.795176 0.004461<br>H -1.756326 -2.291385 -0.003937                                                                                                                                                                                                                                                                                                                                                                                                                                                                                                                                                                                                                                                                                                                                                                                                                                                                                                     |
| <b>Adenosine (Ref<sub>a</sub>)</b><br>N 4.352612 0.953664 -0.037585<br>C 3.414956 1.953345 0.012039<br>N 2.129989 1.753429 -0.014856<br>C 1.792787 0.449799 -0.100412<br>C 2.665590 -0.639017 -0.162235<br>C 4.044546 -0.376864 -0.127313<br>N 0.538263 -0.092118 -0.145535<br>C 0.707767 -1.462500 -0.233095<br>N 1.969517 -1.823272 -0.249881<br>C -2.835349 -0.204976 -0.611626<br>C -0.716010 0.646673 -0.098167<br>C -1.487863 0.469092 1.225915<br>C -2.933768 0.535203 0.727245<br>O -1.563487 0.196496 -1.148275<br>H -0.137410 -2.127283 -0.286449<br>H -2.838695 -1.285640 -0.429609<br>H -0.455489 1.693543 -0.257119<br>H -1.238287 1.264770 1.931583<br>H -3.216109 1.580429 0.555166<br>N 4.994090 -1.298929 -0.174277<br>H 4.731808 -2.271834 -0.233544<br>H 5.976774 -1.072529 -0.135357<br>H 3.815818 2.955485 0.077599<br>H 5.327643 1.231390 -0.003803<br>O -1.208264 -0.803936 1.782803<br>H -2.023678 -1.107156 2.208524<br>O -3.798043 -0.078650 1.664698<br>H -4.635368 -0.243987 1.206749<br>C -3.942663 0.154834 -1.581780<br>H -3.834951 -0.397292 -2.519951<br>H -3.915076 1.228845 -1.792402<br>O -5.154985 -0.207620 -0.905598<br>H -5.909998 0.097986 -1.418907 | <b>Adenosine (Ref<sub>a</sub>H<sup>+</sup>)</b><br>N 4.310146 0.984815 -0.091587<br>C 3.359571 1.959595 -0.212574<br>N 2.081417 1.726371 -0.275055<br>C 1.775014 0.422147 -0.219856<br>C 2.664413 -0.638965 -0.109223<br>C 4.045892 -0.356835 -0.026304<br>N 0.507280 -0.121477 -0.269283<br>C 0.615432 -1.455829 -0.185973<br>N 1.898726 -1.792597 -0.096634<br>C -2.884912 -0.297134 -0.537217<br>C -0.757127 0.638765 -0.305191<br>C -1.435039 0.674029 1.081636<br>C -2.910631 0.645519 0.672432<br>O -1.638332 0.004866 -1.201196<br>H -0.207455 -2.148250 -0.206385<br>H -2.875379 -1.335941 -0.191938<br>H -0.491216 1.633828 -0.659952<br>H -1.151860 1.569831 1.637137<br>H -3.224642 1.647897 0.359685<br>N 5.027891 -1.223534 0.106076<br>H 4.857988 -2.216346 0.166002<br>H 5.993586 -0.928225 0.154942<br>H 3.738138 2.971823 -0.251935<br>H 5.278081 1.290617 -0.045010<br>O -1.089862 -0.499153 1.796229<br>H -1.868793 -0.759325 2.310612<br>O -3.694069 0.174561 1.749873<br>H -4.563196 -0.052718 1.387760<br>C -4.041521 -0.081288 -1.492014<br>H -3.989396 -0.777860 -2.333577<br>H -4.020049 0.944940 -1.872345<br>O -5.211060 -0.315056 -0.696798<br>H -5.995068 -0.084558 -1.205891<br>H 2.221064 -2.752535 -0.042885 |
| <b>Oxocarbenium (R<sup>+</sup>)</b><br>C 1.155778 -0.471567 -0.098505<br>C -1.119039 -0.428817 0.042565<br>C -0.767809 0.987285 -0.089050<br>C 0.761398 0.986600 0.120870<br>O -0.151724 -1.224709 0.055539<br>H 1.817151 -0.906874 0.643117<br>H 1.481286 -0.717193 -1.106575<br>H -2.113846 -0.861465 0.106772<br>H -1.343999 1.603853 0.604271<br>H -1.080023 1.294519 -1.098838<br>H 1.270111 1.640824 -0.583031<br>H 1.001143 1.303003 1.134686                                                                                                                                                                                                                                                                                                                                                                                                                                                                                                                                                                                                                                                                                                                                          |                                                                                                                                                                                                                                                                                                                                                                                                                                                                                                                                                                                                                                                                                                                                                                                                                                                                                                                                                                                                                                                                                                                                                                                                                                              |
| <b>GR'</b><br>N 2.613248 1.053532 -0.005938<br>C 1.399889 1.696439 -0.034425<br>N 0.249843 1.056312 -0.047087<br>C 0.381728 -0.287963 -0.038547<br>C 1.559548 -1.034804 -0.001077<br>C 2.811556 -0.348068 0.016600<br>N -0.636610 -1.214176 -0.047720<br>C -0.028664 -2.456981 -0.002433<br>N 1.278819 -2.390871 0.019602<br>C 3.953515 -0.802830 0.045827                                                                                                                                                                                                                                                                                                                                                                                                                                                                                                                                                                                                                                                                                                                                                                                                                                    | <b>AR'</b><br>N -3.346278 1.023315 0.062430<br>C -2.365214 1.936384 0.012713<br>N -1.048053 1.734081 -0.059691<br>C -0.743699 0.429962 -0.077965<br>C -1.653420 -0.628670 -0.028786<br>C -3.017488 -0.283614 0.040710<br>N 0.502140 -0.159839 -0.152266<br>C 0.281174 -1.523750 -0.124967<br>N -0.989794 -1.844632 -0.055710<br>C 3.681109 -0.290137 0.959365                                                                                                                                                                                                                                                                                                                                                                                                                                                                                                                                                                                                                                                                                                                                                                                                                                                                                |

|                                                                                                                                                                                                                                                                                                                                                                                                                                                                                                                                                                                           |                                                                                                                                                                                                                                                                                                                                                                                                                                                                                                                                                  |
|-------------------------------------------------------------------------------------------------------------------------------------------------------------------------------------------------------------------------------------------------------------------------------------------------------------------------------------------------------------------------------------------------------------------------------------------------------------------------------------------------------------------------------------------------------------------------------------------|--------------------------------------------------------------------------------------------------------------------------------------------------------------------------------------------------------------------------------------------------------------------------------------------------------------------------------------------------------------------------------------------------------------------------------------------------------------------------------------------------------------------------------------------------|
| N 1.418050 3.053870 -0.097812<br>C -3.000325 0.969070 0.872920<br>C -2.081866 -0.976914 -0.050292<br>C -2.556243 -0.081621 -1.212113<br>C -3.561666 0.864428 -0.540952<br>O -2.488379 -0.353391 1.159352<br>H 3.464729 1.601655 -0.015813<br>H -0.616491 -3.362343 0.006090<br>H 0.533460 3.511029 0.064982<br>H 2.235643 3.558053 0.210711<br>H -2.180833 1.690987 0.925363<br>H -2.531530 -1.970024 -0.085443<br>H -2.991136 -0.680122 -2.011724<br>H -4.560143 0.421059 -0.519928<br>H -3.622770 1.832953 -1.038796<br>H -1.713667 0.477349 -1.616691<br>H -3.745543 1.196976 1.634395 | C 1.779207 0.548867 -0.129421<br>C 2.773925 0.067656 -1.200590<br>C 4.114777 0.070785 -0.456901<br>O 2.414605 0.382487 1.137194<br>H 1.095721 -2.230496 -0.154377<br>H 3.544818 -1.371509 1.076256<br>H 1.519759 1.600777 -0.243419<br>H 2.755123 0.718540 -2.073690<br>H 4.564603 1.066281 -0.471142<br>N -4.001918 -1.206836 0.064636<br>H -3.775197 -2.181525 0.178305<br>H -4.948937 -0.908939 0.238034<br>H -2.689378 2.972134 0.035154<br>H 2.519901 -0.941103 -1.530423<br>H 4.829670 -0.640235 -0.872022<br>H 4.352175 0.068641 1.739029 |
|-------------------------------------------------------------------------------------------------------------------------------------------------------------------------------------------------------------------------------------------------------------------------------------------------------------------------------------------------------------------------------------------------------------------------------------------------------------------------------------------------------------------------------------------------------------------------------------------|--------------------------------------------------------------------------------------------------------------------------------------------------------------------------------------------------------------------------------------------------------------------------------------------------------------------------------------------------------------------------------------------------------------------------------------------------------------------------------------------------------------------------------------------------|

|                                                                                                                                                                                                                                                                                                                                                                                                                                                                                                                                                                                                                                                                                                                                                                                                                                                                                                                                                                                             |                                                                                                                                                                                                                                                                                                                                                                                                                                                                                                                                                                                                                                                                                                                                                                                                                                                                                                                                 |                                                                                                                                                                                                                                                                                                                                                                                                                                                                                                                                                                                                                                                                                                                                                                                                                                                 |
|---------------------------------------------------------------------------------------------------------------------------------------------------------------------------------------------------------------------------------------------------------------------------------------------------------------------------------------------------------------------------------------------------------------------------------------------------------------------------------------------------------------------------------------------------------------------------------------------------------------------------------------------------------------------------------------------------------------------------------------------------------------------------------------------------------------------------------------------------------------------------------------------------------------------------------------------------------------------------------------------|---------------------------------------------------------------------------------------------------------------------------------------------------------------------------------------------------------------------------------------------------------------------------------------------------------------------------------------------------------------------------------------------------------------------------------------------------------------------------------------------------------------------------------------------------------------------------------------------------------------------------------------------------------------------------------------------------------------------------------------------------------------------------------------------------------------------------------------------------------------------------------------------------------------------------------|-------------------------------------------------------------------------------------------------------------------------------------------------------------------------------------------------------------------------------------------------------------------------------------------------------------------------------------------------------------------------------------------------------------------------------------------------------------------------------------------------------------------------------------------------------------------------------------------------------------------------------------------------------------------------------------------------------------------------------------------------------------------------------------------------------------------------------------------------|
| <b>E'-Q(H)</b><br>C 2.112271 1.601495 0.372306<br>C 2.681012 0.281430 0.133477<br>C 1.676804 -0.888524 -0.130202<br>C 0.239710 -0.589507 -0.169396<br>C -0.178399 0.681015 0.063238<br>C 0.777534 1.763842 0.331326<br>O 3.876885 0.049070 0.129145<br>O 2.126014 -2.010647 -0.290201<br>C -0.698738 -1.736140 -0.427605<br>C -2.126829 -1.274049 -0.725025<br>C -2.568554 -0.145006 0.217596<br>C -1.637871 1.072143 0.050021<br>C -1.950970 1.885875 -1.222715<br>C -2.624137 -0.604795 1.679770<br>H 2.791506 2.419948 0.577126<br>H -0.680497 -2.399306 0.445687<br>H -0.309355 -2.337210 -1.253471<br>H -2.812627 -2.121105 -0.641009<br>H -2.185041 -0.925742 -1.760235<br>H -3.575451 0.169686 -0.074733<br>H -1.793820 1.741947 0.905014<br>H -2.980357 2.249557 -1.185497<br>H -1.830812 1.272530 -2.118276<br>H -1.290650 2.750709 -1.320541<br>H -3.027757 0.185906 2.317810<br>H -1.632410 -0.862833 2.061337<br>H -3.263527 -1.485463 1.786038<br>H 0.356599 2.747314 0.512463 | <b>Eq'-Q(H)</b><br>C 2.099433 -1.658925 -0.353374<br>C 2.738224 -0.364118 -0.144910<br>C 1.799155 0.864317 0.092154<br>C 0.348875 0.648236 0.071252<br>C -0.134965 -0.602320 -0.118238<br>C 0.757458 -1.748108 -0.334628<br>O 3.944296 -0.196191 -0.151731<br>O 2.306034 1.955066 0.289682<br>C -0.543511 1.840558 0.260476<br>C -1.971652 1.557716 -0.103273<br>C -2.468388 0.332506 -0.281792<br>C -1.612244 -0.899205 -0.073894<br>C -1.951839 -1.598081 1.267668<br>C -3.897602 0.086857 -0.678585<br>H 2.736303 -2.518279 -0.523489<br>H -0.157914 2.672772 -0.338049<br>H -0.471743 2.190698 1.300076<br>H -2.617570 2.421302 -0.232590<br>H -1.832031 -1.616248 -0.875423<br>H -3.004882 -1.882192 1.294943<br>H -1.749633 -0.922484 2.101710<br>H -1.356323 -2.503725 1.403674<br>H -3.946088 -0.463108 -1.625028<br>H -4.442086 1.025086 -0.797454<br>H -4.423250 -0.519982 0.065372<br>H 0.284908 -2.711449 -0.494476 | <b>Eqn'-Q(H)</b><br>C -1.996769 1.689498 0.000862<br>C -2.703853 0.420599 -0.001382<br>C -1.839387 -0.874781 0.001413<br>C -0.372398 -0.723388 0.000384<br>C 0.216708 0.562826 0.000805<br>C -0.647836 1.738898 0.001763<br>O -3.920535 0.321151 -0.005127<br>O -2.404803 -1.953105 0.004497<br>C 0.433730 -1.857723 -0.000656<br>C 1.815334 -1.721640 -0.001329<br>C 2.423011 -0.462900 -0.000785<br>C 1.618302 0.700541 0.000327<br>C 2.251630 2.071931 0.000855<br>C 3.927348 -0.382179 -0.001329<br>H -2.595208 2.592601 0.001125<br>H -0.028351 -2.836526 -0.000980<br>H 2.439373 -2.607468 -0.002317<br>H 3.336440 2.015256 0.003026<br>H 1.952160 2.646088 0.881471<br>H 1.955548 2.645060 -0.881616<br>H 4.298302 0.151330 -0.880809<br>H 4.363916 -1.380884 -0.002838<br>H 4.298891 0.148826 0.879449<br>H -0.173274 2.711257 0.002955 |
| <b>E'-Q(H)H<sup>+</sup></b><br>C 2.080048 1.624709 0.369944<br>C 2.583409 0.349545 0.150633<br>C 1.637575 -0.830898 -0.149646<br>C 0.191401 -0.582594 -0.178745<br>C -0.240208 0.685418 0.051269<br>C 0.713781 1.757991 0.308374<br>O 3.835635 0.070022 0.176293<br>O 2.178369 -1.899817 -0.342087<br>C -0.717095 -1.744536 -0.424772<br>C -2.157374 -1.307824 -0.703263<br>C -2.604972 -0.175687 0.234628<br>C -1.701764 1.059294 0.043777<br>C -2.030977 1.852061 -1.237785<br>C -2.633894 -0.620548 1.702475<br>H 2.736084 2.458095 0.578376<br>H 3.956302 -0.890685 -0.006375<br>H -0.667979 -2.399494 0.454313<br>H -0.320637 -2.342159 -1.250181<br>H -2.823068 -2.166745 -0.596004<br>H -2.236835 -0.975724 -1.741698<br>H -3.619417 0.117911 -0.049950<br>H -1.861153 1.734493 0.893246                                                                                                                                                                                             | <b>Eq'-Q(H)H<sup>+</sup></b><br>C 2.077573 -1.666604 -0.366373<br>C 2.641174 -0.415354 -0.143423<br>C 1.750573 0.823581 0.083255<br>C 0.296181 0.644677 0.080042<br>C -0.193150 -0.603139 -0.120910<br>C 0.706272 -1.729040 -0.350844<br>O 3.905791 -0.206530 -0.119826<br>O 2.339107 1.871054 0.249402<br>C -0.574480 1.840705 0.281854<br>C -2.004238 1.569083 -0.088678<br>C -2.510115 0.349525 -0.277378<br>C -1.669277 -0.895721 -0.075177<br>C -2.007744 -1.596290 1.265268<br>C -3.938715 0.118673 -0.681932<br>H 2.696133 -2.535529 -0.541882<br>H 4.074017 0.749490 0.050591<br>H -0.175248 2.676916 -0.301842<br>H -0.495228 2.167447 1.328911<br>H -2.638476 2.440600 -0.213390<br>H -1.894094 -1.604869 -0.881026<br>H -3.061723 -1.875159 1.289219<br>H -1.801167 -0.925157 2.101323                                                                                                                               | <b>Eqn'-Q(H)H<sup>+</sup></b><br>C -1.970938 1.703780 0.000047<br>C -2.599149 0.473156 -0.000030<br>C -1.800948 -0.820754 0.000007<br>C -0.344673 -0.707912 -0.000024<br>C 0.261598 0.581357 0.000017<br>C -0.585811 1.734354 0.000096<br>O -3.885963 0.335430 -0.000097<br>O -2.451306 -1.852655 0.000107<br>C 0.433677 -1.848408 -0.000055<br>C 1.829523 -1.732285 -0.000041<br>C 2.456690 -0.495390 0.000015<br>C 1.670332 0.696616 0.000002<br>C 2.394293 2.008146 -0.000083<br>C 3.955334 -0.418988 0.000054<br>H -2.550721 2.616476 0.000086<br>H -4.090541 -0.627053 -0.000077<br>H -0.038154 -2.822362 -0.000092<br>H 2.433147 -2.631297 -0.000060<br>H 3.044114 2.074259 0.876998<br>H 1.745683 2.877751 -0.000206<br>H 3.044166 2.074109 -0.877135<br>H 4.321914 0.118879 -0.878729                                                   |

|                                                                                                                                                                                                                                                                                                                                                                                                                                                                                                                                                                                                                                                                                                                                                                                                                                                                                                                                                                                                                                                                                                                                                                                                                                                                                                                                                                                                                                                                                                                                                                                                                                                                                                                                                                                                                                                                                                                                                 |                                                                                                                                                                                                                                                                                                                                                                                                                                                                                                                                                                                                                                                                                                                                                                                                                                                                                                                                                                                                                                                                                                                                                                                                                                                                                                                                                                                                                                                                                                                                                                                                                                                                                                                                                                                                                                                                         |                                                                                                                                                                                                                                                                                                                                                                                                                                                                                                                                                                                                                                                                                                                                                                                                                                                                                                                                                                                                                                                                                                                                                                                                                                                                                                                                                                                                                                                                                                                                                                                                                                                                                                                                                                                                                |
|-------------------------------------------------------------------------------------------------------------------------------------------------------------------------------------------------------------------------------------------------------------------------------------------------------------------------------------------------------------------------------------------------------------------------------------------------------------------------------------------------------------------------------------------------------------------------------------------------------------------------------------------------------------------------------------------------------------------------------------------------------------------------------------------------------------------------------------------------------------------------------------------------------------------------------------------------------------------------------------------------------------------------------------------------------------------------------------------------------------------------------------------------------------------------------------------------------------------------------------------------------------------------------------------------------------------------------------------------------------------------------------------------------------------------------------------------------------------------------------------------------------------------------------------------------------------------------------------------------------------------------------------------------------------------------------------------------------------------------------------------------------------------------------------------------------------------------------------------------------------------------------------------------------------------------------------------|-------------------------------------------------------------------------------------------------------------------------------------------------------------------------------------------------------------------------------------------------------------------------------------------------------------------------------------------------------------------------------------------------------------------------------------------------------------------------------------------------------------------------------------------------------------------------------------------------------------------------------------------------------------------------------------------------------------------------------------------------------------------------------------------------------------------------------------------------------------------------------------------------------------------------------------------------------------------------------------------------------------------------------------------------------------------------------------------------------------------------------------------------------------------------------------------------------------------------------------------------------------------------------------------------------------------------------------------------------------------------------------------------------------------------------------------------------------------------------------------------------------------------------------------------------------------------------------------------------------------------------------------------------------------------------------------------------------------------------------------------------------------------------------------------------------------------------------------------------------------------|----------------------------------------------------------------------------------------------------------------------------------------------------------------------------------------------------------------------------------------------------------------------------------------------------------------------------------------------------------------------------------------------------------------------------------------------------------------------------------------------------------------------------------------------------------------------------------------------------------------------------------------------------------------------------------------------------------------------------------------------------------------------------------------------------------------------------------------------------------------------------------------------------------------------------------------------------------------------------------------------------------------------------------------------------------------------------------------------------------------------------------------------------------------------------------------------------------------------------------------------------------------------------------------------------------------------------------------------------------------------------------------------------------------------------------------------------------------------------------------------------------------------------------------------------------------------------------------------------------------------------------------------------------------------------------------------------------------------------------------------------------------------------------------------------------------|
| H -3.063718 2.203304 -1.194665<br>H -1.908640 1.227751 -2.125103<br>H -1.382983 2.724447 -1.353167<br>H -3.044163 0.169634 2.336180<br>H -1.634425 -0.857668 2.077838<br>H -3.256270 -1.510807 1.823817<br>H 0.295282 2.744420 0.478386                                                                                                                                                                                                                                                                                                                                                                                                                                                                                                                                                                                                                                                                                                                                                                                                                                                                                                                                                                                                                                                                                                                                                                                                                                                                                                                                                                                                                                                                                                                                                                                                                                                                                                         | H -1.418080 -2.506657 1.397750<br>H -3.985985 -0.420682 -1.634156<br>H -4.475022 1.062100 -0.792539<br>H -4.470055 -0.492133 0.054233<br>H 0.241417 -2.693130 -0.528024                                                                                                                                                                                                                                                                                                                                                                                                                                                                                                                                                                                                                                                                                                                                                                                                                                                                                                                                                                                                                                                                                                                                                                                                                                                                                                                                                                                                                                                                                                                                                                                                                                                                                                 | H 4.392972 -1.416190 0.000263<br>H 4.321852 0.119249 0.878629<br>H -0.125844 2.711950 0.000214                                                                                                                                                                                                                                                                                                                                                                                                                                                                                                                                                                                                                                                                                                                                                                                                                                                                                                                                                                                                                                                                                                                                                                                                                                                                                                                                                                                                                                                                                                                                                                                                                                                                                                                 |
| <b>E'-Q(H)-GR'(TS)</b><br>C -2.414308 -3.061582 0.654159<br>C -2.046653 -1.943423 -0.344405<br>H -2.370793 -4.033594 0.159073<br>H -3.432125 -2.917150 1.027111<br>H -1.729768 -3.098576 1.501191<br>C -2.206106 -0.585081 0.306697<br>C -2.854125 -2.107099 -1.653249<br>H -0.982499 -2.056288 -0.590350<br>C -3.004486 -0.775810 -2.389122<br>C -3.003323 0.386083 -0.183294<br>H -3.863214 -2.439433 -1.375291<br>C -1.386251 -0.321996 1.532546<br>C -2.226775 -3.172422 -2.556105<br>C -3.705208 0.253969 -1.508523<br>H -2.012359 -0.400453 -2.669875<br>C -1.661952 0.800006 2.352224<br>H -3.564446 -0.925264 -3.316806<br>C -3.178846 1.655264 0.561850<br>H -1.054989 -1.214250 2.048971<br>H -1.235787 -2.850814 -2.893291<br>H -2.844575 -3.341927 -3.442102<br>H -2.111339 -4.129967 -2.042833<br>C -2.510441 1.830390 1.945455<br>H -4.753480 -0.030658 -1.352369<br>H -3.729711 1.234586 -1.988714<br>H -1.168741 0.876626 3.314958<br>O -3.860188 2.561025 0.100300<br>O -2.800592 2.859181 2.602348<br>N 0.250558 -0.108365 0.689006<br>C 0.555452 0.953856 -0.023626<br>C 1.342410 -0.954172 0.662188<br>N 1.818417 0.852695 -0.524786<br>H -0.094804 1.790843 -0.210308<br>C 1.586864 -2.223696 1.267720<br>C 2.338218 -0.353726 -0.102403<br>N 3.564745 -0.828665 -0.379039<br>O 0.849824 -2.894151 1.982187<br>N 2.883519 -2.677334 0.937951<br>C 3.805817 -2.008193 0.166197<br>H 3.133370 -3.570857 1.345291<br>N 5.013519 -2.585325 0.002384<br>H 5.167434 -3.554503 0.230971<br>H 5.639292 -2.162188 -0.665164<br>C 2.526967 1.867467 -1.357313<br>C 3.577731 2.616205 -0.538177<br>H 2.929822 1.330234 -2.214783<br>C 1.761101 4.064432 -1.043636<br>C 2.744937 3.746386 0.079549<br>H 4.329231 3.013658 -1.223715<br>H 4.074120 1.974707 0.187669<br>H 2.158808 4.806695 -1.739259<br>H 0.779096 4.385191 -0.696085<br>H 3.346653 4.611296 0.356745<br>H 2.218928 3.396092 0.970605<br>O 1.587260 2.815670 -1.781416 | <b>Eq'-Q(H)-GR'(TS)</b><br>C 3.001979 -2.818124 -0.757778<br>C 2.136185 -1.911627 0.152963<br>H 2.887660 -3.865816 -0.473327<br>H 4.055835 -2.545317 -0.668815<br>H 2.703904 -2.722146 -1.804101<br>C 2.246225 -0.483959 -0.315566<br>C 2.520497 -2.075899 1.608414<br>C 3.286674 -1.171655 2.220987<br>C 3.037151 0.412761 0.299861<br>C 1.443806 -0.095670 -1.514315<br>C 2.005300 -3.310263 2.294308<br>C 3.782574 0.083973 1.563817<br>C 1.698634 1.134822 -2.166252<br>C 3.178330 1.778831 -0.249276<br>H 1.165994 -0.933493 -2.145263<br>H 0.909532 -3.325232 2.286820<br>H 2.343587 -3.360700 3.330814<br>H 2.335065 -4.220597 1.783197<br>C 2.507604 2.125285 -1.602262<br>H 3.699058 0.930915 2.252488<br>H 1.219949 1.331473 -3.119074<br>O 3.831248 2.627948 0.341792<br>O 2.767203 3.244483 -2.103744<br>N -0.222015 -0.039015 -0.701640<br>C -0.620329 1.008173 -0.013454<br>C -1.237659 -0.975558 -0.657519<br>N -1.870077 0.808573 0.490273<br>H -0.045335 1.903894 0.146318<br>C -1.375314 -2.268965 -1.245373<br>C -2.282936 -0.447123 0.094089<br>N -3.464321 -1.020298 0.380708<br>O -0.582087 -2.885715 -1.948128<br>N -2.629929 -2.823880 -0.909982<br>C -3.603660 -2.225499 -0.143563<br>H -2.805931 -3.739283 -1.306983<br>N -4.754535 -2.904977 0.036768<br>H -4.818235 -3.889580 -0.168469<br>H -5.412549 -2.527808 0.700953<br>C -2.670411 1.780971 1.289986<br>C -3.774598 2.412537 0.442812<br>H -3.032437 1.234859 2.159851<br>C -2.090734 4.024408 0.913274<br>C -3.035752 3.590403 -0.204556<br>H -4.562704 2.764771 1.111803<br>H -4.208747 1.709772 -0.266008<br>H -2.553790 4.752839 1.582466<br>H -1.135916 4.414140 0.560535<br>H -3.706319 4.392603 -0.510755<br>H -2.475495 3.259650 -1.082089<br>O -1.820162 2.818497 1.692302<br>H 1.099870 -2.238967 0.028359<br>H 4.858305 0.007692 1.349467<br>H 3.573823 -1.325120 3.257575 | <b>Eqn'-Q(H)-GR'(TS)</b><br>C -1.830346 -1.862392 -2.464932<br>C -2.586760 -1.039804 -1.452687<br>H -1.514750 -1.236299 -3.304119<br>H -2.466810 -2.649992 -2.879378<br>H -0.939202 -2.331051 -2.058014<br>C -2.210324 -0.970156 -0.102068<br>C -3.707675 -0.298680 -1.891719<br>C -4.398717 0.510636 -0.987710<br>C -2.910632 -0.136015 0.790140<br>C -1.029918 -1.713697 0.419244<br>C -4.156574 -0.366135 -3.326392<br>C -4.003401 0.601808 0.339217<br>C -0.828302 -1.833286 1.821482<br>C -2.504305 -0.030570 2.216846<br>H -0.763619 -2.597917 -0.143178<br>H -3.375296 -0.007922 -4.003878<br>H -5.047831 0.241569 -3.483797<br>H -4.385145 -1.393675 -3.624291<br>C -1.464186 -1.022943 2.764375<br>H -0.085921 -2.543595 2.167054<br>O -2.993789 0.814145 2.952629<br>O -1.285656 -1.052952 4.006764<br>N 0.334745 -0.699232 -0.286864<br>C 0.278090 0.597513 -0.517184<br>C 1.670949 -1.050664 -0.246871<br>N 1.530636 1.123140 -0.637463<br>H -0.621187 1.181380 -0.600139<br>C 2.322394 -2.306535 -0.058049<br>C 2.431832 0.092053 -0.472153<br>N 3.770799 0.193356 -0.533261<br>O 1.831621 -3.413635 0.130597<br>N 3.725327 -2.138901 -0.116284<br>C 4.392826 -0.957085 -0.340687<br>H 4.257621 -2.990021 0.021930<br>N 5.740523 -0.992405 -0.328701<br>H 6.244780 -1.863487 -0.372463<br>H 6.227010 -0.158644 -0.618938<br>C 1.868132 2.558068 -0.866476<br>C 2.411874 3.199740 0.409290<br>H 2.556639 2.583443 -1.709815<br>C 0.227851 4.025235 -0.049206<br>C 1.119151 3.616707 1.121785<br>H 3.004395 4.073279 0.128923<br>H 3.041687 2.521052 0.981430<br>H 0.346941 5.079411 -0.308201<br>H -0.829561 3.808518 0.103082<br>H 1.270541 4.433010 1.827224<br>H 0.687908 2.772248 1.664122<br>O 0.687302 3.237494 -1.191205<br>H -5.254947 1.078131 -1.334459<br>H -4.535026 1.235671 1.037168 |
| <b>E'-Q(H)-AR'(TS)</b><br>N -0.696594 3.290915 -0.403903<br>C -0.033487 2.218505 -0.016733<br>N -0.508963 0.972314 0.116925<br>C -1.823416 0.826283 -0.172611<br>C -2.619878 1.905232 -0.565892<br>C -2.017108 3.173864 -0.686431                                                                                                                                                                                                                                                                                                                                                                                                                                                                                                                                                                                                                                                                                                                                                                                                                                                                                                                                                                                                                                                                                                                                                                                                                                                                                                                                                                                                                                                                                                                                                                                                                                                                                                               | <b>Eq'-Q(H)-AR'(TS)</b><br>N -0.463810 3.288368 -0.406275<br>C 0.112432 2.217296 0.106196<br>N -0.417724 0.994547 0.239580<br>C -1.696427 0.871462 -0.187714<br>C -2.396453 1.946534 -0.743208<br>C -1.738797 3.189232 -0.854122                                                                                                                                                                                                                                                                                                                                                                                                                                                                                                                                                                                                                                                                                                                                                                                                                                                                                                                                                                                                                                                                                                                                                                                                                                                                                                                                                                                                                                                                                                                                                                                                                                        | <b>Eqn'-Q(H)-AR'(TS)</b><br>N 0.021405 2.991203 -1.058267<br>C 0.486293 1.808384 -0.714570<br>N -0.227512 0.703832 -0.414784<br>C -1.575865 0.861091 -0.500230<br>C -2.161508 2.091094 -0.803110<br>C -1.319865 3.184959 -1.091007                                                                                                                                                                                                                                                                                                                                                                                                                                                                                                                                                                                                                                                                                                                                                                                                                                                                                                                                                                                                                                                                                                                                                                                                                                                                                                                                                                                                                                                                                                                                                                             |



|                                                                                                                                                                                                                                                                                                                                                                                                                                                                                                                                                                                                                                                                                                                                                                                                                                                                                                                                                                                                                                                                                                                                                                                                                                                                                                                                                                                                                                                                                                                                                                                                                                                                                  |                                                                                                                                                                                                                                                                                                                                                                                                                                                                                                                                                                                                                                                                                                                                                                                                                                                                                                                                                                                                                                                                                                                                                                                                                                                                                                                                                                                                                                                                                                                                                                                                            |                                                                                                                                                                                                                                                                                                                                                                                                                                                                                                                                                                                                                                                                                                                                                                                                                                                                                                                                                                                                                                                                                                                                                                                                                                                                                                                                                                                                                                                                                                                                             |
|----------------------------------------------------------------------------------------------------------------------------------------------------------------------------------------------------------------------------------------------------------------------------------------------------------------------------------------------------------------------------------------------------------------------------------------------------------------------------------------------------------------------------------------------------------------------------------------------------------------------------------------------------------------------------------------------------------------------------------------------------------------------------------------------------------------------------------------------------------------------------------------------------------------------------------------------------------------------------------------------------------------------------------------------------------------------------------------------------------------------------------------------------------------------------------------------------------------------------------------------------------------------------------------------------------------------------------------------------------------------------------------------------------------------------------------------------------------------------------------------------------------------------------------------------------------------------------------------------------------------------------------------------------------------------------|------------------------------------------------------------------------------------------------------------------------------------------------------------------------------------------------------------------------------------------------------------------------------------------------------------------------------------------------------------------------------------------------------------------------------------------------------------------------------------------------------------------------------------------------------------------------------------------------------------------------------------------------------------------------------------------------------------------------------------------------------------------------------------------------------------------------------------------------------------------------------------------------------------------------------------------------------------------------------------------------------------------------------------------------------------------------------------------------------------------------------------------------------------------------------------------------------------------------------------------------------------------------------------------------------------------------------------------------------------------------------------------------------------------------------------------------------------------------------------------------------------------------------------------------------------------------------------------------------------|---------------------------------------------------------------------------------------------------------------------------------------------------------------------------------------------------------------------------------------------------------------------------------------------------------------------------------------------------------------------------------------------------------------------------------------------------------------------------------------------------------------------------------------------------------------------------------------------------------------------------------------------------------------------------------------------------------------------------------------------------------------------------------------------------------------------------------------------------------------------------------------------------------------------------------------------------------------------------------------------------------------------------------------------------------------------------------------------------------------------------------------------------------------------------------------------------------------------------------------------------------------------------------------------------------------------------------------------------------------------------------------------------------------------------------------------------------------------------------------------------------------------------------------------|
| N -2.653428 -0.272977 -0.188170<br>C -3.898131 0.204188 -0.576341<br>N -3.912078 1.490154 -0.810942<br>C -2.593191 -2.963572 2.056931<br>C -2.287422 -1.655905 0.126310<br>C -3.353225 -2.706642 -0.175242<br>C -2.983239 -3.795840 0.838012<br>O -2.000193 -1.752668 1.516651<br>H -4.744114 -0.452623 -0.681954<br>H -1.852022 -3.438934 2.698640<br>H -3.465273 -2.685007 2.655175<br>H -1.379616 -1.867195 -0.443405<br>H -3.323343 -3.032111 -1.213951<br>H -4.351234 -2.329658 0.050700<br>H -3.810456 -4.474767 1.043348<br>H -2.132069 -4.381320 0.482811<br>N -2.691552 4.260155 -1.069509<br>H -3.674381 4.206415 -1.285613<br>H -2.216511 5.146400 -1.143742<br>C 1.014535 0.336591 2.153351<br>C 2.243354 0.942387 2.388428<br>C 0.641296 -0.194226 0.879006<br>C 3.229330 0.936525 1.203399<br>O 2.636281 1.454936 3.468754<br>C 1.679779 -0.381623 -0.184620<br>C 2.904217 0.160686 -0.024459<br>O 4.288497 1.542481 1.286209<br>C 1.335379 -1.249830 -1.382021<br>C 4.036892 -0.028865 -0.998480<br>C 2.610902 -1.875409 -1.989261<br>C 0.519866 -0.504269 -2.459791<br>H 0.714624 -2.074481 -1.011544<br>C 3.633291 -0.768370 -2.276236<br>H 4.834572 -0.570018 -0.475937<br>H 4.467110 0.947215 -1.237550<br>C 3.184074 -2.979954 -1.093891<br>H 2.323502 -2.332721 -2.941407<br>H 0.410224 -1.143603 -3.339021<br>H 1.016400 0.418632 -2.765248<br>H -0.480512 -0.242023 -2.120873<br>H 4.522010 -1.191249 -2.752551<br>H 3.205346 -0.059786 -2.990388<br>H 2.456769 -3.785902 -0.962434<br>H 3.445996 -2.605184 -0.101216<br>H 4.086406 -3.408183 -1.539206<br>H 1.012609 2.342056 0.233051<br>H 0.284135 0.295721 2.954184<br>H -0.051471 -1.022121 0.943855 | N -2.571491 -0.191748 -0.209987<br>C -3.738940 0.296951 -0.779123<br>N -3.668469 1.560591 -1.108754<br>C -2.786035 -2.484665 2.403523<br>C -2.327369 -1.547810 0.295596<br>C -3.497238 -2.518901 0.143776<br>C -3.257700 -3.460151 1.329957<br>O -2.036738 -1.469281 1.685286<br>H -4.594776 -0.336385 -0.937023<br>H -2.118642 -2.925446 3.143120<br>H -3.626018 -2.004010 2.913282<br>H -1.447302 -1.923688 -0.231921<br>H -3.496740 -3.012742 -0.826679<br>H -4.449765 -2.005719 0.281624<br>H -4.157630 -4.000873 1.621821<br>H -2.474452 -4.185312 1.097850<br>N -2.322020 4.268075 -1.380877<br>H -3.269270 4.226057 -1.722197<br>H -1.813230 5.136614 -1.439454<br>C 1.163181 0.281706 2.231768<br>C 2.445221 0.786472 2.433406<br>C 0.715332 -0.228520 0.976740<br>C 3.402328 0.701048 1.226564<br>O 2.906842 1.257655 3.503821<br>C 1.700928 -0.446505 -0.125920<br>C 2.977426 -0.044501 0.018570<br>O 4.503824 1.230332 1.275155<br>C 1.264849 -1.159553 -1.389917<br>C 4.022889 -0.361944 -1.016425<br>C 2.400621 -1.994602 -1.959843<br>C 0.776987 -0.180019 -2.488315<br>H 0.434016 -1.828442 -1.144857<br>C 3.660650 -1.583989 -1.814999<br>H 4.986381 -0.497566 -0.519355<br>H 4.165270 0.504508 -1.678529<br>C 2.006752 -3.228433 -2.719251<br>H -0.143680 0.330562 -2.210472<br>H 0.584827 -0.727380 -3.413176<br>H 1.543637 0.571303 -2.687805<br>H 4.473757 -2.142199 -2.269105<br>H 1.499972 -3.941439 -2.059365<br>H 2.876369 -3.721750 -3.157046<br>H 1.303889 -2.992524 -3.525393<br>H 1.127444 2.319407 0.470338<br>H 0.463142 0.281414 3.059932<br>H -0.017846 -1.019500 1.060976 | N -2.620449 -0.023156 -0.348088<br>C -3.772499 0.731049 -0.526956<br>N -3.535913 1.986581 -0.805182<br>C -3.428237 -2.478687 1.809083<br>C -2.521885 -1.473712 -0.094373<br>C -3.750748 -2.290653 -0.531709<br>C -3.910919 -3.295757 0.618057<br>O -2.315785 -1.715621 1.285716<br>H -4.753122 0.296389 -0.440890<br>H -3.049548 -3.070569 2.640779<br>H -4.202800 -1.794923 2.173168<br>H -1.637995 -1.799986 -0.637481<br>H -3.579604 -2.755511 -1.501158<br>H -4.643856 -1.674882 -0.611234<br>H -4.939166 -3.639974 0.729756<br>H -3.264708 -4.163719 0.470015<br>N -1.787840 4.394875 -1.399026<br>H -2.779859 4.570806 -1.428595<br>H -1.146250 5.146021 -1.601732<br>C 0.453108 -0.059213 1.962336<br>C 1.480233 0.540272 2.681470<br>C 0.565471 -0.487923 0.591019<br>C 2.833425 0.647651 1.969124<br>O 1.407057 0.967344 3.866822<br>C 1.928595 -0.634948 -0.005269<br>C 3.018213 -0.063102 0.672856<br>O 3.749342 1.287268 2.467744<br>C 2.114565 -1.307513 -1.224775<br>C 4.298953 -0.170244 0.132258<br>C 3.417225 -1.414861 -1.757646<br>C 0.935193 -1.905962 -1.951214<br>C 4.488877 -0.839903 -1.066709<br>H 5.133170 0.269323 0.663483<br>C 3.686658 -2.136745 -3.053679<br>H 0.445599 -2.673055 -1.344054<br>H 1.228100 -2.376290 -2.885808<br>H 0.190152 -1.142851 -2.189099<br>H 5.487486 -0.925189 -1.479994<br>H 3.372489 -3.182974 -3.003181<br>H 4.751222 -2.116213 -3.287977<br>H 3.148981 -1.677712 -3.888065<br>H 1.560138 1.696175 -0.645102<br>H -0.516742 -0.170168 2.432667<br>H -0.068132 -1.331615 0.359930 |
| <b>E'-Q(H)-GR'</b><br>C -2.030955 -0.493611 -2.310083<br>C -3.059090 -1.391178 -2.128109<br>C -3.688390 -1.406775 -0.736837<br>C -3.299494 -0.386872 0.273512<br>C -2.304929 0.486678 0.033881<br>C -1.540176 0.438881 -1.270043<br>O -3.522434 -2.201302 -2.996849<br>O -4.525071 -2.257455 -0.444694<br>C -4.037481 -0.443892 1.588096<br>C -3.741837 0.739578 2.513056<br>C -2.263079 1.145515 2.469526<br>C -1.878666 1.542817 1.030846<br>C -2.437622 2.922088 0.627032<br>C -1.340471 0.041997 3.001767<br>N 2.462115 2.761518 -0.869278<br>C 3.475327 1.967897 -0.382287<br>N 3.310519 0.683272 -0.107519<br>C 2.068112 0.239742 -0.332556<br>C 0.986282 0.965473 -0.811195<br>C 1.141532 2.349583 -1.139068<br>N 1.608799 -1.056844 -0.137111<br>C 0.308165 -1.098137 -0.499225                                                                                                                                                                                                                                                                                                                                                                                                                                                                                                                                                                                                                                                                                                                                                                                                                                                                                          | <b>Eq'-Q(H)-GR'</b><br>C -1.983721 -1.143871 -2.067100<br>C -3.041133 -1.961826 -1.737279<br>C -3.787183 -1.605515 -0.453442<br>C -3.377505 -0.417044 0.337577<br>C -2.351470 0.360864 -0.041693<br>C -1.544715 0.028802 -1.274114<br>O -3.451572 -2.971517 -2.398736<br>O -4.732604 -2.290936 -0.072044<br>C -4.161123 -0.128466 1.591209<br>C -3.446810 0.804573 2.524961<br>C -2.433255 1.586203 2.150386<br>C -1.979855 1.620176 0.705341<br>C -2.564438 2.857350 -0.022127<br>C -1.699816 2.491883 3.099364<br>N 2.380065 2.501431 -1.416429<br>C 3.421542 1.857667 -0.788656<br>N 3.295177 0.661237 -0.236027<br>C 2.062315 0.149955 -0.333336<br>C 0.954025 0.728884 -0.935036<br>C 1.067097 2.010211 -1.561434<br>N 1.644092 -1.087218 0.141557<br>C 0.341747 -1.240093 -0.181756                                                                                                                                                                                                                                                                                                                                                                                                                                                                                                                                                                                                                                                                                                                                                                                                                  | <b>Eqn'-Q(H)-GR'</b><br>C 1.693589 -2.169503 -0.767248<br>C 2.597717 -2.041501 -1.799916<br>C 3.487953 -0.807808 -1.761157<br>C 3.443228 0.090730 -0.570858<br>C 2.503895 -0.084290 0.457229<br>C 1.486745 -1.190444 0.327745<br>O 2.758495 -2.859177 -2.764081<br>O 4.249448 -0.559212 -2.690298<br>C 4.370735 1.131706 -0.481438<br>C 4.352397 1.987768 0.607417<br>C 3.419694 1.829822 1.637065<br>C 2.483773 0.777441 1.567673<br>C 1.466699 0.631323 2.673352<br>C 3.424033 2.787649 2.799173<br>N -2.817120 -2.432462 1.382349<br>C -3.756537 -1.542547 0.914735<br>N -3.434322 -0.431111 0.270605<br>C -2.115857 -0.263452 0.113296<br>C -1.101635 -1.107807 0.541855<br>C -1.418409 -2.305580 1.255708<br>N -1.490156 0.808122 -0.509381<br>C -0.154428 0.598676 -0.457984                                                                                                                                                                                                                                                                                                                                                                                                                                                                                                                                                                                                                                                                                                                                                          |

|                                                                                                                                                                                                                                                                                                                                                                                                                                                                                                                                                                                                                                                                                                                                                                                                                                                                                                                                                                                                                                                                                                                                                                                                                                                                                                                      |                                                                                                                                                                                                                                                                                                                                                                                                                                                                                                                                                                                                                                                                                                                                                                                                                                                                                                                                                                                                                                                                                                                                                                                                                                                                                                           |                                                                                                                                                                                                                                                                                                                                                                                                                                                                                                                                                                                                                                                                                                                                                                                                                                                                                                                                                                                                                                                                                                                                                                                                                                                                                                               |
|----------------------------------------------------------------------------------------------------------------------------------------------------------------------------------------------------------------------------------------------------------------------------------------------------------------------------------------------------------------------------------------------------------------------------------------------------------------------------------------------------------------------------------------------------------------------------------------------------------------------------------------------------------------------------------------------------------------------------------------------------------------------------------------------------------------------------------------------------------------------------------------------------------------------------------------------------------------------------------------------------------------------------------------------------------------------------------------------------------------------------------------------------------------------------------------------------------------------------------------------------------------------------------------------------------------------|-----------------------------------------------------------------------------------------------------------------------------------------------------------------------------------------------------------------------------------------------------------------------------------------------------------------------------------------------------------------------------------------------------------------------------------------------------------------------------------------------------------------------------------------------------------------------------------------------------------------------------------------------------------------------------------------------------------------------------------------------------------------------------------------------------------------------------------------------------------------------------------------------------------------------------------------------------------------------------------------------------------------------------------------------------------------------------------------------------------------------------------------------------------------------------------------------------------------------------------------------------------------------------------------------------------|---------------------------------------------------------------------------------------------------------------------------------------------------------------------------------------------------------------------------------------------------------------------------------------------------------------------------------------------------------------------------------------------------------------------------------------------------------------------------------------------------------------------------------------------------------------------------------------------------------------------------------------------------------------------------------------------------------------------------------------------------------------------------------------------------------------------------------------------------------------------------------------------------------------------------------------------------------------------------------------------------------------------------------------------------------------------------------------------------------------------------------------------------------------------------------------------------------------------------------------------------------------------------------------------------------------|
| N -0.093836 0.098314 -0.900923<br>O 0.314026 3.131212 -1.587812<br>N 4.669480 2.541845 -0.171408<br>C 4.700142 -2.332061 0.092216<br>C 2.380851 -2.227145 0.349667<br>C 3.011236 -1.986465 1.733719<br>C 4.422548 -2.569892 1.572237<br>O 3.415034 -2.528600 -0.554044<br>H -1.526248 -0.450721 -3.270490<br>H -1.441614 1.454325 -1.660649<br>H -3.770065 -1.388750 2.075772<br>H -5.110427 -0.519258 1.394459<br>H -4.032078 0.487313 3.536991<br>H -4.356976 1.594279 2.218062<br>H -2.129363 2.030120 3.101156<br>H -0.787103 1.623666 0.998246<br>H -2.092544 3.682400 1.332766<br>H -3.529474 2.922012 0.626056<br>H -2.094720 3.211114 -0.367793<br>H -0.300698 0.380761 3.016044<br>H -1.385704 -0.857349 2.381453<br>H -1.618700 -0.241216 4.020682<br>H 2.648420 3.736889 -1.072330<br>H -0.316116 -1.974601 -0.464026<br>H 5.433425 1.954659 0.123458<br>H 4.870083 3.490221 -0.444363<br>H 5.391083 -3.045281 -0.354580<br>H 5.039347 -1.311219 -0.097117<br>H 1.661896 -3.046507 0.350445<br>H 2.426846 -2.468746 2.515741<br>H 3.056604 -0.918961 1.944889<br>H 5.152020 -2.078403 2.216455<br>H 4.428093 -3.639660 1.792631                                                                                                                                                                           | N -0.100737 -0.166771 -0.820222<br>O 0.212144 2.654542 -2.153988<br>N 4.602470 2.492933 -0.726894<br>C 4.774675 -2.233491 0.491958<br>C 2.465099 -2.117710 0.825445<br>C 3.143350 -1.587510 2.101615<br>C 4.562283 -2.166496 2.000018<br>O 3.470362 -2.579186 -0.043284<br>H -1.418287 -1.348325 -2.971280<br>H -1.469579 0.925759 -1.894772<br>H -4.379414 -1.075086 2.094081<br>H -5.148134 0.274606 1.322277<br>H -3.784270 0.818080 3.557696<br>H -0.889645 1.729169 0.697039<br>H -2.284432 3.773974 0.501125<br>H -3.654432 2.793504 -0.051048<br>H -2.184399 2.927448 -1.042520<br>H -0.638197 2.223629 3.145229<br>H -2.113824 2.431480 4.107520<br>H -1.745673 3.536205 2.773512<br>H 2.536090 3.412761 -1.831706<br>H -0.255270 -2.107412 0.043418<br>H 5.388494 1.989135 -0.347250<br>H 4.782917 3.344814 -1.233177<br>H 5.464726 -3.012259 0.170851<br>H 5.081623 -1.268470 0.082604<br>H 1.769788 -2.933172 1.025158<br>H 2.604112 -1.910523 2.990704<br>H 3.168533 -0.498838 2.088507<br>H 5.303687 -1.540409 2.496990<br>H 4.604834 -3.167851 2.434153                                                                                                                                                                                                                                     | N 0.107703 -0.535388 0.173850<br>O -0.661324 -3.145749 1.722378<br>N -5.048895 -1.835887 1.120218<br>C -4.312573 1.861659 -1.978149<br>C -2.131665 1.983615 -1.148959<br>C -3.038631 2.767010 -0.182297<br>C -4.278107 3.062469 -1.039657<br>O -2.915848 1.564281 -2.238701<br>H 1.034023 -3.031652 -0.757469<br>H 1.386219 -1.715453 1.278237<br>H 5.070922 2.797726 0.666980<br>H 0.657769 1.361121 2.557917<br>H 1.922189 0.812259 3.647818<br>H 1.012283 -0.356826 2.705243<br>H 2.450426 3.270892 2.921670<br>H 4.175230 3.564922 2.656489<br>H 3.644062 2.273762 3.740109<br>H -3.122637 -3.264357 1.874143<br>H 0.586007 1.261907 -0.870947<br>H -5.742434 -1.168067 0.823338<br>H -5.346417 -2.633926 1.657149<br>H -4.778934 2.059438 -2.942074<br>H -4.778082 0.993038 -1.507152<br>H -1.299367 2.580295 -1.522505<br>H -2.537065 3.662580 0.181053<br>H -3.299966 2.145859 0.673299<br>H -5.186011 3.149709 -0.442320<br>H -4.145679 3.985420 -1.608547<br>H 5.095119 1.255690 -1.275804                                                                                                                                                                                                                                                                                                           |
| <b>E'-Q(H)-AR'</b><br>N -0.861935 3.232024 0.492070<br>C -0.122981 2.179815 0.728178<br>N -0.454457 0.885299 0.489109<br>C -1.693437 0.676342 -0.040525<br>C -2.538127 1.753856 -0.322010<br>C -2.098541 3.064270 -0.046678<br>N -2.387451 -0.452479 -0.406959<br>C -3.608330 0.007708 -0.885180<br>N -3.728029 1.308020 -0.852221<br>C -2.907661 -2.743742 1.783138<br>C -1.991067 -1.879239 -0.203633<br>C -3.079858 -2.868813 -0.602725<br>C -3.938920 -2.947770 0.667700<br>O -1.752931 -2.102346 1.160583<br>H -4.360536 -0.671532 -1.246942<br>H -2.556464 -3.686884 2.203946<br>H -3.263974 -2.099763 2.587041<br>H -1.063595 -2.028670 -0.751481<br>H -2.580710 -3.821536 -0.786351<br>H -3.620736 -2.605810 -1.509007<br>H -4.692247 -2.158363 0.685590<br>H -4.452611 -3.904043 0.757142<br>N -2.840387 4.140222 -0.289444<br>H -3.761215 4.050701 -0.690713<br>H -2.481265 5.058269 -0.074798<br>C 1.080958 -0.032133 2.174678<br>C 2.395448 0.073816 2.569562<br>C 0.633478 -0.160379 0.767266<br>C 3.424000 0.069229 1.444883<br>O 2.820804 0.157455 3.768465<br>C 1.684809 -0.078381 -0.311030<br>C 2.988175 -0.034825 0.025701<br>O 4.623732 0.142573 1.701736<br>C 1.231312 -0.166346 -1.758521<br>C 4.103325 -0.159142 -0.983801<br>C 2.290377 -0.903247 -2.607578<br>C 0.905689 1.218494 -2.360390 | <b>Eq'-Q(H)-AR'</b><br>N 0.433397 3.322103 0.694786<br>C -0.227321 2.366411 0.097052<br>N 0.269159 1.166632 -0.297565<br>C 1.600013 0.970238 -0.080639<br>C 2.367005 1.937477 0.577802<br>C 1.752918 3.142323 0.974505<br>N 2.464175 -0.045585 -0.393859<br>C 3.699488 0.351950 0.100373<br>N 3.675085 1.522280 0.683703<br>C 3.938736 -2.937480 -1.207786<br>C 2.266814 -1.298443 -1.186057<br>C 1.783664 -2.485274 -0.328545<br>C 2.646164 -3.648241 -0.835773<br>O 3.507452 -1.657366 -1.740571<br>H 4.567503 -0.270805 -0.030845<br>H 4.516017 -3.426975 -1.989802<br>H 4.578704 -2.771412 -0.334937<br>H 1.591901 -1.041381 -2.001699<br>H 0.716787 -2.669062 -0.443753<br>H 1.987956 -2.281188 0.723898<br>H 2.792352 -4.418592 -0.078901<br>H 2.197179 -4.106267 -1.719460<br>N 2.407582 4.114222 1.601990<br>H 3.387474 4.017741 1.819877<br>H 1.925533 4.963184 1.856372<br>C -1.298097 0.694169 -2.141428<br>C -2.647311 0.822445 -2.392682<br>C -0.725018 0.158812 -0.884462<br>C -3.580430 0.381455 -1.267690<br>O -3.178115 1.264163 -3.461862<br>C -1.691885 -0.261011 0.190929<br>C -3.015463 -0.222360 -0.034746<br>O -4.796081 0.515591 -1.376843<br>C -1.134847 -0.815209 1.487150<br>C -3.983203 -0.818681 0.954314<br>C -2.025569 -1.920901 2.028276<br>C -0.972952 0.275933 2.576060 | <b>Eqn'-Q(H)-AR'</b><br>N -0.004716 3.077588 -0.901088<br>C -0.514794 1.885528 -0.723077<br>N 0.168088 0.751353 -0.432674<br>C 1.524196 0.877761 -0.364289<br>C 2.141253 2.120770 -0.532086<br>C 1.339794 3.247557 -0.804678<br>N 2.537978 -0.017682 -0.141464<br>C 3.707709 0.728955 -0.178512<br>N 3.506651 2.000814 -0.408204<br>C 4.483315 -2.596297 0.752361<br>C 2.524674 -1.491853 0.095396<br>C 2.389043 -1.858707 1.586486<br>C 3.407558 -2.993881 1.752672<br>O 3.751100 -2.012275 -0.356907<br>H 4.664758 0.254189 -0.046290<br>H 5.056652 -3.429457 0.350230<br>H 5.170591 -1.851610 1.167685<br>H 1.729979 -1.900328 -0.524978<br>H 1.374336 -2.159792 1.843446<br>H 2.659671 -0.998699 2.201766<br>H 3.787588 -3.067055 2.771479<br>H 2.966532 -3.953007 1.473800<br>N 1.842209 4.467507 -0.974640<br>H 2.835602 4.628614 -0.912244<br>H 1.227425 5.241778 -1.175006<br>C -0.612051 -1.249143 -1.657813<br>C -1.742735 -1.532413 -2.396730<br>C -0.580868 -0.597795 -0.328198<br>C -3.071261 -1.146700 -1.762145<br>O -1.767765 -2.077744 -3.544875<br>C -1.910405 -0.368757 0.352448<br>C -3.089498 -0.632962 -0.362548<br>O -4.118436 -1.264059 -2.388609<br>C -1.965533 0.110430 1.673331<br>C 4.326219 -0.414875 0.249137<br>C -3.222458 0.339972 2.269890<br>C -0.720508 0.424544 2.465665 |

|                                                                                                                                                                                                                                                                                                                                                                                                                                                                                                                                                                                                                                                                                                                                                                                                                                                                                                                                                                                                                                                                                                                                                                                                                                                                                                                                                                                                                                                                                                                                                                                                                                                                                                                                                                                                                                                                                     |                                                                                                                                                                                                                                                                                                                                                                                                                                                                                                                                                                                                                                                                                                                                                                                                                                                                                                                                                                                                                                                                                                                                                                                                                                                                                                                                                                                                                                                                                                                                                                                                                                                                                                                                                                                                                                                                               |                                                                                                                                                                                                                                                                                                                                                                                                                                                                                                                                                                                                                                                                                                                                                                                                                                                                                                                                                                                                                                                                                                                                                                                                                                                                                                                                                                                                                                                                                                                                                                                                                                                                                                                                                                                                                                                    |
|-------------------------------------------------------------------------------------------------------------------------------------------------------------------------------------------------------------------------------------------------------------------------------------------------------------------------------------------------------------------------------------------------------------------------------------------------------------------------------------------------------------------------------------------------------------------------------------------------------------------------------------------------------------------------------------------------------------------------------------------------------------------------------------------------------------------------------------------------------------------------------------------------------------------------------------------------------------------------------------------------------------------------------------------------------------------------------------------------------------------------------------------------------------------------------------------------------------------------------------------------------------------------------------------------------------------------------------------------------------------------------------------------------------------------------------------------------------------------------------------------------------------------------------------------------------------------------------------------------------------------------------------------------------------------------------------------------------------------------------------------------------------------------------------------------------------------------------------------------------------------------------|-------------------------------------------------------------------------------------------------------------------------------------------------------------------------------------------------------------------------------------------------------------------------------------------------------------------------------------------------------------------------------------------------------------------------------------------------------------------------------------------------------------------------------------------------------------------------------------------------------------------------------------------------------------------------------------------------------------------------------------------------------------------------------------------------------------------------------------------------------------------------------------------------------------------------------------------------------------------------------------------------------------------------------------------------------------------------------------------------------------------------------------------------------------------------------------------------------------------------------------------------------------------------------------------------------------------------------------------------------------------------------------------------------------------------------------------------------------------------------------------------------------------------------------------------------------------------------------------------------------------------------------------------------------------------------------------------------------------------------------------------------------------------------------------------------------------------------------------------------------------------------|----------------------------------------------------------------------------------------------------------------------------------------------------------------------------------------------------------------------------------------------------------------------------------------------------------------------------------------------------------------------------------------------------------------------------------------------------------------------------------------------------------------------------------------------------------------------------------------------------------------------------------------------------------------------------------------------------------------------------------------------------------------------------------------------------------------------------------------------------------------------------------------------------------------------------------------------------------------------------------------------------------------------------------------------------------------------------------------------------------------------------------------------------------------------------------------------------------------------------------------------------------------------------------------------------------------------------------------------------------------------------------------------------------------------------------------------------------------------------------------------------------------------------------------------------------------------------------------------------------------------------------------------------------------------------------------------------------------------------------------------------------------------------------------------------------------------------------------------------|
| H 0.311587 -0.759815 -1.796346<br>C 3.642032 -0.196579 -2.445172<br>H 4.657002 -1.071710 -0.734144<br>H 4.818551 0.652756 -0.830715<br>C 2.363330 -2.393420 -2.257878<br>H 1.981669 -0.818298 -3.654736<br>H 0.740142 1.120275 -3.436176<br>H 1.723484 1.923026 -2.201856<br>H 0.003533 1.656345 -1.934900<br>H 4.400241 -0.696379 -3.054471<br>H 3.560731 0.822761 -2.830715<br>H 1.398819 -2.879753 -2.429446<br>H 2.634063 -2.552428 -1.210990<br>H 3.110086 -2.897827 -2.877277<br>H 0.861542 2.311024 1.158475<br>H 0.299955 -0.080111 2.927250<br>H 0.120839 -1.112381 0.641549                                                                                                                                                                                                                                                                                                                                                                                                                                                                                                                                                                                                                                                                                                                                                                                                                                                                                                                                                                                                                                                                                                                                                                                                                                                                                               | H -0.142401 -1.232422 1.294839<br>C -3.339768 -1.876315 1.808028<br>H -4.834865 -1.231416 0.408457<br>H -4.409902 -0.022609 1.581311<br>C -1.350441 -2.986401 2.842929<br>H -0.692554 -0.185125 3.525090<br>H -1.913893 0.810734 2.718539<br>H -0.197119 0.999384 2.325631<br>H -3.990624 -2.630930 2.239605<br>H -0.632858 -3.543576 2.230429<br>H -2.074368 -3.692783 3.253145<br>H -0.783925 -2.554059 3.674587<br>H -1.279951 2.504911 -0.114674<br>H -0.585027 0.979993 -2.908278<br>H -0.110741 -0.719377 -1.084270                                                                                                                                                                                                                                                                                                                                                                                                                                                                                                                                                                                                                                                                                                                                                                                                                                                                                                                                                                                                                                                                                                                                                                                                                                                                                                                                                     | C -4.386508 0.069545 1.544794<br>C -3.328966 0.874637 3.673732<br>H -0.837695 0.130158 3.508928<br>H -0.509812 1.499333 2.456413<br>H 0.163085 -0.082620 2.088375<br>H -5.350275 0.244375 2.009774<br>H -2.907197 0.174203 4.401365<br>H -4.371185 1.050120 3.941325<br>H -2.783786 1.816085 3.785485<br>H -1.586757 1.766259 -0.800913<br>H 0.350581 -1.479617 -2.104874<br>H 0.043043 -1.157163 0.368071<br>H -5.228229 -0.628102 -0.309234                                                                                                                                                                                                                                                                                                                                                                                                                                                                                                                                                                                                                                                                                                                                                                                                                                                                                                                                                                                                                                                                                                                                                                                                                                                                                                                                                                                                      |
| <b>E'-Q(H)H<sup>+</sup>-GR'</b><br>C -1.902821 -0.324238 -2.269692<br>C -3.015318 -1.059659 -2.187768<br>C -3.818913 -1.115619 -0.939899<br>C -3.399127 -0.314394 0.217033<br>C -2.285603 0.444419 0.150682<br>C -1.449497 0.500845 -1.111815<br>O -3.490134 -1.807157 -3.204731<br>O -4.814058 -1.839863 -0.933548<br>C -4.247431 -0.437184 1.455874<br>C -3.889674 0.582972 2.539212<br>C -2.373754 0.793471 2.647382<br>C -1.820966 1.307554 1.302249<br>C -2.177669 2.786663 1.041735<br>C -1.640653 -0.474932 3.100697<br>N 2.524805 2.786443 -0.816645<br>C 3.553577 1.982134 -0.379840<br>N 3.393747 0.693325 -0.112941<br>C 2.144282 0.256962 -0.294274<br>C 1.051144 0.994075 -0.721178<br>C 1.194842 2.382142 -1.034446<br>N 1.683394 -1.040317 -0.091918<br>C 0.372380 -1.073804 -0.398270<br>N -0.037646 0.134551 -0.773391<br>O 0.344126 3.165685 -1.434057<br>N 4.756995 2.545452 -0.211834<br>C 4.772978 -2.329911 -0.061285<br>C 2.475070 -2.225426 0.338878<br>C 3.186543 -2.001680 1.685589<br>C 4.587071 -2.579430 1.430904<br>O 3.448670 -2.519839 -0.628032<br>H -1.306904 -0.291780 -3.173483<br>H -1.374751 1.545910 -1.427713<br>H -4.295573 -2.241320 -2.867623<br>H -4.133629 -1.459791 1.834071<br>H -5.300179 -0.348995 1.176749<br>H -4.291779 0.251919 3.500138<br>H -4.371750 1.537501 2.311921<br>H -2.187912 1.574079 3.391705<br>H -0.728720 1.250416 1.355593<br>H -1.815221 3.399545 1.870440<br>H -3.257175 2.923395 0.956194<br>H -1.712584 3.155443 0.126200<br>H -0.572286 -0.279678 3.227447<br>H -1.743719 -1.286694 2.375248<br>H -2.035948 -0.830307 4.055999<br>H 2.705756 3.764754 -1.011554<br>H -0.251857 -1.949318 -0.338694<br>H 5.526976 1.952914 0.056070<br>H 4.951032 3.499493 -0.469934<br>H 5.432176 -3.041147 -0.556267<br>H 5.101665 -1.308553 0.264596<br>H 1.749563 -3.038056 0.372965<br>H 2.651436 -2.497693 2.493678 | <b>Eq'-Q(H)H<sup>+</sup>-GR'</b><br>C -1.940885 -0.964046 -2.076300<br>C -3.076522 -1.627641 -1.838234<br>C -3.901474 -1.351497 -0.634059<br>C -3.452328 -3.320254 0.307025<br>C -2.326123 0.377366 0.071270<br>C -1.488061 0.125524 -1.162157<br>O -3.557385 -2.591870 -2.648913<br>O -4.930707 -2.007593 -0.479000<br>C -4.288827 -0.095972 1.535676<br>C -3.547996 0.650131 2.606293<br>C -2.436748 1.351957 2.381874<br>C -1.875601 1.493682 0.980877<br>C -2.262823 2.864029 0.366902<br>C -1.683106 2.064023 3.469373<br>N 2.453854 2.443704 -1.536110<br>C 3.501588 1.787269 -0.929343<br>N 3.362429 0.612650 -0.329687<br>C 2.115897 0.134234 -0.365718<br>C 1.006098 0.726907 -0.946359<br>C 1.124672 1.988765 -1.608382<br>N 1.674723 -1.069127 0.176722<br>C 0.358759 -1.190447 -0.081916<br>N -0.072767 -0.124489 -0.750653<br>O 0.253932 2.637766 -2.172604<br>N 4.705100 2.372673 -0.958511<br>C 4.785475 -2.277615 0.499594<br>C 2.489724 -2.094121 0.885161<br>C 3.211070 -1.524279 2.119684<br>C 4.613066 -2.141582 2.007974<br>O 3.458509 -2.612299 0.011776<br>H -1.333103 -1.171557 -2.948408<br>H -1.429419 1.059740 -1.730485<br>H -4.384852 -2.903924 -2.238556<br>H -4.628384 -1.065404 1.912380<br>H -5.209755 0.435085 1.256898<br>H -3.953983 0.590149 3.611588<br>H -0.782481 1.470894 1.052026<br>H -1.932687 3.673581 1.019955<br>H -3.346620 2.930074 0.251901<br>H -1.792400 3.009318 -0.607064<br>H -0.660384 1.678054 3.544798<br>H -2.171013 1.938653 4.437322<br>H -1.600763 3.136221 3.264724<br>H 2.620553 3.334477 -1.990526<br>H -0.253080 -2.025650 0.214896<br>H 5.476630 1.903222 -0.511543<br>H 4.866269 3.270364 -1.385468<br>H 5.446615 -3.087249 0.194970<br>H 5.104566 -1.339339 0.040904<br>H 1.778581 -2.881249 1.136011<br>H 2.687023 -1.795010 3.034803<br>H 3.261212 -0.438079 2.058073<br>H 5.380866 -1.512750 2.459069 | <b>Eqn'-Q(H)H<sup>+</sup>-GR'</b><br>C -1.734724 2.091494 -0.784596<br>C -2.753273 1.937826 -1.636495<br>C -3.683147 0.785512 -1.547432<br>C -3.498217 -0.171823 -0.448253<br>C -2.456972 -0.015847 0.484175<br>C -1.463975 1.113734 0.315114<br>O -3.013030 2.803021 -2.638227<br>O -4.571510 0.698528 -2.393106<br>C -4.394430 -1.235709 -0.321402<br>C -4.244610 -2.138680 0.715587<br>C -3.222441 -1.994105 1.660157<br>C -2.323330 -0.911369 1.556711<br>C -1.230385 -0.761351 2.585623<br>C -3.095902 -2.998743 2.773070<br>N 2.764663 2.380634 1.537777<br>C 3.730581 1.539631 1.031774<br>N 3.442977 0.477447 0.291920<br>C 2.134624 0.305962 0.082633<br>C 1.099761 1.101786 0.546619<br>C 1.375141 2.245210 1.358567<br>N 1.538804 -0.723406 -0.639154<br>C 0.203977 -0.538794 -0.611793<br>N -0.090889 0.541705 0.103417<br>O 0.582521 3.031642 1.859112<br>N 5.010447 1.827899 1.300565<br>C 4.420964 -1.629031 -2.088055<br>C 2.216420 -1.842771 -1.348282<br>C 3.100003 -2.686750 -0.411766<br>C 4.373708 -2.897469 -1.243981<br>O 3.027974 -1.330414 -2.372503<br>H -1.057799 2.932836 -0.872084<br>H -1.374760 1.669475 1.250343<br>H -4.931515 -2.971900 0.805916<br>H -0.377085 -1.407077 2.352253<br>H -1.587586 -1.049253 3.574106<br>H -0.860254 0.259661 2.662444<br>H -2.094969 -3.437863 2.799993<br>H -3.820883 -3.803429 2.651614<br>H -3.266825 -2.533523 3.748747<br>H 3.043322 3.177391 2.099152<br>H -0.516293 -1.179458 -1.091361<br>H 5.721387 1.194685 0.970178<br>H 5.282614 2.583740 1.907836<br>H 4.920182 -1.747859 -3.048311<br>H 4.857088 -0.791852 -1.538941<br>H 1.401843 -2.415410 -1.791801<br>H 2.599997 -3.614444 -0.138339<br>H 3.320478 -2.131836 0.499093<br>H 5.261257 -3.016123 -0.622169<br>H 4.277249 -3.776636 -1.884703<br>H -3.794360 2.452228 -3.103914<br>H -5.195369 -1.337790 -1.041776 |

|                                                                                                                                                                                                                                                                                                                                                                                                                                                                                                                                                                                                                                                                                                                                                                                                                                                                                                                                                                                                                                                                                                                                                                                                                                                                                                                                                                                                                                                                                                                                                                                                                                                                                                                                                                                                                                                                                                                                                          |                                                                                                                                                                                                                                                                                                                                                                                                                                                                                                                                                                                                                                                                                                                                                                                                                                                                                                                                                                                                                                                                                                                                                                                                                                                                                                                                                                                                                                                                                                                                                                                                                                                                                                                                                                                                                                                                                     |                                                                                                                                                                                                                                                                                                                                                                                                                                                                                                                                                                                                                                                                                                                                                                                                                                                                                                                                                                                                                                                                                                                                                                                                                                                                                                                                                                                                                                                                                                                                                                                                                                                                                                                                                                                                             |
|----------------------------------------------------------------------------------------------------------------------------------------------------------------------------------------------------------------------------------------------------------------------------------------------------------------------------------------------------------------------------------------------------------------------------------------------------------------------------------------------------------------------------------------------------------------------------------------------------------------------------------------------------------------------------------------------------------------------------------------------------------------------------------------------------------------------------------------------------------------------------------------------------------------------------------------------------------------------------------------------------------------------------------------------------------------------------------------------------------------------------------------------------------------------------------------------------------------------------------------------------------------------------------------------------------------------------------------------------------------------------------------------------------------------------------------------------------------------------------------------------------------------------------------------------------------------------------------------------------------------------------------------------------------------------------------------------------------------------------------------------------------------------------------------------------------------------------------------------------------------------------------------------------------------------------------------------------|-------------------------------------------------------------------------------------------------------------------------------------------------------------------------------------------------------------------------------------------------------------------------------------------------------------------------------------------------------------------------------------------------------------------------------------------------------------------------------------------------------------------------------------------------------------------------------------------------------------------------------------------------------------------------------------------------------------------------------------------------------------------------------------------------------------------------------------------------------------------------------------------------------------------------------------------------------------------------------------------------------------------------------------------------------------------------------------------------------------------------------------------------------------------------------------------------------------------------------------------------------------------------------------------------------------------------------------------------------------------------------------------------------------------------------------------------------------------------------------------------------------------------------------------------------------------------------------------------------------------------------------------------------------------------------------------------------------------------------------------------------------------------------------------------------------------------------------------------------------------------------------|-------------------------------------------------------------------------------------------------------------------------------------------------------------------------------------------------------------------------------------------------------------------------------------------------------------------------------------------------------------------------------------------------------------------------------------------------------------------------------------------------------------------------------------------------------------------------------------------------------------------------------------------------------------------------------------------------------------------------------------------------------------------------------------------------------------------------------------------------------------------------------------------------------------------------------------------------------------------------------------------------------------------------------------------------------------------------------------------------------------------------------------------------------------------------------------------------------------------------------------------------------------------------------------------------------------------------------------------------------------------------------------------------------------------------------------------------------------------------------------------------------------------------------------------------------------------------------------------------------------------------------------------------------------------------------------------------------------------------------------------------------------------------------------------------------------|
| H 3.242202 -0.937518 1.910024<br>H 5.353475 -2.090379 2.032528<br>H 4.609034 -3.650677 1.642335                                                                                                                                                                                                                                                                                                                                                                                                                                                                                                                                                                                                                                                                                                                                                                                                                                                                                                                                                                                                                                                                                                                                                                                                                                                                                                                                                                                                                                                                                                                                                                                                                                                                                                                                                                                                                                                          | H 4.643309 -3.124123 2.483926                                                                                                                                                                                                                                                                                                                                                                                                                                                                                                                                                                                                                                                                                                                                                                                                                                                                                                                                                                                                                                                                                                                                                                                                                                                                                                                                                                                                                                                                                                                                                                                                                                                                                                                                                                                                                                                       |                                                                                                                                                                                                                                                                                                                                                                                                                                                                                                                                                                                                                                                                                                                                                                                                                                                                                                                                                                                                                                                                                                                                                                                                                                                                                                                                                                                                                                                                                                                                                                                                                                                                                                                                                                                                             |
| <b>E'-Q(H)H<sup>+</sup>-AR'</b><br>N -0.986690 3.126508 0.868392<br>C -0.210499 2.084819 0.962629<br>N -0.502034 0.815158 0.559933<br>C -1.741972 0.632460 0.011165<br>C -2.617043 1.711332 -0.133964<br>C -2.220561 2.990063 0.309850<br>N -2.403525 -0.462031 -0.487167<br>C -3.638166 0.017997 -0.908304<br>N -3.794009 1.300365 -0.714985<br>C -2.727500 -2.916787 1.499348<br>C -1.956616 -1.891436 -0.469593<br>C -3.053738 -2.865907 -0.878113<br>C -3.823646 -3.063696 0.436224<br>O -1.608683 -2.243864 0.841034<br>H -4.371203 -0.633343 -1.351562<br>H -2.349815 -3.877015 1.850974<br>H -3.034947 -2.312709 2.352728<br>H -1.071576 -1.955530 -1.099268<br>H -2.551192 -3.788648 -1.171966<br>H -3.659120 -2.543690 -1.721954<br>H -4.591745 -2.298991 0.562295<br>H -4.308615 -4.037660 0.483114<br>N -2.994446 4.061803 0.208928<br>H -3.913674 3.996646 -0.201809<br>H -2.664977 4.954990 0.544263<br>C 1.022215 -0.287834 2.109335<br>C 2.318639 -0.273002 2.433678<br>C 0.595915 -0.207404 0.681702<br>C 3.371603 -0.129917 1.398422<br>O 2.771879 -0.393043 3.697394<br>C 1.670498 0.030996 -0.354011<br>C 2.975664 0.009193 -0.009242<br>O 4.545058 -0.142911 1.770204<br>H 3.744798 -0.360822 3.639423<br>C 1.232718 0.165506 -1.799793<br>C 4.105028 0.043841 -1.005851<br>C 2.304571 -0.432130 -2.739336<br>C 0.909919 1.627882 -2.179903<br>H 0.314265 -0.415480 -1.934549<br>C 3.654422 0.240470 -2.457680<br>H 4.653864 -0.898445 -0.896600<br>H 4.815139 0.822414 -0.715720<br>C 2.374378 -1.958738 -2.624988<br>H 2.005606 -0.184382 -3.762479<br>H 0.763787 1.696296 -3.260201<br>H 1.720390 2.301503 -1.898683<br>H -0.003147 1.988884 -1.708507<br>H 4.417258 -0.157938 -3.131253<br>H 3.576535 1.308037 -2.676145<br>H 1.413304 -2.411139 -2.884238<br>H 2.631349 -2.282533 -1.613085<br>H 3.130176 -2.359432 -3.305590<br>H 0.775109 2.204076 1.394249<br>H 0.246913 -0.409528 2.855486<br>H 0.135437 -1.165883 0.446873 | <b>Eq'-Q(H)H<sup>+</sup>-AR'</b><br>N 0.623479 3.328878 0.728121<br>C -0.104396 2.407634 0.165888<br>N 0.325386 1.184695 -0.257812<br>C 1.660650 0.931298 -0.103622<br>C 2.492491 1.866131 0.519343<br>C 1.948561 3.095612 0.944447<br>N 2.465394 -0.118376 -0.452528<br>C 3.737055 0.228585 -0.013117<br>N 3.784544 1.398797 0.568394<br>C 3.759265 -3.102847 -1.254377<br>C 2.180186 -1.375436 -1.215716<br>C 1.659453 -2.517773 -0.320432<br>C 2.441426 -3.734585 -0.832024<br>O 3.382673 -1.807557 -1.795161<br>H 4.571625 -0.430102 -0.180366<br>H 4.283129 -3.634704 -2.046072<br>H 4.434660 -2.958671 -0.405035<br>H 1.497556 -1.098344 -2.019098<br>H 0.581367 -2.648063 -0.401190<br>H 1.907374 -2.308011 0.721565<br>H 2.567637 -4.498704 -0.065441<br>H 1.940923 -4.181257 -1.693401<br>N 2.668279 4.037841 1.537520<br>H 3.653126 3.901851 1.709283<br>H 2.233018 4.905286 1.814663<br>C -1.276396 0.811455 -2.062728<br>C -2.599565 0.858557 -2.250355<br>C -0.702423 0.237511 -0.809088<br>C -3.549702 0.366283 -1.219235<br>O -3.172360 1.341459 -3.369064<br>C -1.681358 -0.183348 0.261655<br>C -3.007667 -0.181261 0.028266<br>O -4.752456 0.436511 -1.464252<br>H -4.135222 1.252711 -3.243575<br>C -1.128346 -0.715204 1.566000<br>C -3.975717 -0.782424 1.009769<br>C -2.003676 -1.836229 2.105446<br>C -1.009397 0.392207 2.644432<br>H -0.123925 -1.109783 1.389515<br>C -3.316467 -1.820038 1.875935<br>H -4.812689 -1.216015 0.457363<br>H -4.419908 0.012965 1.624565<br>C -1.313924 -2.880329 2.934817<br>H -0.723975 -0.054905 3.598005<br>H -1.967073 0.899006 2.774411<br>H -0.253159 1.135762 2.394327<br>H -3.956540 -2.581924 2.309082<br>H -0.588868 -3.436908 2.331163<br>H -2.029437 -3.589990 3.353249<br>H -0.755359 -2.428331 3.761036<br>H -1.160269 2.593410 0.013852<br>H -0.583215 1.161068 -2.817640<br>H -0.153529 -0.667300 -1.070123 | <b>Eqn'-Q(H)H<sup>+</sup>-AR'</b><br>N 0.081784 2.923701 -1.374747<br>C -0.455897 1.773694 -1.079671<br>N 0.200240 0.671411 -0.621009<br>C 1.559024 0.787963 -0.511997<br>C 2.196910 1.998463 -0.792431<br>C 1.424953 3.093840 -1.230744<br>N 2.547064 -0.083365 -0.141732<br>C 3.728126 0.645624 -0.208928<br>N 3.552492 1.883485 -0.591110<br>C 4.410161 -2.611445 1.060504<br>C 2.505689 -1.530764 0.229044<br>C 2.303238 -1.759800 1.739266<br>C 3.284052 -2.899379 2.042939<br>O 3.739809 -2.100574 -0.123405<br>H 4.671821 0.180660 0.019556<br>H 4.974323 -3.488944 0.750702<br>H 5.100796 -1.852246 1.441461<br>H 1.731086 -1.985546 -0.385676<br>H 1.272332 -2.013880 1.983515<br>H 2.574491 -0.855003 2.286207<br>H 3.619644 -2.894282 3.079681<br>H 2.829526 -3.868157 1.826371<br>N 1.947648 4.279753 -1.513089<br>H 2.939309 4.440784 -1.421445<br>H 1.352344 5.030467 -1.830201<br>C -0.711447 -1.393511 -1.547379<br>C -1.896398 -1.771197 -2.038444<br>C -0.585062 -0.580221 -0.298822<br>C -3.173131 -1.396707 -1.382132<br>O -2.025310 -2.503047 -3.161020<br>C -1.876685 -0.223345 0.414563<br>C -3.108944 -0.613040 -0.142083<br>O -4.218916 -1.766164 -1.911043<br>H -2.982692 -2.629782 -3.295948<br>C -1.840220 0.485894 1.625689<br>C -4.303122 -0.269653 0.495666<br>C -3.055581 0.847489 2.245610<br>C -0.541977 0.899626 2.271616<br>C -4.269994 0.463369 1.667518<br>C -3.064897 1.642642 3.522938<br>H -0.618387 0.856204 3.357310<br>H -0.277341 1.928865 2.008219<br>H 0.292312 0.262679 1.989128<br>H -5.197246 0.743050 2.153288<br>H -2.615871 1.077372 4.345486<br>H -4.084401 1.900628 3.808811<br>H -2.491427 2.567709 3.420206<br>H -1.526403 1.659617 -1.184432<br>H 0.200320 -1.663329 -2.067168<br>H 0.034680 -1.118024 0.417284<br>H -5.241264 -0.582702 0.056864 |
| <b>E'-Q(H)-G<sup>+</sup>R' (TS)</b><br>C -1.676783 -0.066612 -1.951532<br>C -2.879589 -0.594191 -2.385893<br>C -3.759208 -1.168002 -1.319520<br>C -3.329325 -1.110323 0.075581<br>C -2.147890 -0.524679 0.455828<br>C -1.333885 0.146476 -0.547446<br>O -3.258493 -0.639779 -3.622678<br>O -4.851047 -1.712521 -1.621052<br>C -4.221871 -1.851207 1.050709<br>C -3.756334 -1.842579 2.514038                                                                                                                                                                                                                                                                                                                                                                                                                                                                                                                                                                                                                                                                                                                                                                                                                                                                                                                                                                                                                                                                                                                                                                                                                                                                                                                                                                                                                                                                                                                                                             | <b>Eq'-Q(H)-G<sup>+</sup>R' (TS)</b><br>C -1.700072 -0.271714 -2.021220<br>C -2.912101 -0.801002 -2.431503<br>C -3.832236 -1.252003 -1.336628<br>C -3.394332 -1.124209 0.047126<br>C -2.207836 -0.538275 0.399079<br>C -1.362991 0.040284 -0.632849<br>O -3.275516 -0.936247 -3.664875<br>O -4.955708 -1.742873 -1.607777<br>C -4.277780 -1.737180 1.112414<br>C -3.494179 -2.183394 2.317538                                                                                                                                                                                                                                                                                                                                                                                                                                                                                                                                                                                                                                                                                                                                                                                                                                                                                                                                                                                                                                                                                                                                                                                                                                                                                                                                                                                                                                                                                       | <b>Eqn'-Q(H)-G<sup>+</sup>R' (TS)</b><br>C 1.482563 1.136741 1.739791<br>C 2.587664 0.940427 2.551958<br>C 3.404664 -0.264477 2.242383<br>C 3.086594 -1.058203 1.035325<br>C 1.991856 -0.765697 0.182221<br>C 1.176157 0.412649 0.511371<br>O 2.898529 1.683384 3.564002<br>O 4.350112 -0.604234 2.984602<br>C 3.939317 -2.129576 0.714426<br>C 3.710142 -2.906998 -0.399837                                                                                                                                                                                                                                                                                                                                                                                                                                                                                                                                                                                                                                                                                                                                                                                                                                                                                                                                                                                                                                                                                                                                                                                                                                                                                                                                                                                                                                |

|                                                                                                                                                                                                                                                                                                                                                                                                                                                                                                                                                                                                                                                                                                                                                                                                                                                                                                                                                                                                                                                                                                                                                                                                                                                                                                                                                                                                                                                                                                                                                                                                                                                                                                                                                                                                        |                                                                                                                                                                                                                                                                                                                                                                                                                                                                                                                                                                                                                                                                                                                                                                                                                                                                                                                                                                                                                                                                                                                                                                                                                                                                                                                                                                                                                                                                                                                                                                                                                                                                                                                                      |                                                                                                                                                                                                                                                                                                                                                                                                                                                                                                                                                                                                                                                                                                                                                                                                                                                                                                                                                                                                                                                                                                                                                                                                                                                                                                                                                                                                                                                                                                                                                                                                                                                                                     |
|--------------------------------------------------------------------------------------------------------------------------------------------------------------------------------------------------------------------------------------------------------------------------------------------------------------------------------------------------------------------------------------------------------------------------------------------------------------------------------------------------------------------------------------------------------------------------------------------------------------------------------------------------------------------------------------------------------------------------------------------------------------------------------------------------------------------------------------------------------------------------------------------------------------------------------------------------------------------------------------------------------------------------------------------------------------------------------------------------------------------------------------------------------------------------------------------------------------------------------------------------------------------------------------------------------------------------------------------------------------------------------------------------------------------------------------------------------------------------------------------------------------------------------------------------------------------------------------------------------------------------------------------------------------------------------------------------------------------------------------------------------------------------------------------------------|--------------------------------------------------------------------------------------------------------------------------------------------------------------------------------------------------------------------------------------------------------------------------------------------------------------------------------------------------------------------------------------------------------------------------------------------------------------------------------------------------------------------------------------------------------------------------------------------------------------------------------------------------------------------------------------------------------------------------------------------------------------------------------------------------------------------------------------------------------------------------------------------------------------------------------------------------------------------------------------------------------------------------------------------------------------------------------------------------------------------------------------------------------------------------------------------------------------------------------------------------------------------------------------------------------------------------------------------------------------------------------------------------------------------------------------------------------------------------------------------------------------------------------------------------------------------------------------------------------------------------------------------------------------------------------------------------------------------------------------|-------------------------------------------------------------------------------------------------------------------------------------------------------------------------------------------------------------------------------------------------------------------------------------------------------------------------------------------------------------------------------------------------------------------------------------------------------------------------------------------------------------------------------------------------------------------------------------------------------------------------------------------------------------------------------------------------------------------------------------------------------------------------------------------------------------------------------------------------------------------------------------------------------------------------------------------------------------------------------------------------------------------------------------------------------------------------------------------------------------------------------------------------------------------------------------------------------------------------------------------------------------------------------------------------------------------------------------------------------------------------------------------------------------------------------------------------------------------------------------------------------------------------------------------------------------------------------------------------------------------------------------------------------------------------------------|
| C -2.230163 -1.775699 2.641705<br>C -1.715474 -0.520279 1.910126<br>C -2.166532 0.775645 2.612139<br>C -1.544046 -3.048242 2.131815<br>N 2.387413 2.306776 1.474961<br>C 3.536845 1.603755 1.230347<br>N 3.539955 0.472374 0.550795<br>C 2.325446 0.091671 0.128508<br>C 1.103396 0.734796 0.308883<br>C 1.074597 1.951419 1.075150<br>N 2.069240 -1.052619 -0.610028<br>C 0.748008 -1.082949 -0.873642<br>N 0.130928 -0.035699 -0.339715<br>O 0.139042 2.655084 1.410471<br>N 4.690399 2.081160 1.737897<br>C 5.282890 -1.504772 -1.451533<br>C 3.041491 -2.060384 -1.092906<br>C 3.862635 -2.694991 0.044669<br>C 5.286197 -2.720439 -0.531321<br>O 3.940656 -1.468113 -2.000602<br>H -1.008339 0.372466 -2.687371<br>H -1.663247 1.499303 -0.473680<br>H -4.296981 -2.884059 0.690733<br>H -5.242961 -1.462743 0.982719<br>H -4.135401 -2.734282 3.023573<br>H -4.191474 -0.986754 3.035971<br>H -1.978386 -1.660504 3.702584<br>H -0.621364 -0.545306 1.950952<br>H -1.852534 0.765078 3.661357<br>H -3.253048 0.880785 2.582079<br>H -1.725354 1.644393 2.128540<br>H -0.458662 -2.978829 2.253281<br>H -1.748606 -3.215030 1.071179<br>H -1.890610 -3.926430 2.684611<br>H 2.429544 3.157813 2.023282<br>H 0.248056 -1.842952 -1.448505<br>H 5.543533 1.631835 1.443515<br>H 4.758928 3.023285 2.088447<br>H 5.968210 -1.579861 -2.294623<br>H 5.465906 -0.580058 -0.899842<br>H 2.433785 -2.790375 -1.628081<br>H 3.478254 -3.682438 0.295953<br>H 3.816630 -2.068580 0.934045<br>H 6.050233 -2.653105 0.243699<br>H 5.455355 -3.632500 -1.108126<br>C -1.288159 3.474294 -1.111688<br>O -0.247174 3.134766 -1.686370<br>O -2.111086 2.661027 -0.528290<br>C -1.687543 4.938050 -1.019880<br>H -1.453576 5.299335 -0.013828<br>H -1.135564 5.536856 -1.743902<br>H -2.761256 5.060474 -1.172569 | C -2.341134 -1.607413 2.661144<br>C -1.851653 -0.411261 1.866115<br>C -2.474362 0.877544 2.459786<br>C -1.514975 -2.018355 3.845453<br>N 2.239691 2.222123 1.533093<br>C 3.413296 1.553634 1.305818<br>N 3.465401 0.440077 0.599492<br>C 2.272992 0.037372 0.135189<br>C 1.030769 0.642170 0.301493<br>C 0.949218 1.842645 1.087368<br>N 2.066925 -1.089456 -0.643750<br>C 0.752850 -1.148677 -0.941474<br>N 0.094144 -0.134211 -0.391801<br>O -0.014959 2.514963 1.405255<br>N 4.538340 2.047410 1.859673<br>C 5.308848 -1.408959 -1.436945<br>C 3.080377 -2.048247 -1.140398<br>C 3.901190 -2.694341 -0.009172<br>C 5.334985 -2.654798 -0.558363<br>O 3.976372 -1.396224 -2.010103<br>H -1.013397 0.087855 -2.783210<br>H -1.654268 1.395775 -0.646822<br>H -4.816787 -2.579506 0.672787<br>H -5.065012 -1.028956 1.415909<br>H -3.896201 -3.002003 2.909109<br>H -0.766382 -0.337872 1.976157<br>H -2.195939 0.984904 3.512263<br>H -3.563859 0.824796 2.397681<br>H -2.122350 1.752431 1.917689<br>H -0.515701 -2.339430 3.529369<br>H -1.981377 -2.587053 4.397615<br>H -1.369278 -1.178711 4.534664<br>H 2.245132 3.062347 2.099223<br>H 0.288910 -1.905883 -1.549202<br>H 5.411800 1.628358 1.580723<br>H 4.570209 2.980650 2.238191<br>H 6.011495 -1.433326 -2.268707<br>H 5.452001 -0.498307 -0.851043<br>H 2.507564 -2.778487 -1.712145<br>H 3.544828 -3.701516 0.201944<br>H 3.819031 -2.099785 0.899242<br>H 6.082341 -2.589861 0.232951<br>H 5.544098 -3.540655 -1.162282<br>C -1.138261 3.339339 -1.292799<br>O -0.061379 2.939074 -1.751767<br>O -2.048355 2.578185 -0.773086<br>C -1.479428 4.820293 -1.279394<br>H -2.524096 4.981997 -1.550893<br>H -1.339997 5.200024 -0.262687<br>H -0.827025 5.374874 -1.953310 | C 2.646870 -2.616666 -1.273274<br>C 1.807567 -1.528483 -1.006631<br>C 0.740275 -1.186270 -2.022205<br>C 2.450782 -3.473704 -2.499831<br>N -2.630589 2.981476 -0.176248<br>C -3.760103 2.206404 -0.234320<br>N -3.731574 0.895492 -0.069806<br>C -2.500797 0.402581 0.129778<br>C -1.296543 1.098771 0.176385<br>C -1.309598 2.528736 0.063049<br>N -2.195318 -0.929388 0.344468<br>C -0.856637 -1.022449 0.532415<br>N -0.281556 0.166609 0.411748<br>O -0.398027 3.334292 0.156488<br>N -4.931120 2.818583 -0.493695<br>C -5.378000 -1.815830 0.947240<br>C -3.124277 -2.079950 0.386097<br>C -3.946515 -2.234929 -0.906434<br>C -5.351476 -2.563362 -0.381351<br>O -4.026292 -1.935957 1.459265<br>H 0.812547 1.951982 1.996204<br>H 1.518413 1.275780 -0.595990<br>H 4.778151 -2.327639 1.369476<br>H 4.364954 -3.742554 -0.624386<br>H -0.139156 -1.834836 -1.929940<br>H 1.123099 -1.324858 -3.034784<br>H 0.410534 -0.154527 -1.942737<br>H 1.428512 -3.856776 -2.567977<br>H 3.131804 -4.325972 -2.485694<br>H 2.639987 -2.911856 -3.420765<br>H -2.708251 3.985503 -0.286494<br>H -0.329167 -1.938970 0.727416<br>H -5.769855 2.265439 -0.410579<br>H -5.026751 3.820482 -0.443035<br>H -6.040161 -2.252695 1.693469<br>H -5.613360 -0.757797 0.810529<br>H -2.484629 -2.941459 0.580084<br>H -3.526511 -3.011828 -1.543586<br>H -3.951417 -1.297409 -1.460625<br>H -6.138185 -2.233457 -1.060466<br>H -5.463067 -3.637251 -0.215074<br>C 2.973781 2.046766 -1.944280<br>O 3.932478 1.758888 -1.223373<br>O 1.723381 1.905175 -1.615326<br>C 3.175303 2.604838 -3.343235<br>H 2.565699 3.499332 -3.486845<br>H 4.224472 2.838677 -3.519447<br>H 2.844456 1.862988 -4.075533 |
| <b>E<sup>+</sup>-Q(H)-A<sup>+</sup>R<sup>+</sup> (TS)</b><br>N -1.469373 -3.730246 -0.539629<br>C -0.483538 -2.872413 -0.587713<br>N -0.553072 -1.516060 -0.450344<br>C -1.804889 -1.027728 -0.191409<br>C -2.909767 -1.890486 -0.138886<br>C -2.728183 -3.271524 -0.327992<br>N -2.311998 0.222825 0.068799<br>C -3.677511 0.049417 0.238995<br>N -4.066858 -1.190482 0.124237<br>C -2.579204 3.638187 -0.332735<br>C -1.672351 1.546290 0.191596<br>C -2.010984 2.267370 1.514503<br>C -3.008693 3.358757 1.102383<br>O -2.173872 2.356398 -0.857304<br>H -4.318577 0.891449 0.441842<br>H -1.727952 4.325879 -0.368861<br>H -3.374170 4.012975 -0.976213<br>H -0.605125 1.396358 0.083031                                                                                                                                                                                                                                                                                                                                                                                                                                                                                                                                                                                                                                                                                                                                                                                                                                                                                                                                                                                                                                                                                                           | <b>Eq<sup>+</sup>-Q(H)-A<sup>+</sup>R<sup>+</sup> (TS)</b><br>N -1.697463 -3.663230 -0.429202<br>C -0.645747 -2.888209 -0.483836<br>N -0.615212 -1.524153 -0.439204<br>C -1.837082 -0.927824 -0.277021<br>C -3.007362 -1.697689 -0.222173<br>C -2.925211 -3.098517 -0.310684<br>N -2.252765 0.372402 -0.124291<br>C -3.633509 0.317986 -0.009224<br>N -4.115100 -0.893796 -0.061999<br>C -2.179882 3.769813 -0.736947<br>C -1.501465 1.637802 -0.054174<br>C -1.803415 2.469855 1.209913<br>C -2.672838 3.626607 0.698091<br>O -1.888648 2.423234 -1.168267<br>H -4.212951 1.219343 0.106267<br>H -1.264876 4.368588 -0.786854<br>H -2.917204 4.177140 -1.427576<br>H -0.451383 1.385304 -0.109384                                                                                                                                                                                                                                                                                                                                                                                                                                                                                                                                                                                                                                                                                                                                                                                                                                                                                                                                                                                                                                   | <b>Eqn<sup>+</sup>-Q(H)-A<sup>+</sup>R<sup>+</sup> (TS)</b><br>N 0.409632 3.492550 -1.097219<br>C -0.175484 2.318643 -1.098182<br>N 0.331339 1.151942 -0.619075<br>C 1.631570 1.213889 -0.205006<br>C 2.313006 2.432489 -0.157842<br>C 1.664668 3.602992 -0.598702<br>N 2.521339 0.265722 0.243821<br>C 3.687800 0.966675 0.527886<br>N 3.597166 2.251076 0.311572<br>C 4.431279 -2.272238 -0.696075<br>C 2.497162 -1.208700 0.077562<br>C 3.120534 -1.961738 1.265734<br>C 4.039611 -2.990242 0.589813<br>O 3.238259 -1.553275 -1.083424<br>H 4.570427 0.458813 0.880419<br>H 4.690377 -2.933736 -1.521483<br>H 5.254520 -1.566571 -0.534517<br>H 1.465696 -1.482750 -0.086028                                                                                                                                                                                                                                                                                                                                                                                                                                                                                                                                                                                                                                                                                                                                                                                                                                                                                                                                                                                                     |

|                                                                                                                                                                                                                                                                                                                                                                                                                                                                                                                                                                                                                                                                                                                                                                                                                                                                                                                                                                                                                                                                                                                                                                                                                                                                                                                                                                                                                                                                                 |                                                                                                                                                                                                                                                                                                                                                                                                                                                                                                                                                                                                                                                                                                                                                                                                                                                                                                                                                                                                                                                                                                                                                                                                                                                                                                                                                                                                                |                                                                                                                                                                                                                                                                                                                                                                                                                                                                                                                                                                                                                                                                                                                                                                                                                                                                                                                                                                                                                                                                                                                                                                                                                                                                                                                                                                |
|---------------------------------------------------------------------------------------------------------------------------------------------------------------------------------------------------------------------------------------------------------------------------------------------------------------------------------------------------------------------------------------------------------------------------------------------------------------------------------------------------------------------------------------------------------------------------------------------------------------------------------------------------------------------------------------------------------------------------------------------------------------------------------------------------------------------------------------------------------------------------------------------------------------------------------------------------------------------------------------------------------------------------------------------------------------------------------------------------------------------------------------------------------------------------------------------------------------------------------------------------------------------------------------------------------------------------------------------------------------------------------------------------------------------------------------------------------------------------------|----------------------------------------------------------------------------------------------------------------------------------------------------------------------------------------------------------------------------------------------------------------------------------------------------------------------------------------------------------------------------------------------------------------------------------------------------------------------------------------------------------------------------------------------------------------------------------------------------------------------------------------------------------------------------------------------------------------------------------------------------------------------------------------------------------------------------------------------------------------------------------------------------------------------------------------------------------------------------------------------------------------------------------------------------------------------------------------------------------------------------------------------------------------------------------------------------------------------------------------------------------------------------------------------------------------------------------------------------------------------------------------------------------------|----------------------------------------------------------------------------------------------------------------------------------------------------------------------------------------------------------------------------------------------------------------------------------------------------------------------------------------------------------------------------------------------------------------------------------------------------------------------------------------------------------------------------------------------------------------------------------------------------------------------------------------------------------------------------------------------------------------------------------------------------------------------------------------------------------------------------------------------------------------------------------------------------------------------------------------------------------------------------------------------------------------------------------------------------------------------------------------------------------------------------------------------------------------------------------------------------------------------------------------------------------------------------------------------------------------------------------------------------------------|
| H -1.096406 2.722101 1.891389<br>H -2.385912 1.583514 2.274565<br>H -4.038833 2.996917 1.131586<br>H -2.943855 4.242662 1.736768<br>N -3.734164 -4.143974 -0.299758<br>H -4.679462 -3.832479 -0.139444<br>H -3.551450 -5.127356 -0.428587<br>C 1.442725 -1.289034 -1.819728<br>C 2.813686 -1.225917 -1.986521<br>C 0.738494 -0.771758 -0.642801<br>C 3.584937 -0.755179 -0.793267<br>O 3.434682 -1.524293 -3.079736<br>C 1.514421 -0.574718 0.575718<br>C 2.881566 -0.494039 0.462605<br>O 4.828724 -0.601762 -0.861276<br>C 0.822180 -0.447861 1.930295<br>C 3.769275 -0.101876 1.623179<br>C 1.666544 0.357559 2.944668<br>C 0.467645 -1.832296 2.518709<br>H -0.119407 0.090726 1.795839<br>C 3.089561 -0.207066 2.986067<br>H 4.122870 0.924418 1.458144<br>H 4.671255 -0.717438 1.600898<br>C 1.661090 1.859783 2.642644<br>H 1.210848 0.211312 3.930228<br>H 0.056650 -1.711857 3.524791<br>H 1.351114 -2.469836 2.584428<br>H -0.276601 -2.362545 1.926272<br>H 3.678529 0.324715 3.740205<br>H 3.057941 -1.255048 3.299130<br>H 0.679658 2.290004 2.853759<br>H 1.889559 2.067070 1.595966<br>H 2.390121 2.381414 3.270480<br>H 0.519278 -3.235893 -0.766655<br>H 0.831312 -1.534683 -2.684410<br>H 0.529437 0.469239 -1.257456<br>O 0.423918 1.397722 -2.101521<br>C 0.653139 2.616721 -1.725604<br>O 1.019515 2.942614 -0.590580<br>C 0.407566 3.657349 -2.802777<br>H -0.671334 3.751961 -2.951731<br>H 0.811907 4.624402 -2.506102<br>H 0.846866 3.342901 -3.751233 | H -0.855066 2.851181 1.588058<br>H -2.271845 1.877113 1.994007<br>H -3.734189 3.369200 0.716016<br>H -2.536634 4.538938 1.278685<br>N -3.995574 -3.889927 -0.274926<br>H -4.920619 -3.499327 -0.185013<br>H -3.883929 -4.890598 -0.332181<br>C 1.480461 -1.536142 -1.693634<br>C 2.862907 -1.573188 -1.758835<br>C 0.733903 -0.887531 -0.611032<br>C 3.585156 -1.035166 -0.559416<br>O 3.538809 -2.012309 -2.766768<br>C 1.445202 -0.624638 0.626555<br>C 2.813997 -0.588726 0.593930<br>O 4.838520 -0.981936 -0.540032<br>C 0.702808 -0.399460 1.931276<br>C 3.608598 -0.075716 1.769243<br>C 1.453207 0.518135 2.878201<br>C 0.439963 -1.753744 2.639895<br>H -0.273113 0.049813 1.731868<br>C 2.779812 0.627256 2.800151<br>H 4.391449 0.593681 1.395847<br>H 4.165130 -0.901402 2.237699<br>H -0.063397 -1.595684 3.596240<br>H 1.387873 -2.262282 2.827768<br>H -0.189527 -2.413480 2.041249<br>H 0.332195 -3.337801 -0.590719<br>H 0.914845 -1.817328 -2.578363<br>H 0.697056 0.335822 -1.272087<br>O 0.821583 1.274498 -2.114608<br>C 1.103809 2.470764 -1.704564<br>O 1.297525 2.784499 -0.523514<br>C 1.150871 3.512595 -2.808026<br>H 0.126048 3.735622 -3.118064<br>H 1.619941 4.429887 -2.453955<br>H 1.684358 3.130530 -3.679981<br>H 3.308359 1.249549 3.518292<br>C 0.639511 1.217917 3.931444<br>H -0.084288 1.904193 3.482052<br>H 0.062604 0.505485 4.530631<br>H 1.277496 1.790482 4.607568 | H 2.339550 -2.407370 1.876182<br>H 3.690502 -1.287455 1.905023<br>H 4.901533 -3.251741 1.204164<br>H 3.489072 -3.903839 0.355202<br>N 2.239721 4.804975 -0.561741<br>H 3.177187 4.915502 -0.208242<br>H 1.744819 5.610438 -0.912825<br>C -0.292719 -0.888691 -1.755694<br>C -1.227938 -1.639559 -2.450169<br>C -0.545855 -0.060908 -0.580230<br>C -2.649202 -1.399530 -2.071440<br>O -0.947277 -2.454627 -3.410556<br>C -1.948846 0.230161 -0.238096<br>C -2.949284 -0.469357 -0.961212<br>O -3.577542 -1.962130 -2.687021<br>C -2.327399 1.059735 0.857543<br>C -4.299529 -0.296633 -0.606066<br>C -3.682417 1.249053 1.150742<br>C -1.302320 1.745122 1.733997<br>C -4.659985 0.560720 0.409133<br>H -5.046867 -0.850721 -1.159314<br>C -4.126119 2.164416 2.266331<br>H -0.365921 1.195933 1.774186<br>H -1.667922 1.824313 2.757955<br>H -1.087538 2.765373 1.396862<br>H -5.706932 0.701433 0.656703<br>H -3.823135 1.784355 3.247706<br>H -5.212675 2.262643 2.270870<br>H -3.695704 3.164788 2.166651<br>H -1.181947 2.240643 -1.485531<br>H 0.738258 -0.961656 -2.092482<br>H -0.247491 -0.772315 0.659395<br>O 0.002632 -1.212784 1.757096<br>C -0.709285 -2.238764 2.134974<br>O -1.462272 -2.879278 1.401670<br>C -0.535726 -2.585708 3.602018<br>H -1.044857 -3.518082 3.841596<br>H 0.524831 -2.666674 3.849504<br>H -0.951708 -1.779384 4.212263 |
| <b>E'-Q(H)H<sup>+</sup>-GR' (TS)</b><br>C -1.683964 0.099035 -1.896302<br>C -2.871208 -0.425550 -2.251623<br>C -3.753944 -1.053287 -1.271732<br>C -3.323318 -1.098010 0.112139<br>C -2.136033 -0.532467 0.490436<br>C -1.322307 0.213096 -0.482052<br>O -3.332359 -0.432813 -3.533668<br>O -4.830889 -1.541396 -1.685827<br>C -4.200197 -1.901584 1.044408<br>C -3.726169 -1.939947 2.502875<br>C -2.198075 -1.879657 2.618336<br>C -1.680283 -0.598720 1.933317<br>C -2.109216 0.677258 2.685553<br>C -1.518469 -3.132690 2.053919<br>N 2.448988 2.264683 1.524053<br>C 3.586121 1.558504 1.231605<br>N 3.561766 0.444618 0.520977<br>C 2.336695 0.090686 0.113009<br>C 1.129055 0.745956 0.331716<br>C 1.125430 1.931700 1.145742<br>N 2.049397 -1.037903 -0.642391<br>C 0.726541 -1.048305 -0.878995<br>N 0.135562 0.000378 -0.312846<br>O 0.198234 2.618196 1.533797<br>N 4.755174 2.012015 1.716728<br>C 5.245009 -1.521863 -1.533167<br>C 3.001394 -2.053796 -1.158508                                                                                                                                                                                                                                                                                                                                                                                                                                                                                                    | <b>Eq'-Q(H)H<sup>+</sup>-GR' (TS)</b><br>C -1.713743 0.029853 -1.962090<br>C -2.905555 -0.482299 -2.321628<br>C -3.810738 -1.085662 -1.342915<br>C -3.378523 -1.127213 0.037558<br>C -2.191364 -0.571959 0.420020<br>C -1.356040 0.153588 -0.545906<br>O -3.356779 -0.490776 -3.606145<br>O -4.898505 -1.545404 -1.757305<br>C -4.240032 -1.877080 1.023504<br>C -3.436114 -2.426888 2.170167<br>C -2.282675 -1.879386 2.554798<br>C -1.795295 -0.610853 1.878776<br>C -2.377543 0.623565 2.613447<br>C -1.441458 -2.402033 3.682841<br>N 2.324508 2.136920 1.646726<br>C 3.483247 1.476213 1.331538<br>N 3.498731 0.408073 0.553723<br>C 2.289325 0.050300 0.103367<br>C 1.064520 0.662719 0.342032<br>C 1.016519 1.793627 1.227835<br>N 2.039195 -1.035586 -0.724541<br>C 0.719769 -1.062396 -0.980932<br>N 0.097269 -0.063215 -0.360601<br>O 0.062486 2.425600 1.642731<br>N 4.631826 1.926710 1.866173<br>C 5.256223 -1.383939 -1.601834<br>C 3.022631 -1.993707 -1.290007                                                                                                                                                                                                                                                                                                                                                                                                                                 | <b>Eqn'-Q(H)H<sup>+</sup>-GR' (TS)</b><br>C -1.486383 -1.171462 1.649045<br>C -2.614650 -0.946685 2.352002<br>C -3.466491 0.196553 2.076798<br>C -3.097429 1.066537 0.959352<br>C -1.965336 0.797216 0.151453<br>C -1.150654 -0.401372 0.460306<br>O -3.005237 -1.735308 3.395970<br>O -4.465209 0.381748 2.802752<br>C -3.921509 2.164670 0.673716<br>C -3.628487 2.994095 -0.386484<br>C -2.540795 2.720748 -1.232601<br>C -1.728565 1.602436 -0.993981<br>C -0.643085 1.282920 -1.996490<br>C -2.283417 3.629365 -2.407647<br>N 2.598722 -2.993030 -0.305984<br>C 3.742135 -2.234161 -0.338502<br>N 3.738265 -0.930214 -0.112048<br>C 2.519057 -0.424903 0.111285<br>C 1.305012 -1.101178 0.118450<br>C 1.291749 -2.526839 -0.033810<br>N 2.233052 0.900286 0.400944<br>C 0.899281 1.006818 0.590220<br>N 0.307218 -0.167094 0.405540<br>O 0.362313 -3.311754 0.060832<br>N 4.899086 -2.852302 -0.626990<br>C 5.426086 1.677843 1.067124<br>C 3.185123 2.032326 0.509892                                                                                                                                                                                                                                                                                                                                                                                    |

|                                                                                                                                                                                                                                                                                                                                                                                                                                                                                                                                                                                                                                                                                                                                                                                                                                                                                                                                                                                                                                                                                                                                                                                                                                                               |                                                                                                                                                                                                                                                                                                                                                                                                                                                                                                                                                                                                                                                                                                                                                                                                                                                                                                                                                                                                                                                                                                                                                                                                                                             |                                                                                                                                                                                                                                                                                                                                                                                                                                                                                                                                                                                                                                                                                                                                                                                                                                                                                                                                                                                                                                                                                                                                                                                                                                                  |
|---------------------------------------------------------------------------------------------------------------------------------------------------------------------------------------------------------------------------------------------------------------------------------------------------------------------------------------------------------------------------------------------------------------------------------------------------------------------------------------------------------------------------------------------------------------------------------------------------------------------------------------------------------------------------------------------------------------------------------------------------------------------------------------------------------------------------------------------------------------------------------------------------------------------------------------------------------------------------------------------------------------------------------------------------------------------------------------------------------------------------------------------------------------------------------------------------------------------------------------------------------------|---------------------------------------------------------------------------------------------------------------------------------------------------------------------------------------------------------------------------------------------------------------------------------------------------------------------------------------------------------------------------------------------------------------------------------------------------------------------------------------------------------------------------------------------------------------------------------------------------------------------------------------------------------------------------------------------------------------------------------------------------------------------------------------------------------------------------------------------------------------------------------------------------------------------------------------------------------------------------------------------------------------------------------------------------------------------------------------------------------------------------------------------------------------------------------------------------------------------------------------------|--------------------------------------------------------------------------------------------------------------------------------------------------------------------------------------------------------------------------------------------------------------------------------------------------------------------------------------------------------------------------------------------------------------------------------------------------------------------------------------------------------------------------------------------------------------------------------------------------------------------------------------------------------------------------------------------------------------------------------------------------------------------------------------------------------------------------------------------------------------------------------------------------------------------------------------------------------------------------------------------------------------------------------------------------------------------------------------------------------------------------------------------------------------------------------------------------------------------------------------------------|
| C 3.825410 -2.720749 -0.041996<br>C 5.241952 -2.753882 -0.635134<br>O 3.895409 -1.455545 -2.063667<br>H -1.032108 0.565194 -2.625065<br>H -1.614171 1.483995 -0.331470<br>H -4.250713 -2.918154 0.637153<br>H -5.226328 -1.526151 0.989823<br>H -4.101824 -2.847576 2.983933<br>H -4.158399 -1.100760 3.052633<br>H -1.937532 -1.804025 3.679712<br>H -0.586871 -0.635705 1.953207<br>H -1.772482 0.624435 3.725226<br>H -3.195054 0.789597 2.681509<br>H -1.671018 1.560744 2.225589<br>H -0.432967 -3.072582 2.175542<br>H -1.724931 -3.258070 0.987674<br>H -1.867990 -4.030562 2.571185<br>H 2.510786 3.093061 2.104584<br>H 0.209281 -1.797854 -1.452809<br>H 5.597386 1.548739 1.413364<br>H 4.842203 2.929075 2.124372<br>H 5.917054 -1.592015 -2.387134<br>H 5.448543 -0.609661 -0.968374<br>H 2.374306 -2.763219 -1.699014<br>H 3.430270 -3.707511 0.194408<br>H 3.797896 -2.111364 0.859893<br>H 6.015171 -2.710484 0.132334<br>H 5.392406 -3.657556 -1.229878<br>C -1.235309 3.484809 -1.012868<br>O -0.224847 3.072198 -1.603129<br>O -2.065358 2.735822 -0.368262<br>C -1.562924 4.970306 -0.987258<br>H -1.281208 5.371960 -0.009056<br>H -1.007360 5.504724 -1.757633<br>H -2.634221 5.135607 -1.114755<br>H -4.195005 -0.887172 -3.477066     | C 3.850581 -2.707861 -0.206107<br>C 5.274298 -2.668893 -0.781493<br>O 3.911431 -1.317932 -2.144444<br>H -1.053381 0.481542 -2.692719<br>H -1.624245 1.419741 -0.402296<br>H -4.755944 -2.682561 0.495252<br>H -5.041871 -1.223036 1.397418<br>H -3.827194 -3.300420 2.683667<br>H -0.706376 -0.566305 1.961978<br>H -2.078545 0.608118 3.664583<br>H -3.468559 0.603519 2.565907<br>H -2.011024 1.544069 2.163368<br>H -0.447672 -2.690959 3.322502<br>H -1.902203 -3.270078 4.158172<br>H -1.286091 -1.633221 4.447789<br>H 2.357545 2.926497 2.281169<br>H 0.229345 -1.786984 -1.607945<br>H 5.490895 1.505996 1.548327<br>H 4.687354 2.820528 2.327427<br>H 5.939382 -1.384675 -2.449846<br>H 5.430523 -0.503618 -0.979559<br>H 2.420299 -2.683010 -1.882132<br>H 3.478289 -3.716902 -0.036031<br>H 3.797145 -2.156123 0.731075<br>H 6.037166 -2.653784 -0.002682<br>H 5.454879 -3.529993 -1.428675<br>C -1.144241 3.430181 -1.015986<br>O -0.103587 2.995853 -1.535497<br>O -2.040268 2.696990 -0.448197<br>C -1.427648 4.924911 -0.988557<br>H -2.485402 5.125253 -1.167401<br>H -1.182849 5.306082 0.007717<br>H -0.817122 5.450978 -1.722258<br>H -4.230134 -0.924342 -3.554874                                                      | C 4.017670 2.236690 -0.769112<br>C 5.429283 2.493097 -0.221032<br>O 4.074076 1.811039 1.577704<br>H -0.827821 -1.986329 1.925372<br>H -1.458162 -1.198012 -0.611903<br>H -4.785220 2.340630 1.301968<br>H -4.254384 3.855176 -0.592193<br>H 0.238603 1.921006 -1.867081<br>H -1.007457 1.459081 -3.009738<br>H -0.326424 0.245344 -1.949126<br>H -1.247189 3.977492 -2.428144<br>H -2.936423 4.501876 -2.369787<br>H -2.465082 3.116229 -3.357623<br>H 2.660493 -3.994497 -0.446924<br>H 0.385092 1.921601 0.826520<br>H 5.748935 -2.314902 -0.557732<br>H 4.974849 -3.855552 -0.677247<br>H 6.094548 2.056797 1.838744<br>H 5.631291 0.621826 0.878033<br>H 2.559315 2.893504 0.745140<br>H 3.623766 3.061502 -1.360875<br>H 3.998024 1.333741 -1.377589<br>H 6.208783 2.173954 -0.913351<br>H 5.573166 3.552910 0.000616<br>C -2.977489 -1.937392 -1.920145<br>O -3.863601 -1.680141 -1.098419<br>O -1.705464 -1.797798 -1.702925<br>C -3.315045 -2.445174 -3.312787<br>H -2.730895 -3.338799 -3.542523<br>H -4.378343 -2.665823 -3.397865<br>H -3.046148 -1.681392 -4.047839<br>H -3.819116 -1.316032 3.731292                                                                                                                                |
| <b>E<sup>+</sup>-Q(H)H<sup>+</sup>-AR<sup>+</sup> (TS)</b><br>N -1.697769 -3.602845 0.255635<br>C -0.679989 -2.788716 0.215887<br>N -0.697549 -1.447526 -0.052596<br>C -1.947884 -0.908171 -0.228395<br>C -3.075548 -1.738573 -0.263682<br>C -2.936463 -3.118620 -0.023861<br>N -2.425224 0.366966 -0.409381<br>C -3.797071 0.230146 -0.579921<br>N -4.214907 -1.004556 -0.502255<br>C -3.040663 3.692815 -0.314866<br>C -1.816115 1.697170 -0.108499<br>C -2.182229 2.190048 1.304490<br>C -3.371472 3.126854 1.061135<br>O -2.360974 2.621455 -1.019947<br>H -4.413612 1.092414 -0.767844<br>H -2.363349 4.548976 -0.245547<br>H -3.911902 3.969639 -0.907662<br>H -0.752238 1.599557 -0.281795<br>H -1.337199 2.751976 1.704062<br>H -2.398123 1.369378 1.987022<br>H -4.314635 2.577431 1.043926<br>H -3.449201 3.904342 1.820687<br>N -3.962697 -3.961756 -0.042995<br>H -4.894626 -3.631846 -0.242955<br>H -3.815614 -4.939912 0.155773<br>C 1.303827 -1.652724 -1.402339<br>C 2.647322 -1.713048 -1.441357<br>C 0.641541 -0.855253 -0.366023<br>C 3.466536 -1.128151 -0.383853<br>O 3.342571 -2.299479 -2.454038<br>C 1.432690 -0.458140 0.800704<br>C 2.797850 -0.522167 0.749548<br>O 4.710870 -1.198637 -0.506674<br>H 4.279045 -2.166900 -2.208931 | <b>Eq<sup>+</sup>-Q(H)H<sup>+</sup>-AR<sup>+</sup> (TS)</b><br>N 1.624831 3.693251 -0.399893<br>C 0.593634 2.897666 -0.448855<br>N 0.598872 1.529320 -0.428769<br>C 1.838798 0.956206 -0.295791<br>C 2.988165 1.755997 -0.249952<br>C 2.870051 3.156536 -0.313200<br>N 2.287760 -0.333431 -0.167275<br>C 3.669336 -0.244736 -0.076049<br>N 4.117816 0.979770 -0.120616<br>C 2.299600 -3.732842 -0.772014<br>C 1.571001 -1.620485 -0.085110<br>C 1.912724 -2.440038 1.176987<br>C 2.809523 -3.570998 0.654932<br>O 1.963642 -2.395309 -1.201845<br>H 4.273012 -1.132557 0.017127<br>H 1.400833 -4.356599 -0.807240<br>H 3.037649 -4.120236 -1.473043<br>H 0.512682 -1.402183 -0.125888<br>H 0.980065 -2.849245 1.564965<br>H 2.371942 -1.832650 1.955319<br>H 3.862680 -3.281462 0.656282<br>H 2.709675 -4.485212 1.239761<br>N 3.917018 3.973284 -0.282389<br>H 4.854013 3.605835 -0.217024<br>H 3.778543 4.971915 -0.320610<br>C -1.486566 1.483146 -1.683741<br>C -2.832129 1.455597 -1.663068<br>C -0.725113 0.863889 -0.590797<br>C -3.568250 0.943264 -0.508733<br>O -3.602155 1.867568 -2.705090<br>C -1.444054 0.597326 0.660114<br>C -2.807699 0.529399 0.651961<br>O -4.816903 0.912305 -0.576465<br>C -0.683859 0.371640 1.951948 | <b>Eqn<sup>+</sup>-Q(H)H<sup>+</sup>-AR<sup>+</sup> (TS)</b><br>N 0.637835 3.322103 -1.330237<br>C -0.014935 2.190863 -1.257362<br>N 0.404641 1.045166 -0.652959<br>C 1.686087 1.076330 -0.174825<br>C 2.425628 2.259113 -0.183448<br>C 1.868230 3.416418 -0.765122<br>N 2.497951 0.120926 0.389766<br>C 3.678823 0.789407 0.698634<br>N 3.666193 2.056420 0.381483<br>C 4.261543 -1.971330 -0.953629<br>C 2.396803 -1.365534 0.270205<br>C 3.289953 -2.093613 1.279121<br>C 4.565132 -2.454326 0.475725<br>O 2.829941 -1.769608 -1.004109<br>H 4.505376 0.275915 1.160919<br>H 4.505199 -2.696021 -1.728060<br>H 4.766785 -1.028173 -1.183661<br>H 1.355386 -1.620178 0.375557<br>H 2.762260 -2.992726 1.593889<br>H 3.481226 -1.503416 2.173464<br>H 5.456604 -1.968950 0.874615<br>H 4.737701 -3.529657 0.496559<br>N 2.501866 4.584694 -0.799095<br>H 3.420283 4.683399 -0.394512<br>H 2.070587 5.379279 -1.246834<br>C -0.348176 -1.054974 -1.576244<br>C -1.367361 -1.753965 -2.115457<br>C -0.553963 -0.088291 -0.507234<br>C -2.750274 -1.446129 -1.799105<br>O -1.178434 -2.749306 -3.029005<br>C -1.947011 0.329509 -0.208941<br>C -3.004203 -0.365892 -0.845973<br>O -3.649217 -2.101428 -2.365067<br>H -2.077853 -3.043624 -3.264061 |

|                                                                                                                                                                                                                                                                                                                                                                                                                                                                                                                                                                                                                                                                                                                                                                                                                                                                                                                                                                                                                                                                                                                                                                                                                                                                                                                                                                                                                                                             |                                                                                                                                                                                                                                                                                                                                                                                                                                                                                                                                                                                                                                                                                                                                                                                                                                                                                                                                                                                                                                                                                                                                                                                                                                                                                                                                                                                                                                                                                                 |                                                                                                                                                                                                                                                                                                                                                                                                                                                                                                                                                                                                                                                                                                                                                                                                                                                                                                                                                                                                                                                                                                                                                                                                                                                                                                                                                                                                                                                                                                       |
|-------------------------------------------------------------------------------------------------------------------------------------------------------------------------------------------------------------------------------------------------------------------------------------------------------------------------------------------------------------------------------------------------------------------------------------------------------------------------------------------------------------------------------------------------------------------------------------------------------------------------------------------------------------------------------------------------------------------------------------------------------------------------------------------------------------------------------------------------------------------------------------------------------------------------------------------------------------------------------------------------------------------------------------------------------------------------------------------------------------------------------------------------------------------------------------------------------------------------------------------------------------------------------------------------------------------------------------------------------------------------------------------------------------------------------------------------------------|-------------------------------------------------------------------------------------------------------------------------------------------------------------------------------------------------------------------------------------------------------------------------------------------------------------------------------------------------------------------------------------------------------------------------------------------------------------------------------------------------------------------------------------------------------------------------------------------------------------------------------------------------------------------------------------------------------------------------------------------------------------------------------------------------------------------------------------------------------------------------------------------------------------------------------------------------------------------------------------------------------------------------------------------------------------------------------------------------------------------------------------------------------------------------------------------------------------------------------------------------------------------------------------------------------------------------------------------------------------------------------------------------------------------------------------------------------------------------------------------------|-------------------------------------------------------------------------------------------------------------------------------------------------------------------------------------------------------------------------------------------------------------------------------------------------------------------------------------------------------------------------------------------------------------------------------------------------------------------------------------------------------------------------------------------------------------------------------------------------------------------------------------------------------------------------------------------------------------------------------------------------------------------------------------------------------------------------------------------------------------------------------------------------------------------------------------------------------------------------------------------------------------------------------------------------------------------------------------------------------------------------------------------------------------------------------------------------------------------------------------------------------------------------------------------------------------------------------------------------------------------------------------------------------------------------------------------------------------------------------------------------------|
| C 0.729976 0.141546 2.004251<br>C 3.700348 0.086090 1.794551<br>C 1.610079 1.221684 2.670609<br>C 0.294473 -0.941316 3.012477<br>H -0.178593 0.631039 1.654524<br>C 2.968976 0.611165 3.033424<br>H 4.254075 0.898698 1.308878<br>H 4.462125 -0.643332 2.082781<br>C 1.762938 2.458962 1.776934<br>H 1.108001 1.524995 3.595551<br>H -0.124924 -0.467793 3.904083<br>H 1.136662 -1.564137 3.317836<br>H -0.470771 -1.598202 2.598131<br>H 3.590379 1.356339 3.538191<br>H 2.820724 -0.202593 3.747896<br>H 0.799664 2.949179 1.615441<br>H 2.171649 2.202394 0.796826<br>H 2.429108 3.189599 2.244685<br>H 0.310465 -3.188601 0.389457<br>H 0.699727 -2.065931 2.202150<br>H 0.539663 0.246205 -1.111602<br>O 0.457618 1.217278 -1.988085<br>C 1.547228 1.886993 -2.215653<br>O 2.640050 1.660229 -1.689218<br>C 1.370129 3.026713 -3.207109<br>H 0.914905 2.657225 -4.128705<br>H 0.689719 3.770490 -2.783523<br>H 2.325929 3.498781 -3.430901                                                                                                                                                                                                                                                                                                                                                                                                                                                                                                             | C -3.590393 0.041130 1.841001<br>C -1.415555 -0.561193 2.900737<br>C -0.431991 1.726165 2.664627<br>H 0.293399 -0.064562 1.733456<br>C -2.742895 -0.671115 2.850742<br>H -4.390252 -0.616160 1.484086<br>H -4.116512 0.883673 2.312826<br>H 0.078353 1.561629 3.615305<br>H -1.383118 2.223475 2.863606<br>H 0.188921 2.396425 2.069484<br>H -0.394094 3.333391 -0.520472<br>H -0.949133 1.809924 -2.566226<br>H -0.650955 -0.297012 -1.197412<br>O -0.800059 -1.299839 -2.082632<br>C -1.077493 -2.487552 -1.658720<br>O -1.222718 -2.792473 -0.465291<br>C -1.182623 -3.542586 -2.747001<br>H -0.172948 -3.789642 -3.087722<br>H -1.656566 -4.446773 -2.366386<br>H -1.737064 -3.160913 -3.605959<br>H -3.258418 -1.300701 3.570337<br>C -0.575486 -1.274970 3.922210<br>H 0.127991 -1.962063 3.443115<br>H 0.024568 -0.571818 4.508979<br>H -1.196969 -1.848983 4.611678<br>H -4.519207 1.710454 -2.408535                                                                                                                                                                                                                                                                                                                                                                                                                                                                                                                                                                                   | C -2.257386 1.294142 0.786956<br>C -4.337513 -0.043203 -0.551565<br>C -3.596297 1.632002 1.027755<br>C -1.186049 1.961067 1.619243<br>C -4.625844 0.959037 0.347157<br>H -5.124474 -0.596578 -1.047609<br>C -3.964230 2.696593 2.030663<br>H -0.305150 1.334798 1.729873<br>H -1.558431 2.161619 2.623565<br>H -0.876571 2.924481 1.200578<br>H -5.656616 1.223008 0.555137<br>H -3.719440 2.386942 3.051889<br>H -5.034100 2.904305 1.993840<br>H -3.427940 3.630479 1.843144<br>H -1.007059 2.135134 -1.683980<br>H 0.666462 -1.249477 -1.905982<br>H -0.325732 -0.701307 0.718057<br>O -0.153582 -1.140840 1.882518<br>C -0.876222 -2.194590 2.143504<br>O -1.600154 -2.761575 1.323418<br>C -0.748960 -2.682680 3.574482<br>H 0.298294 -2.900244 3.797667<br>H -1.071849 -1.896000 4.260864<br>H -1.351442 -3.575824 3.733105                                                                                                                                                                                                                                                                                                                                                                                                                                                                                                                                                                                                                                                                     |
| <b>E'-Q<sup>2</sup>-G<sup>+</sup>R'</b><br><br>C 0.707437 0.702887 2.211730<br>C 1.477479 1.317426 1.024883<br>H 0.346390 1.482496 2.888696<br>H 1.368843 0.040814 2.778079<br>H -0.157936 0.119716 1.897432<br>C 2.068503 0.227758 0.122937<br>C 2.517950 2.325276 1.575708<br>H 0.763291 1.910344 0.441016<br>C 3.729023 2.451701 0.657169<br>C 3.462681 0.051451 -0.033734<br>H 2.889104 1.924574 2.529497<br>C 1.255578 -0.705893 -0.523017<br>C 1.870587 3.685419 1.851780<br>C 4.412558 1.098097 0.501008<br>H 3.407314 2.820845 -0.326033<br>C 1.767618 -1.793604 -1.247583<br>H 4.425252 3.193406 1.065109<br>C 4.044463 -1.047508 -0.740771<br>N -0.181383 -0.551857 -0.517575<br>H 1.543709 4.149018 0.914614<br>H 2.579398 4.365714 2.333167<br>H 0.996545 3.599374 2.503009<br>C 3.147259 -2.038234 -1.369828<br>H 4.836392 0.798340 1.472703<br>H 5.266770 1.162241 -0.178040<br>H 1.074258 -2.476894 -1.730091<br>O 5.330264 -1.171884 -0.841475<br>C -0.820530 0.477395 -1.070071<br>C -1.146450 -1.407413 0.021702<br>O 3.617264 -3.062241 -2.022382<br>N -2.153140 0.352054 -0.886014<br>H -0.350565 1.280608 -1.605780<br>C -1.066590 -2.598883 0.811814<br>C -2.388541 -0.831610 -0.217489<br>N -3.598552 -1.288377 0.137761<br>O -0.091162 -3.216701 1.209937<br>N -2.371552 -3.041306 1.144196<br>C -3.552770 -2.422468 0.817334<br>H -2.392101 -3.891402 1.695216<br>N -4.697928 -3.019585 1.193705<br>H -4.707163 -3.801036 1.829139 | <b>Eq'-Q<sup>2</sup>-G<sup>+</sup>R'</b><br><br>C 1.065708 0.528061 2.426189<br>C 1.395632 1.271406 1.107907<br>H 0.608213 1.199227 3.158795<br>H 1.980225 0.115633 2.859840<br>H 0.372426 -0.296384 2.246211<br>C 2.046143 0.332145 0.106188<br>C 2.254459 2.482954 1.404259<br>H 0.445165 1.638799 0.707372<br>C 3.582324 2.415528 1.286090<br>C 3.450233 0.228632 0.024952<br>C 1.303554 -0.543815 -0.678627<br>C 1.533281 3.716589 1.873705<br>C 4.312007 1.194085 0.805865<br>C 1.897808 -1.500196 -1.515859<br>H 4.185139 3.282895 1.548702<br>C 4.118242 -0.734994 -0.787790<br>N -0.141634 -0.500733 -0.630362<br>H 0.841407 4.078285 1.103648<br>H 2.230282 4.522365 2.114530<br>H 0.928000 3.512473 2.763978<br>C 3.295495 -1.647259 -1.613734<br>H 4.780969 0.687912 1.666748<br>H 5.162738 1.490540 0.182328<br>H 1.262678 -2.151475 -2.109949<br>O 5.411594 -0.810839 -0.814730<br>C -0.875928 0.469743 -1.169408<br>C -1.014519 -1.397682 -0.011650<br>O 3.845414 -2.529210 -2.395515<br>N -2.184501 0.262916 -0.909059<br>H -0.485727 1.294883 -1.736135<br>C -0.810535 -2.580853 0.768240<br>C -2.302926 -0.912222 -0.193043<br>N -3.457066 -1.439263 0.241606<br>O 0.226222 -3.139528 1.092505<br>N -2.060915 -3.097451 1.188578<br>C -3.296608 -2.554773 0.934662<br>H -1.995156 -3.946738 1.737413<br>N -4.375664 -3.211562 1.397480<br>H -4.294162 -3.969587 2.055834<br>H -5.271061 -2.756643 1.312544<br>C -3.307861 1.159249 -1.306523<br>C -3.979886 1.804589 -0.075947 | <b>Eqn'-Q<sup>2</sup>-G<sup>+</sup>R'</b><br><br>C 0.334360 1.411197 1.677363<br>C 1.743433 1.345482 1.127305<br>H 0.321703 1.916101 2.642079<br>H -0.088938 0.419458 1.833610<br>H -0.353145 1.964429 1.027164<br>C 2.150800 0.315711 0.198334<br>C 2.667197 2.275604 1.584799<br>C 4.030320 2.169512 1.199453<br>C 3.561450 0.167499 -0.107354<br>C 1.313387 -0.631197 -0.429964<br>C 2.279182 3.401498 2.518988<br>C 4.458786 1.132407 0.411664<br>C 1.817248 -1.672027 -1.217235<br>H 4.738533 2.905922 1.566440<br>C 4.111550 -0.905661 -0.918121<br>N -0.123741 -0.505594 -0.425733<br>H 1.420974 3.970104 2.149801<br>H 3.112364 4.096951 2.637362<br>H 2.014763 3.037560 3.518365<br>C 3.186183 -1.894526 -1.473320<br>H 5.506036 1.022313 0.157775<br>H 1.105223 -2.347429 -1.684321<br>O 5.373714 -0.981792 -1.143601<br>C -0.786383 0.483704 -1.023761<br>C -1.067458 -1.373247 0.128216<br>O 3.601414 -2.890780 -2.198675<br>N -2.117452 0.318796 -0.855102<br>H -0.331309 1.286579 -1.573274<br>C -0.956425 -2.535420 0.955469<br>C -2.323627 -0.846347 -0.144901<br>N -3.521515 -1.328622 0.216599<br>O 0.037044 -3.111086 1.373572<br>N -2.249230 -3.004806 1.297226<br>C -3.446000 -2.433681 0.940607<br>H -2.248830 -3.836083 1.876655<br>N -4.575796 -3.049376 1.333740<br>H -4.565779 -3.796863 2.009026<br>H -5.447851 -2.568726 1.177315<br>C -3.183877 1.240039 -1.333915<br>C -3.868091 1.981497 -0.168345<br>H -3.870802 0.624976 -1.915055<br>C -3.908300 3.434134 -0.665453 |



|                                                                                                                                                                                                                                                                                                                                                                                                                                                                                                                                                                                                                                                                                                                                                                                                                                                                                                                                                                                                                                                                                                                                                                                                                                                                                                                                                                                                                                                                                                                                                                                                                                                                                                                                                                                                                                                                                                 |                                                                                                                                                                                                                                                                                                                                                                                                                                                                                                                                                                                                                                                                                                                                                                                                                                                                                                                                                                                                                                                                                                                                                                                                                                                                                                                                                                                                                                                                                                                                                                                                                                                                                                                                                                                                                      |                                                                                                                                                                                                                                                                                                                                                                                                                                                                                                                                                                                                                                                                                                                                                                                                                                                                                                                                                                                                                                                                                                                                                                                                                                                                                                                                                                                                                                                                                                                                                                                                                                                                                                                                                    |
|-------------------------------------------------------------------------------------------------------------------------------------------------------------------------------------------------------------------------------------------------------------------------------------------------------------------------------------------------------------------------------------------------------------------------------------------------------------------------------------------------------------------------------------------------------------------------------------------------------------------------------------------------------------------------------------------------------------------------------------------------------------------------------------------------------------------------------------------------------------------------------------------------------------------------------------------------------------------------------------------------------------------------------------------------------------------------------------------------------------------------------------------------------------------------------------------------------------------------------------------------------------------------------------------------------------------------------------------------------------------------------------------------------------------------------------------------------------------------------------------------------------------------------------------------------------------------------------------------------------------------------------------------------------------------------------------------------------------------------------------------------------------------------------------------------------------------------------------------------------------------------------------------|----------------------------------------------------------------------------------------------------------------------------------------------------------------------------------------------------------------------------------------------------------------------------------------------------------------------------------------------------------------------------------------------------------------------------------------------------------------------------------------------------------------------------------------------------------------------------------------------------------------------------------------------------------------------------------------------------------------------------------------------------------------------------------------------------------------------------------------------------------------------------------------------------------------------------------------------------------------------------------------------------------------------------------------------------------------------------------------------------------------------------------------------------------------------------------------------------------------------------------------------------------------------------------------------------------------------------------------------------------------------------------------------------------------------------------------------------------------------------------------------------------------------------------------------------------------------------------------------------------------------------------------------------------------------------------------------------------------------------------------------------------------------------------------------------------------------|----------------------------------------------------------------------------------------------------------------------------------------------------------------------------------------------------------------------------------------------------------------------------------------------------------------------------------------------------------------------------------------------------------------------------------------------------------------------------------------------------------------------------------------------------------------------------------------------------------------------------------------------------------------------------------------------------------------------------------------------------------------------------------------------------------------------------------------------------------------------------------------------------------------------------------------------------------------------------------------------------------------------------------------------------------------------------------------------------------------------------------------------------------------------------------------------------------------------------------------------------------------------------------------------------------------------------------------------------------------------------------------------------------------------------------------------------------------------------------------------------------------------------------------------------------------------------------------------------------------------------------------------------------------------------------------------------------------------------------------------------|
| H -5.557888 -2.512022 1.057259<br>C -3.190835 1.333155 -1.309745<br>C -3.851981 2.018658 -0.095197<br>H -3.893192 0.779844 -1.932169<br>C -3.772976 3.510921 -0.455112<br>H -3.275636 1.804450 0.806017<br>H -4.868472 1.661283 0.056661<br>C -2.524068 3.563045 -1.323045<br>H -4.646223 3.818015 -1.034233<br>H -3.697555 4.148289 0.425933<br>H -2.505201 4.375360 -2.046892<br>H -1.609382 3.591207 -0.721595<br>O -2.568421 2.325009 -2.081838                                                                                                                                                                                                                                                                                                                                                                                                                                                                                                                                                                                                                                                                                                                                                                                                                                                                                                                                                                                                                                                                                                                                                                                                                                                                                                                                                                                                                                             | H -3.985104 0.548957 -1.902976<br>C -4.012764 3.297043 -0.442761<br>H -3.366994 1.634679 0.810326<br>H -4.965231 1.379926 0.104884<br>C -2.798419 3.428212 -1.350092<br>H -4.922472 3.541823 -0.994820<br>H -3.952664 3.942387 0.433606<br>H -2.855360 4.237229 -2.075537<br>H -1.868858 3.517379 -0.777877<br>O -2.786808 2.187004 -2.105124                                                                                                                                                                                                                                                                                                                                                                                                                                                                                                                                                                                                                                                                                                                                                                                                                                                                                                                                                                                                                                                                                                                                                                                                                                                                                                                                                                                                                                                                        | H -3.257213 1.895654 0.731801<br>H -4.850479 1.564870 0.044851<br>C -2.661621 3.504579 -1.535691<br>H -4.800338 3.613801 -1.269188<br>H -3.889451 4.155136 0.151845<br>H -2.706020 4.242273 -2.334620<br>H -1.757111 3.668099 -0.940849<br>O -2.593534 2.199602 -2.171136                                                                                                                                                                                                                                                                                                                                                                                                                                                                                                                                                                                                                                                                                                                                                                                                                                                                                                                                                                                                                                                                                                                                                                                                                                                                                                                                                                                                                                                                          |
| <b>E'-Q<sup>2</sup>-A<sup>+</sup>R'</b><br>N 2.585965 -2.600293 1.359531<br>C 1.362615 -2.145948 1.481991<br>N 0.866668 -1.009824 0.927566<br>C 1.759650 -0.274647 0.206478<br>C 3.065423 -0.710935 -0.005955<br>C 3.478200 -1.918377 0.594612<br>N 1.633222 0.918078 -0.455013<br>C 2.876327 1.140910 -1.036199<br>N 3.746625 0.193633 -0.795740<br>C 1.596738 3.829371 0.405179<br>C 0.530258 1.917494 -0.331154<br>C 0.478301 2.867033 -1.532774<br>C 1.264440 4.118834 -1.069857<br>O 0.743098 2.730692 0.795670<br>H 3.066803 2.018114 -1.632556<br>H 1.376568 4.655446 1.078952<br>H 2.644033 3.539180 0.538021<br>H -0.376196 1.345714 -0.169469<br>H -0.566940 3.113245 -1.713303<br>H 0.865425 2.413579 -2.443300<br>H 2.171439 4.277103 -1.654545<br>H 0.650800 5.013785 -1.166202<br>N 4.705062 -2.415931 0.449989<br>H 5.392594 -1.936331 -0.109974<br>H 4.955786 -3.278135 0.909341<br>C -0.943908 -0.025331 2.238688<br>C -2.261627 0.437660 2.427469<br>C -0.542741 -0.662209 1.055542<br>C -3.193765 0.247347 1.296516<br>O -2.639085 1.026432 3.523461<br>C -1.399351 -0.890480 -0.017813<br>C -2.727028 -0.424837 0.124011<br>O -4.409106 0.688065 1.371130<br>C -0.933102 -1.639396 -1.260626<br>C -3.722441 -0.557303 -1.008943<br>C -1.793204 -1.289493 -2.491842<br>C -0.895337 -3.162065 -1.022909<br>H 0.092589 -1.334837 -1.499382<br>C -3.276596 -1.475053 -2.151055<br>H -3.935616 0.445064 -1.406907<br>H -4.681531 -0.899550 -0.607629<br>C -1.495329 0.122551 -3.006689<br>H -1.528599 -1.996525 -3.287216<br>H -0.576977 -3.687783 -1.929170<br>H -1.877867 -3.541402 -0.733448<br>H -0.197964 -3.424062 -0.224936<br>H -3.889708 -1.288138 -3.039491<br>H -3.449506 -2.519435 -1.872974<br>H -0.440433 0.223256 -3.277912<br>H -1.719486 0.876693 -2.249362<br>H -2.094980 0.350958 -3.892905<br>H 0.644201 -2.704808 2.067569<br>H -0.211617 0.146971 3.022345 | <b>Eq'-Q<sup>2</sup>-A<sup>+</sup>R'</b><br>N -3.190773 -2.307408 -0.673305<br>C -1.899996 -2.185551 -0.867017<br>N -1.170084 -1.051072 -0.718781<br>C -1.876277 0.056228 -0.354479<br>C -3.249353 0.007165 -0.114942<br>C -3.914444 -1.224631 -0.283372<br>N -1.492003 1.347535 -0.137335<br>C -2.648976 2.020462 0.225908<br>N -3.712291 1.255373 0.248363<br>C 0.200163 4.297644 -0.082604<br>C -0.155950 1.982969 -0.262561<br>C 0.503336 2.263031 1.094034<br>C 1.188659 3.611817 0.853398<br>O -0.329727 3.233198 -0.911783<br>H -2.629635 3.076373 0.440703<br>H 0.648795 5.033798 -0.748568<br>H -0.619806 4.768240 0.471141<br>H 0.436489 1.324366 -0.892323<br>H 1.186175 1.464135 1.374230<br>H -0.263203 2.352596 1.867449<br>H 1.352545 4.173396 1.773479<br>H 2.150792 3.472327 0.354488<br>N -5.222284 -1.373831 -0.079891<br>H -5.791455 -0.592220 0.205445<br>H -5.654034 -2.274611 -0.219168<br>C 0.692981 -0.786261 -2.275424<br>C 2.055229 -0.616955 -2.600947<br>C 0.265857 -1.024668 -0.958120<br>C 3.017029 -0.667465 -1.474346<br>O 2.455346 -0.416460 -3.818604<br>C 1.140723 -1.084705 0.117878<br>C 2.509267 -0.893469 -0.160321<br>O 4.282846 -0.505050 -1.687606<br>C 0.659623 -1.381053 1.527243<br>C 3.501867 -0.878824 0.978490<br>C 1.586144 -0.818619 2.585790<br>C 0.488935 -2.903969 1.750210<br>H -0.326554 -0.924973 1.678689<br>C 2.880877 -0.630752 2.322699<br>H 4.257828 -0.113888 0.771647<br>H 4.078169 -1.819198 1.006955<br>C 0.971721 -0.525051 3.926083<br>H 0.167652 -3.123425 2.772247<br>H 1.438404 -3.413966 1.569833<br>H -0.255150 -3.321491 1.068461<br>H 3.535667 -0.267151 3.112171<br>H 0.202607 0.251213 3.834963<br>H 1.720230 -0.183189 4.644146<br>H 0.475541 -1.407693 4.344101<br>H -1.324684 -3.048458 -1.176481<br>H -0.046535 -0.717910 -3.068625 | <b>Eqn'-Q<sup>2</sup>-A<sup>+</sup>R'</b><br>N -3.410243 -2.029977 -0.788225<br>C -2.111536 -2.041572 -0.960712<br>N -1.259236 -1.015774 -0.709482<br>C -1.841821 0.137404 -0.274574<br>C -3.213867 0.221061 -0.036616<br>C -4.011646 -0.909315 -0.307166<br>N -1.321318 1.361799 0.033854<br>C -2.401472 2.127090 0.448511<br>N -3.540915 1.481712 0.419302<br>C 0.622640 4.149888 0.162393<br>C 0.064477 1.882466 -0.096057<br>C 0.776207 2.050638 1.253097<br>C 1.567865 3.345753 1.047076<br>O -0.012806 3.167938 -0.693649<br>H -2.271317 3.157375 0.737262<br>H 1.118377 4.871513 -0.485848<br>H -0.142860 4.665696 0.752753<br>H 0.584499 1.265782 -0.767649<br>H 1.392570 1.186498 1.486489<br>H 0.036462 2.171079 2.048166<br>H 1.799195 3.854011 1.983516<br>H 2.503473 3.144594 0.519549<br>N -5.329510 -0.927215 -0.116462<br>H -5.809556 -0.114513 0.237626<br>H -5.857837 -1.759226 -0.330669<br>C 0.556053 -0.878019 -2.278252<br>C 1.888473 -0.691600 -2.705963<br>C 0.170986 -1.121736 -0.953448<br>C 2.897754 -0.645479 -1.645376<br>O 2.194193 -0.521281 -3.956328<br>C 1.099772 -1.180124 0.106902<br>C 2.468046 -0.897877 -0.279902<br>O 4.126499 -0.389066 -1.912398<br>C 0.804631 -1.465634 1.492233<br>C 3.446885 -0.837220 0.742327<br>C 1.802559 -1.366355 2.450854<br>C -0.574326 -1.914936 1.926565<br>C 3.128742 -1.036421 2.059881<br>H 4.463232 -0.613128 0.442654<br>C 1.541495 -1.607962 3.922327<br>H -1.305160 -1.100030 1.946658<br>H -0.548902 -2.333339 2.930131<br>H -0.965878 -2.693532 1.270351<br>H 3.896732 -0.962561 2.823304<br>H 0.728448 -0.984949 4.305968<br>H 2.435831 -1.379527 4.504959<br>H 1.273800 -2.649329 4.131182<br>H -1.631081 -2.940205 -1.325765<br>H -0.226068 -0.801050 -3.029151 |
| <b>E'-QH-G<sup>+</sup>R'</b><br>C 0.648101 0.712422 2.218334<br>C 1.405469 1.353598 1.037935                                                                                                                                                                                                                                                                                                                                                                                                                                                                                                                                                                                                                                                                                                                                                                                                                                                                                                                                                                                                                                                                                                                                                                                                                                                                                                                                                                                                                                                                                                                                                                                                                                                                                                                                                                                                    | <b>Eq'-QH-G<sup>+</sup>R'</b><br>C 1.008041 0.466032 2.460587<br>C 1.317172 1.246870 1.160218                                                                                                                                                                                                                                                                                                                                                                                                                                                                                                                                                                                                                                                                                                                                                                                                                                                                                                                                                                                                                                                                                                                                                                                                                                                                                                                                                                                                                                                                                                                                                                                                                                                                                                                        | <b>Eqn'-QH-G<sup>+</sup>R'</b><br>C 0.276051 1.403770 1.686024<br>C 1.700722 1.355878 1.176897                                                                                                                                                                                                                                                                                                                                                                                                                                                                                                                                                                                                                                                                                                                                                                                                                                                                                                                                                                                                                                                                                                                                                                                                                                                                                                                                                                                                                                                                                                                                                                                                                                                     |

|                                                                                                                                                                                                                                                                                                                                                                                                                                                                                                                                                                                                                                                                                                                                                                                                                                                                                                                                                                                                                                                                                                                                                                                                                                                                                                                                                                                                                                                                                                                                                                                                                                                                                                                                                                                                                                     |                                                                                                                                                                                                                                                                                                                                                                                                                                                                                                                                                                                                                                                                                                                                                                                                                                                                                                                                                                                                                                                                                                                                                                                                                                                                                                                                                                                                                                                                                                                                                                                                                                                                                                                                                                    |                                                                                                                                                                                                                                                                                                                                                                                                                                                                                                                                                                                                                                                                                                                                                                                                                                                                                                                                                                                                                                                                                                                                                                                                                                                                                                                                                                                                                                                                                                                                                                                                                                                                                                      |
|-------------------------------------------------------------------------------------------------------------------------------------------------------------------------------------------------------------------------------------------------------------------------------------------------------------------------------------------------------------------------------------------------------------------------------------------------------------------------------------------------------------------------------------------------------------------------------------------------------------------------------------------------------------------------------------------------------------------------------------------------------------------------------------------------------------------------------------------------------------------------------------------------------------------------------------------------------------------------------------------------------------------------------------------------------------------------------------------------------------------------------------------------------------------------------------------------------------------------------------------------------------------------------------------------------------------------------------------------------------------------------------------------------------------------------------------------------------------------------------------------------------------------------------------------------------------------------------------------------------------------------------------------------------------------------------------------------------------------------------------------------------------------------------------------------------------------------------|--------------------------------------------------------------------------------------------------------------------------------------------------------------------------------------------------------------------------------------------------------------------------------------------------------------------------------------------------------------------------------------------------------------------------------------------------------------------------------------------------------------------------------------------------------------------------------------------------------------------------------------------------------------------------------------------------------------------------------------------------------------------------------------------------------------------------------------------------------------------------------------------------------------------------------------------------------------------------------------------------------------------------------------------------------------------------------------------------------------------------------------------------------------------------------------------------------------------------------------------------------------------------------------------------------------------------------------------------------------------------------------------------------------------------------------------------------------------------------------------------------------------------------------------------------------------------------------------------------------------------------------------------------------------------------------------------------------------------------------------------------------------|------------------------------------------------------------------------------------------------------------------------------------------------------------------------------------------------------------------------------------------------------------------------------------------------------------------------------------------------------------------------------------------------------------------------------------------------------------------------------------------------------------------------------------------------------------------------------------------------------------------------------------------------------------------------------------------------------------------------------------------------------------------------------------------------------------------------------------------------------------------------------------------------------------------------------------------------------------------------------------------------------------------------------------------------------------------------------------------------------------------------------------------------------------------------------------------------------------------------------------------------------------------------------------------------------------------------------------------------------------------------------------------------------------------------------------------------------------------------------------------------------------------------------------------------------------------------------------------------------------------------------------------------------------------------------------------------------|
| H 0.254530 1.484053 2.884754<br>H 1.328044 0.079689 2.795308<br>H -0.193221 0.097735 1.900555<br>C 2.044156 0.280411 0.151145<br>C 2.397964 2.407513 1.596586<br>H 0.677277 1.906802 0.434978<br>C 3.643392 2.550937 0.726874<br>C 3.441243 0.157149 0.039357<br>H 2.740750 2.044459 2.574852<br>C 1.250704 -0.648394 -0.538702<br>C 1.695584 3.751477 1.808204<br>C 4.356867 1.208317 0.613933<br>H 3.359800 2.904099 -0.273047<br>C 1.792246 -1.707217 -1.281149<br>H 4.308029 3.306697 1.158066<br>C 4.037185 -0.914549 -0.682553<br>N -0.188738 -0.533555 -0.538380<br>H 1.391879 4.178935 0.846683<br>H 2.361390 4.466845 2.299189<br>H 0.799600 3.650745 2.426507<br>C 3.157945 -1.839913 -1.330261<br>H 4.728882 0.910103 1.604752<br>H 5.240261 1.279166 -0.025864<br>H 1.142880 -2.400461 -1.802477<br>O 5.309331 -1.111877 -0.817341<br>C -0.866423 0.468484 -1.096724<br>C -1.116920 -1.411518 0.025232<br>O 3.781262 -2.841525 -2.027802<br>N -2.187807 0.299493 -0.899440<br>H -0.429267 1.285087 -1.641127<br>C -0.982856 -2.607844 0.801083<br>C -2.378535 -0.882570 -0.207234<br>H 4.728813 -2.628381 -1.876682<br>N -3.565345 -1.375923 0.168557<br>O 0.023728 -3.197994 1.160430<br>N -2.264793 -3.087721 1.160564<br>C -3.471279 -2.504179 0.856104<br>H -2.250070 -3.941102 1.706994<br>N -4.588122 -3.124399 1.268171<br>H -4.566719 -3.928314 1.874228<br>H -5.470479 -2.661432 1.118173<br>C -3.262472 1.241887 -1.329332<br>C -3.951252 1.902275 -0.116827<br>H -3.939814 0.659585 -1.952944<br>C -3.935027 3.394693 -0.483974<br>H -3.366174 1.717303 0.785226<br>H -4.951401 1.502405 0.036989<br>C -2.685423 3.496437 -1.346060<br>H -4.818066 3.660960 -1.068378<br>H -3.891206 4.038484 0.394445<br>H -2.697385 4.304941 -2.074137<br>H -1.775679 3.565059 -0.740694<br>O -2.673451 2.253242 -2.099596 | H 0.510417 1.106809 3.192648<br>H 1.935266 0.092820 2.901756<br>H 0.357285 -0.387384 2.261419<br>C 2.014630 0.345534 0.155339<br>C 2.127035 2.486576 1.482192<br>H 0.359156 1.579454 0.750418<br>C 3.458559 2.466777 1.400053<br>C 3.415962 0.311639 0.105222<br>C 1.294977 -0.516268 -0.677201<br>C 1.348048 3.689106 1.937163<br>C 4.236201 1.271402 0.929599<br>C 1.922017 -1.423307 -1.543231<br>H 4.027292 3.349588 1.681561<br>C 4.100538 -0.596234 -0.745907<br>N -0.149320 -0.500567 -0.651147<br>H 0.667161 4.029918 1.148466<br>H 2.008138 4.517074 2.203432<br>H 0.725134 3.455474 2.807497<br>C 3.296168 -1.456916 -1.563935<br>H 4.678053 0.750353 1.793947<br>H 5.099019 1.593161 0.337083<br>H 1.334206 -2.077663 -2.176061<br>O 5.385404 -0.704855 -0.852328<br>C -0.900161 0.454165 -1.198913<br>C -1.004266 -1.400517 -0.014402<br>O 4.002678 -2.302272 -2.378431<br>N -2.200179 0.228559 -0.933846<br>H -0.524541 1.284369 -1.768966<br>C -0.775290 -2.590356 0.748409<br>C -2.299360 -0.938970 -0.197263<br>H 4.930234 -2.063164 -2.157661<br>N -3.440521 -1.480087 0.248231<br>O 0.275763 -3.139254 1.040267<br>N -2.012078 -3.120599 1.184450<br>C -3.257761 -2.590698 0.946223<br>H -1.931778 -3.974584 1.724293<br>N -4.321160 -3.251895 1.431776<br>H -4.225360 -4.018060 2.078587<br>H -5.226531 -2.818515 1.340702<br>C -3.339085 1.105695 -1.340852<br>C -4.025944 1.742336 -0.114422<br>H -4.001122 0.479597 -1.937830<br>C -4.090276 3.231325 -0.490856<br>H -3.410531 1.591700 0.773603<br>H -5.001881 1.297366 0.067952<br>C -2.874916 3.384589 -1.393112<br>H -5.002741 3.452225 -1.048274<br>H -4.048614 3.882755 0.381993<br>H -2.947424 4.186191 -2.125224<br>H -1.950357 3.499516 -0.817684<br>O -2.830270 2.137685 -2.139428 | H 0.230599 1.904374 2.650833<br>H -0.139629 0.407986 1.830653<br>H -0.395100 1.952313 1.017001<br>C 2.137122 0.371656 0.214825<br>C 2.614366 2.264251 1.700214<br>C 3.984822 2.184307 1.349849<br>C 3.549360 0.270359 -0.066835<br>C 1.301615 -0.543006 -0.484128<br>C 2.198339 3.346286 2.672136<br>C 4.439679 1.196943 0.515934<br>C 1.812802 -1.528364 -1.326349<br>H 4.677857 2.902642 1.774380<br>C 4.097141 -0.750596 -0.933692<br>N -0.139258 -0.458653 -0.455665<br>H 1.353379 3.930980 2.299454<br>H 3.027616 4.032488 2.850471<br>H 1.901010 2.932519 3.641496<br>C 3.172734 -1.647797 -1.524825<br>H 5.491626 1.103347 0.276526<br>H 1.129631 -2.193140 -1.842989<br>O 5.346056 -0.888727 -1.200850<br>C -0.851915 0.477740 -1.080372<br>C -1.033048 -1.335815 0.157529<br>O 3.704668 -2.611229 -2.346653<br>N -2.166539 0.266787 -0.879566<br>H -0.441005 1.280623 -1.664982<br>C -0.852016 -2.475097 1.005444<br>C -2.313347 -0.876183 -0.113055<br>H 4.662677 -2.413689 -2.313034<br>N -3.480060 -1.397896 0.285299<br>O 0.178809 -2.996087 1.402023<br>N -2.114013 -2.987256 1.389249<br>C -3.342197 -2.476742 1.041814<br>H -2.066967 -3.803437 1.988435<br>N -4.435174 -3.119854 1.482061<br>H -4.385285 -3.872942 2.148835<br>H -5.333599 -2.698799 1.305435<br>C -3.281038 1.113030 -1.400442<br>C -4.053976 1.801304 -0.257519<br>H -3.898296 0.449996 -2.006247<br>C -4.148207 3.257565 -0.738440<br>H -3.480768 1.734112 0.668246<br>H -5.021937 1.332325 -0.094129<br>C -2.878878 3.402064 -1.564941<br>H -5.027487 3.402284 -1.369419<br>H -4.191939 3.966288 0.088489<br>H -2.932458 4.147275 -2.356046<br>H -2.003134 3.599230 -0.938400<br>O -2.728564 2.110045 -2.215154 |
| <b>E'-Q(H)H-A+R'</b><br>N 2.551781 -2.569239 1.467759<br>C 1.334933 -2.097625 1.548507<br>N 0.865125 -0.974220 0.939797<br>C 1.781537 -0.277732 0.205699<br>C 3.086391 -0.735935 0.045014<br>C 3.471188 -1.925113 0.699738<br>N 1.684969 0.888022 -0.505500<br>C 2.947168 1.076564 -1.059272<br>N 3.798672 0.130344 -0.758280<br>C 1.624742 3.791808 0.352563<br>C 0.586191 1.899678 -0.458461<br>C 0.625974 2.849601 -1.659467<br>C 1.400033 4.087503 -1.141570<br>O 0.726453 2.706863 0.681015<br>C 3.164039 1.929719 -1.680615<br>H 1.372505 4.620328 1.011576<br>H 2.654360 3.481371 0.556477                                                                                                                                                                                                                                                                                                                                                                                                                                                                                                                                                                                                                                                                                                                                                                                                                                                                                                                                                                                                                                                                                                                                                                                                                                   | <b>Eq'-Q(H)H-A+R'</b><br>N -3.079132 -2.467122 -0.566301<br>C -1.794413 -2.304744 -0.744332<br>N -1.115679 -1.127110 -0.669459<br>C -1.876679 -0.025271 -0.402192<br>C -3.249639 -0.122196 -0.179143<br>C -3.857666 -1.391663 -0.266233<br>N -1.557694 1.295582 -0.280115<br>C -2.752007 1.937272 0.016751<br>N -3.776693 1.125023 0.082382<br>C -0.025910 4.329689 -0.454864<br>C -0.256753 1.993274 -0.444799<br>C 0.367626 2.418150 0.890961<br>C 0.981746 3.779010 0.547556<br>O -0.486984 3.170874 -1.196460<br>H -2.785759 3.005723 0.152867<br>H 0.395197 5.027822 -1.176997<br>H -0.878471 4.801645 0.045012                                                                                                                                                                                                                                                                                                                                                                                                                                                                                                                                                                                                                                                                                                                                                                                                                                                                                                                                                                                                                                                                                                                                               | <b>Eqn'-Q(H)H-A+R'</b><br>N 3.301965 -2.271375 0.478159<br>C 2.003833 -2.242993 0.626483<br>N 1.209659 -1.140962 0.543171<br>C 1.859632 0.038171 0.317400<br>C 3.239537 0.083038 0.119321<br>C 3.972583 -1.118549 0.206202<br>N 1.413355 1.324597 0.216793<br>C 2.543861 2.086820 -0.043596<br>N 3.644844 1.381320 -0.107115<br>C -0.366414 4.208726 0.453144<br>C 0.053945 1.899282 0.403168<br>C -0.624786 2.291283 -0.917643<br>C -1.338658 3.595177 -0.546581<br>O 0.187129 3.078589 1.175048<br>H 2.475395 3.156625 -0.152609<br>H -0.830936 4.863905 1.188690<br>H 0.443326 4.749572 -0.048671                                                                                                                                                                                                                                                                                                                                                                                                                                                                                                                                                                                                                                                                                                                                                                                                                                                                                                                                                                                                                                                                                                 |

|                                                                                                                                                                                                                                                                                                                                                                                                                                                                                                                                                                                                                                                                                                                                                                                                                                                                                                                                                                                                                                                                                                                                                                                                                                                                                                        |                                                                                                                                                                                                                                                                                                                                                                                                                                                                                                                                                                                                                                                                                                                                                                                                                                                                                                                                                                                                                                                                                                                                                                                                           |                                                                                                                                                                                                                                                                                                                                                                                                                                                                                                                                                                                                                                                                                                                                                                                                                                                                                                                                                                                                                                                                                                                                                                                              |
|--------------------------------------------------------------------------------------------------------------------------------------------------------------------------------------------------------------------------------------------------------------------------------------------------------------------------------------------------------------------------------------------------------------------------------------------------------------------------------------------------------------------------------------------------------------------------------------------------------------------------------------------------------------------------------------------------------------------------------------------------------------------------------------------------------------------------------------------------------------------------------------------------------------------------------------------------------------------------------------------------------------------------------------------------------------------------------------------------------------------------------------------------------------------------------------------------------------------------------------------------------------------------------------------------------|-----------------------------------------------------------------------------------------------------------------------------------------------------------------------------------------------------------------------------------------------------------------------------------------------------------------------------------------------------------------------------------------------------------------------------------------------------------------------------------------------------------------------------------------------------------------------------------------------------------------------------------------------------------------------------------------------------------------------------------------------------------------------------------------------------------------------------------------------------------------------------------------------------------------------------------------------------------------------------------------------------------------------------------------------------------------------------------------------------------------------------------------------------------------------------------------------------------|----------------------------------------------------------------------------------------------------------------------------------------------------------------------------------------------------------------------------------------------------------------------------------------------------------------------------------------------------------------------------------------------------------------------------------------------------------------------------------------------------------------------------------------------------------------------------------------------------------------------------------------------------------------------------------------------------------------------------------------------------------------------------------------------------------------------------------------------------------------------------------------------------------------------------------------------------------------------------------------------------------------------------------------------------------------------------------------------------------------------------------------------------------------------------------------------|
| H -0.337947 1.342989 -0.364090<br>H -0.402157 3.112532 -1.903352<br>H 1.061601 2.392785 -2.546252<br>H 2.348106 4.229300 -1.661410<br>H 0.809896 4.992643 -1.279304<br>N 4.693168 -2.439326 0.605792<br>H 5.400446 -1.987727 0.046548<br>H 4.922720 -3.286618 1.103093<br>C -0.930074 0.106049 2.185656<br>C -2.235313 0.530332 2.264136<br>C -0.535077 -0.600753 1.042428<br>C -3.180967 0.296391 1.214237<br>O -2.720302 1.233381 3.334317<br>C -1.408337 -0.891033 -0.014090<br>C -2.734056 -0.433368 0.074883<br>O -4.372894 0.769691 1.373812<br>H -3.650821 1.395442 3.062250<br>C -0.935419 -1.698857 -1.217279<br>C -3.731524 -0.625045 -1.043338<br>C -1.779543 -1.395647 -2.472389<br>C -0.918888 -3.206303 -0.899386<br>H 0.094550 -1.412222 -1.453751<br>C -3.268336 -1.575199 -2.151117<br>H -3.958345 0.361425 -1.468655<br>H -4.680316 -0.970972 -0.622147<br>C -1.476445 -0.003443 -3.037238<br>H -1.499654 -2.132042 -3.233962<br>H -0.606850 -3.777392 -1.778557<br>H -1.906325 -3.557392 -0.593207<br>H -0.225172 -3.438860 -0.089694<br>H -3.867299 -1.411938 -3.052376<br>H -3.446446 -2.610304 -1.846149<br>H -0.416569 0.092228 -3.289180<br>H -1.722426 0.783791 -2.320640<br>H -2.057202 0.182587 -3.945091<br>H 0.599023 -2.623068 2.143506<br>H -0.216854 0.331593 2.969330 | H 0.380608 1.320209 -1.011090<br>H 1.089817 1.685856 1.245750<br>H -0.414564 2.526062 1.645690<br>H 1.097419 4.421697 1.420427<br>H 1.958922 3.653680 0.075253<br>N -5.158467 -1.586105 -0.072862<br>H -5.768199 -0.813884 0.148079<br>H -5.545831 -2.514329 -0.151370<br>C 0.802158 -0.989022 -2.175312<br>C 2.157702 -0.852590 -2.362860<br>C 0.322226 -1.071532 -0.858848<br>C 3.082856 -0.775600 -1.267986<br>O 2.726297 -0.766743 -3.603722<br>C 1.165946 -1.015550 0.253771<br>C 2.541852 -0.854079 0.044561<br>O 4.333077 -0.635097 -1.556994<br>H 3.678947 -0.666550 -3.382958<br>C 0.621234 -1.167759 1.663876<br>C 3.484934 -0.712935 1.211794<br>C 1.491008 -0.480673 2.697924<br>C 0.464156 -2.664187 2.026558<br>H -0.375306 -0.716532 1.718864<br>C 2.797203 -0.313541 2.485006<br>H 4.252084 0.024184 0.953233<br>H 4.045210 -1.648578 1.365794<br>C 0.803605 -0.047539 3.962102<br>H 0.091450 -2.781621 3.046768<br>H 1.429726 -3.169249 1.950707<br>H -0.235728 -3.165190 1.354765<br>H 3.411499 0.141752 3.257657<br>H 0.034413 0.702601 3.744904<br>H 1.510449 0.381813 4.674666<br>H 0.293814 -0.885810 4.448733<br>H -1.175887 -3.162420 -0.975603<br>H 0.117603 -1.014111 -3.015008 | H -0.512446 1.164703 0.967382<br>H -1.291883 1.509461 -1.270961<br>H 0.133525 2.466626 -1.683870<br>H -1.515297 4.239137 -1.408276<br>H -2.297016 3.385854 -0.065493<br>N 5.290147 -1.175734 0.039985<br>H 5.821009 -0.341340 -0.157292<br>H 5.770305 -2.059317 0.121371<br>C -0.627671 -1.217780 2.081671<br>C -1.960348 -1.089515 2.413904<br>C -0.224305 -1.220667 0.745765<br>C -2.959953 -0.884219 1.428028<br>O -2.387433 -1.100712 3.717215<br>C -1.147590 -1.091658 -0.330860<br>C -2.521856 -0.876274 0.047224<br>O -4.171955 -0.713544 1.807183<br>H -3.349642 -0.945795 3.630028<br>C -0.819703 -1.134547 -1.735276<br>C -3.484142 -0.629098 -0.953897<br>C -1.798922 -0.854909 -2.682203<br>C 0.562688 -1.512962 -2.220667<br>C -3.130085 -0.590246 -2.276774<br>H -4.506517 -0.459233 -0.640667<br>C -1.498910 -0.827753 -4.164476<br>H 1.293199 -0.707164 -2.101223<br>H 0.545068 -1.760603 -3.278845<br>H 0.944769 -2.391081 -1.700876<br>H -3.875799 -0.374617 -3.034039<br>H -0.664949 -0.161758 -4.400794<br>H -2.371501 -0.479832 -4.718993<br>H -1.239660 -1.819547 -4.548347<br>H 1.469625 -3.163276 0.825625<br>H 0.121297 -1.279855 2.863314                          |
| <b>E'-QH<sub>2</sub>-G<sup>+</sup>R'</b><br>C -1.746285 -1.341284 1.554333<br>C -3.103153 -1.560545 1.711031<br>C -4.009516 -0.805791 0.956234<br>C -3.583218 0.149530 0.029848<br>C -2.204103 0.366706 -0.151292<br>C -1.328382 -0.386627 0.634335<br>O -3.543975 -2.489778 2.605787<br>O -5.324969 -1.074208 1.222645<br>C -4.633400 0.967140 -0.692500<br>C -4.082536 1.851050 -1.816648<br>C -2.731449 2.472276 -1.446166<br>C -1.697939 1.357529 -1.188172<br>C -1.293130 0.632664 -2.486004<br>C -2.836004 3.428260 -0.252287<br>N 2.084766 -2.591863 -1.477052<br>C 3.292410 -1.967539 -1.270567<br>N 3.414514 -0.865664 -0.544348<br>C 2.258128 -0.423250 -0.040652<br>C 1.001182 -0.985309 -0.194470<br>C 0.833322 -2.173740 -0.975488<br>N 2.087910 0.708164 0.751986<br>C 0.783429 0.805769 1.069027<br>N 0.098864 -0.188464 0.508011<br>O -0.187975 -2.792627 -1.228703<br>N 4.378435 -2.498666 -1.850665<br>C 5.362473 0.953178 1.429381<br>C 3.140926 1.645212 1.228036<br>C 3.929495 2.285753 0.071625<br>C 5.381349 2.210189 0.567229<br>O 4.048969 0.958244 2.049645<br>H -1.030365 -1.903645 2.138874<br>H -4.511220 -2.503628 2.582375<br>H -5.145410 1.593145 0.048885                                                                                                             | <b>Eq'-QH<sub>2</sub>-G<sup>+</sup>R'</b><br>C 1.828818 -1.546962 -1.401499<br>C 3.189991 -1.769777 -1.511009<br>C 4.084545 -0.900394 -0.870342<br>C 3.632643 0.186516 -0.121518<br>C 2.252690 0.402820 0.020637<br>C 1.388261 -0.471266 -0.637937<br>O 3.648967 -2.821108 -2.246444<br>O 5.403400 -1.209298 -1.062837<br>C 4.623415 1.140922 0.503037<br>C 4.024004 2.484959 0.811510<br>C 2.715884 2.681948 0.973336<br>C 1.748429 1.516973 0.915942<br>C 1.481424 0.982315 2.343979<br>C 2.119474 4.027881 1.271431<br>N -1.960033 -2.329698 1.873097<br>C -3.181299 -1.771771 1.576092<br>N -3.331289 -0.815632 0.670547<br>C -2.188826 -0.448983 0.082013<br>C -0.920091 -0.955048 0.314541<br>C -0.722349 -1.986494 1.288032<br>N -2.048255 0.527719 -0.899687<br>C -0.750073 0.588217 -1.248438<br>N -0.040992 -0.281293 -0.531822<br>O 0.312861 -2.536294 1.629468<br>N -4.251549 -2.212380 2.252869<br>C -5.331688 0.600005 -1.565695<br>C -3.122063 1.353990 -1.515100<br>C -3.910193 2.168722 -0.473503<br>C -5.365961 1.983870 -0.927360<br>O -4.025677 0.524073 -2.197241<br>H 1.126331 -2.204739 -1.895803<br>H 4.615824 -2.825576 -2.206831<br>H 5.474915 1.288158 -0.171907               | <b>Eqn'-QH<sub>2</sub>-G<sup>+</sup>R'</b><br>C 1.763689 -1.672906 -1.081834<br>C 3.110013 -1.997817 -1.271532<br>C 4.080199 -1.096756 -0.882282<br>C 3.738304 0.139377 -0.275644<br>C 2.360683 0.456673 0.008813<br>C 1.410472 -0.494881 -0.467731<br>O 3.426616 -3.184994 -1.858643<br>O 5.366049 -1.471193 -1.165474<br>C 4.743885 1.079847 0.050364<br>C 4.415672 2.263830 0.650619<br>C 3.081211 2.568987 1.006630<br>C 2.058231 1.671328 0.719392<br>C 0.664672 2.000542 1.206422<br>C 2.823701 3.883357 1.706184<br>N -1.985529 -2.015603 2.198955<br>C -3.204892 -1.533859 1.783680<br>N -3.336730 -0.706019 0.756159<br>C -2.180304 -0.397100 0.163567<br>C -0.914815 -0.852408 0.496026<br>C -0.732310 -1.721077 1.619577<br>N -2.015921 0.459953 -0.921808<br>C -0.707362 0.497623 -1.231877<br>N -0.014594 -0.265371 -0.390078<br>O 0.301989 -2.176667 2.080656<br>N -4.294050 -1.909877 2.467999<br>C -5.273064 0.400536 -1.700703<br>C -3.076543 1.192190 -1.666594<br>C -3.910404 2.110451 -0.754858<br>C -5.347438 1.848484 -1.230122<br>O -3.945243 0.274154 -2.276679<br>H 1.000018 -2.358034 -1.426296<br>H 4.391143 -3.258034 -1.896868<br>H 5.780540 0.886309 -0.195744 |

|                                                                                                                                                                                                                                                                                                                                                                                                                                                                                                                                                                                                                                                                                                                                                                                                                                                                                                                                                                                                                                                                                                                                                                                                                                                                                                                                                                                                                                                                                                                                                                                                                                                                                                     |                                                                                                                                                                                                                                                                                                                                                                                                                                                                                                                                                                                                                                                                                                                                                                                                                                                                                                                                                                                                                                                                                                                                                                                                                                                                                                                                                                                                                                                                                                                                                                                                                                                                                                         |                                                                                                                                                                                                                                                                                                                                                                                                                                                                                                                                                                                                                                                                                                                                                                                                                                                                                                                                                                                                                                                                                                                                                                                                                                                                                                                                                                                                                                                                                                                                                                                                                                                                                                            |
|-----------------------------------------------------------------------------------------------------------------------------------------------------------------------------------------------------------------------------------------------------------------------------------------------------------------------------------------------------------------------------------------------------------------------------------------------------------------------------------------------------------------------------------------------------------------------------------------------------------------------------------------------------------------------------------------------------------------------------------------------------------------------------------------------------------------------------------------------------------------------------------------------------------------------------------------------------------------------------------------------------------------------------------------------------------------------------------------------------------------------------------------------------------------------------------------------------------------------------------------------------------------------------------------------------------------------------------------------------------------------------------------------------------------------------------------------------------------------------------------------------------------------------------------------------------------------------------------------------------------------------------------------------------------------------------------------------|---------------------------------------------------------------------------------------------------------------------------------------------------------------------------------------------------------------------------------------------------------------------------------------------------------------------------------------------------------------------------------------------------------------------------------------------------------------------------------------------------------------------------------------------------------------------------------------------------------------------------------------------------------------------------------------------------------------------------------------------------------------------------------------------------------------------------------------------------------------------------------------------------------------------------------------------------------------------------------------------------------------------------------------------------------------------------------------------------------------------------------------------------------------------------------------------------------------------------------------------------------------------------------------------------------------------------------------------------------------------------------------------------------------------------------------------------------------------------------------------------------------------------------------------------------------------------------------------------------------------------------------------------------------------------------------------------------|------------------------------------------------------------------------------------------------------------------------------------------------------------------------------------------------------------------------------------------------------------------------------------------------------------------------------------------------------------------------------------------------------------------------------------------------------------------------------------------------------------------------------------------------------------------------------------------------------------------------------------------------------------------------------------------------------------------------------------------------------------------------------------------------------------------------------------------------------------------------------------------------------------------------------------------------------------------------------------------------------------------------------------------------------------------------------------------------------------------------------------------------------------------------------------------------------------------------------------------------------------------------------------------------------------------------------------------------------------------------------------------------------------------------------------------------------------------------------------------------------------------------------------------------------------------------------------------------------------------------------------------------------------------------------------------------------------|
| H -5.398850 0.304724 -1.113386<br>H -4.808585 2.635614 -2.044228<br>H -3.971190 1.256385 -2.726271<br>H -2.376031 3.046872 -2.307719<br>H -0.799903 1.842931 -0.797210<br>H -0.953386 1.357741 -3.230214<br>H -2.129044 0.071129 -2.907398<br>H -0.480647 -0.072823 -2.310233<br>H -1.873251 3.909304 -0.059240<br>H -3.132153 2.906596 0.661872<br>H -3.573852 4.211745 -0.445315<br>H 2.048093 -3.427130 -2.050147<br>H 0.350362 1.575942 1.684807<br>H 5.274607 -2.086828 -1.643127<br>H 4.359039 -3.391805 -2.315800<br>H 6.092617 0.952751 2.237100<br>H 5.466151 0.047227 0.828505<br>H 2.601510 2.377166 1.829055<br>H 3.585749 3.301549 -0.116779<br>H 3.801461 1.702530 -0.839179<br>H 6.096910 2.141250 -0.252370<br>H 5.630057 3.083489 1.174125<br>H -5.912084 -0.576855 0.641511                                                                                                                                                                                                                                                                                                                                                                                                                                                                                                                                                                                                                                                                                                                                                                                                                                                                                                       | H 5.044668 0.699331 1.418175<br>H 4.715879 3.316288 0.903542<br>H 0.798965 1.890467 0.523845<br>H 1.120711 1.783623 2.992105<br>H 2.401043 0.577936 2.772595<br>H 0.732046 0.189924 2.335433<br>H 1.422054 4.323447 0.479772<br>H 2.889605 4.796280 1.357760<br>H 1.546675 4.010111 2.204549<br>H -1.902201 -3.050987 2.583029<br>H -0.339266 1.245857 -1.995808<br>H -5.157167 -1.857463 1.988728<br>H -4.211086 -3.010495 2.865998<br>H -6.070739 0.450233 -2.351085<br>H -5.410109 -0.193389 -0.819453<br>H -2.600590 1.981879 -2.237555<br>H -3.584934 3.207737 -0.466523<br>H -3.759656 1.752475 0.521529<br>H -6.070180 2.041177 -0.097136<br>H -5.639611 2.737630 -1.668797<br>H 5.983048 -0.640558 -0.543666                                                                                                                                                                                                                                                                                                                                                                                                                                                                                                                                                                                                                                                                                                                                                                                                                                                                                                                                                                                    | H 5.194649 2.983333 0.874006<br>H 0.705632 2.744801 1.997360<br>H 0.158518 1.132353 1.622929<br>H 0.032643 2.416315 0.415969<br>H 2.040208 4.461974 1.211183<br>H 3.730773 4.488382 1.718917<br>H 2.511475 3.735020 2.744630<br>H -1.940082 -2.624525 3.008293<br>H -0.277406 1.062839 -2.041135<br>H -5.193544 -1.608384 2.127505<br>H -4.266371 -2.618798 3.182987<br>H -5.982761 0.147586 -2.486671<br>H -5.366282 -0.301788 -0.869746<br>H -2.536386 1.739497 -2.439302<br>H -3.599098 3.148365 -0.860449<br>H -3.788268 1.817362 0.286822<br>H -6.079753 1.989739 -0.434966<br>H -5.606472 2.505791 -2.062930<br>H 6.001707 -1.040626 -0.582533                                                                                                                                                                                                                                                                                                                                                                                                                                                                                                                                                                                                                                                                                                                                                                                                                                                                                                                                                                                                                                                       |
| <b>E<sup>+</sup>-QH<sub>2</sub>-A<sup>+</sup>R<sup>+</sup></b><br>N -2.509545 -2.572848 -1.508093<br>C -1.305001 -2.076652 -1.567460<br>N -0.867993 -0.953688 -0.927547<br>C -1.805399 -0.288874 -0.187743<br>C -3.102983 -0.775206 -0.060228<br>C -3.454484 -1.960314 -0.742003<br>N -1.742710 0.862915 0.547566<br>C -3.019745 1.018977 1.079125<br>N -3.845951 0.062633 0.743748<br>C -1.672637 3.744496 -0.359905<br>C -0.654902 1.888083 0.544882<br>C -0.769529 2.859201 1.722456<br>C -1.539678 4.070129 1.139335<br>O -0.737590 2.668861 -0.615526<br>H -3.265196 1.858472 1.708233<br>H -1.396022 4.564699 -1.019161<br>H -2.682457 3.410014 -0.616781<br>H 0.281012 1.344704 0.518594<br>H 0.241950 3.145879 2.006446<br>H -1.236346 2.413245 2.598779<br>H -2.518607 4.197883 1.602123<br>H -0.978416 4.990511 1.294707<br>H -4.664606 -2.499618 -0.677731<br>H -5.390336 -2.072612 -0.122169<br>H -4.869057 -3.342502 -1.193818<br>C 0.902912 0.171652 -2.140393<br>C 2.214374 0.604277 -2.239326<br>C 0.525437 -0.553626 -1.017415<br>C 3.109563 0.316542 -1.201884<br>O 2.611166 1.322197 -3.325924<br>C 1.400622 -0.881861 0.023504<br>C 2.725808 -0.421242 -0.077174<br>O 4.364278 0.827617 -1.382330<br>H 3.546446 1.548247 -3.222715<br>C 0.946233 -1.711372 1.215046<br>C 3.742553 -0.632059 1.024610<br>C 1.800556 -1.412472 2.464386<br>C 0.944423 -3.213302 0.870714<br>H -0.083757 -1.436491 1.460573<br>C 3.285686 -1.590667 2.129911<br>H 3.976474 0.346837 1.461288<br>H 4.680450 -1.008898 0.600669<br>C 1.499044 -0.026464 3.045222<br>H 1.531563 -2.157149 3.220153<br>H 0.652931 -3.797932 1.746941<br>H 1.930052 -3.548847 0.543316<br>H 0.239270 -3.441983 0.070343 | <b>Eq<sup>+</sup>-QH<sub>2</sub>-A<sup>+</sup>R<sup>+</sup></b><br>N -2.959595 -2.612208 -0.447878<br>C -1.687926 -2.397760 -0.637047<br>N -1.070021 -1.180919 -0.623291<br>C -1.883611 -0.102113 -0.414103<br>C -3.249086 -0.260517 -0.183181<br>C -3.792464 -1.562191 -0.200661<br>N -1.635065 1.237946 -0.362329<br>C -2.863387 1.829821 -0.096982<br>N -3.841558 0.967897 0.013465<br>C -0.267858 4.338551 -0.732938<br>C -0.377674 1.998774 -0.581649<br>C 0.236662 2.533142 0.719166<br>C 0.775610 3.900945 0.288210<br>O -0.680126 3.113613 -1.395335<br>H -2.955218 2.900504 -0.018965<br>H 0.111983 5.008239 -1.503027<br>H -1.138265 4.798579 -0.253748<br>H 0.291746 1.333023 -1.119217<br>H 1.001113 1.864183 1.108918<br>H -0.542731 2.644074 1.475984<br>H 0.864472 4.598943 1.120613<br>H 1.754032 3.798274 -0.186583<br>N -5.078655 -1.812298 0.007490<br>H -5.726798 -1.061465 0.191222<br>H -5.418427 -2.762129 -0.021064<br>C 0.868033 -1.106695 -2.087906<br>C 2.234870 -0.984519 -2.273823<br>C 0.367732 -1.080449 -0.789699<br>C 3.069721 -0.814968 -1.159004<br>O 2.752728 -1.013832 -3.531135<br>C 1.176324 -0.939181 0.338741<br>C 2.555677 -0.778785 0.138155<br>O 4.394100 -0.680961 -1.465120<br>H 3.714695 -0.924346 -3.472069<br>C 0.612100 -1.001428 1.744511<br>C 3.476271 -0.530252 1.309356<br>C 1.446333 -0.208878 2.730643<br>C 0.499802 -2.471954 2.215029<br>H -0.397427 -0.580166 1.747339<br>C 2.751323 -0.031143 2.527769<br>H 4.235933 0.210085 1.031472<br>H 4.032091 -1.447299 1.552979<br>C 0.726962 0.311525 3.941595<br>H 0.109677 -2.519371 3.233521<br>H 1.482483 -2.947685 2.197635<br>H -0.169739 -3.046836 1.572764<br>H 3.347666 0.500335 3.262535 | <b>Eqn<sup>+</sup>-QH<sub>2</sub>-A<sup>+</sup>R<sup>+</sup></b><br>N -3.166875 -2.468513 -0.082086<br>C -1.875733 -2.390006 -0.238786<br>N -1.151526 -1.238498 -0.349991<br>C -1.870798 -0.076144 -0.331141<br>C -3.251932 -0.086447 -0.140956<br>C -3.910113 -1.327709 -0.013488<br>N -1.506523 1.233393 -0.450440<br>C -2.685984 1.956028 -0.320823<br>N -3.739301 1.202187 -0.137204<br>C 0.098380 4.132474 -1.235153<br>C -0.187592 1.855224 -0.743714<br>C 0.450246 2.531348 0.478646<br>C 1.092150 3.779598 -0.135378<br>O -0.388701 2.854042 -1.722140<br>H -2.685310 3.031098 -0.392573<br>H 0.535853 4.654056 -2.085000<br>H -0.744685 4.715644 -0.850533<br>H 0.432744 1.068066 -1.161876<br>H 1.158374 1.874333 0.977578<br>H -0.326584 2.803536 1.196411<br>H 1.220272 4.585344 0.587374<br>H 2.066837 3.538987 -0.565946<br>N -5.219614 -1.437011 0.165565<br>H -5.802426 -0.615366 0.220697<br>H -5.643549 -2.349482 0.244825<br>C 0.707024 -1.562118 -1.803918<br>C 2.065819 -1.513879 -2.131857<br>C 0.286938 -1.278959 -0.524761<br>C 2.973788 -1.107734 -1.173763<br>O 2.449688 -1.826480 -3.398549<br>C 1.181690 -0.940599 0.536075<br>C 2.561127 -0.789916 0.147019<br>O 4.264693 -1.008420 -1.607925<br>H 3.412816 -1.747411 -3.456372<br>C 0.815167 -0.713505 1.908746<br>C 3.494460 -0.307992 1.094287<br>C 1.766833 -0.227122 2.799059<br>C -0.567601 -1.018843 2.438922<br>C 3.096972 -0.013317 2.369228<br>H 4.527955 -0.141370 0.817537<br>C 1.434479 0.088405 4.238241<br>H -0.553312 -1.074914 3.523710<br>H -0.936174 -1.979211 2.083446<br>H -1.301614 -0.251990 2.176585<br>H 3.818636 0.378819 3.075935<br>H 1.198672 -0.816089 4.807117<br>H 0.574554 0.757501 4.318736 |

|                                                                                                                                                                                                                                                                                                                                                                                                                                                                                                                                                                                                                                                                                                                                                                                                                                                                                                                                                                                                                                                                                                                                                                                                                                                                                                                                                                                                                                                                                                                                                                                                                                                                                                                                                                                                                                                                                                                                                                                                                                  |                                                                                                                                                                                                                                                                                                                                                                                                                                                                                                                                                                                                                                                                                                                                                                                                                                                                                                                                                                                                                                                                                                                                                                                                                                                                                                                                                                                                                                                                                                                                                                                                                                                                                                                                                                                                                                                                                                                                                      |                                                                                                                                                                                                                                                                                                                                                                                                                                                                                                                                                                                                                                                                                                                                                                                                                                                                                                                                                                                                                                                                                                                                                                                                                                                                                                                                                                                                                                                                                                                                                                                                                                                                                                                                                                                                                                                                                           |
|----------------------------------------------------------------------------------------------------------------------------------------------------------------------------------------------------------------------------------------------------------------------------------------------------------------------------------------------------------------------------------------------------------------------------------------------------------------------------------------------------------------------------------------------------------------------------------------------------------------------------------------------------------------------------------------------------------------------------------------------------------------------------------------------------------------------------------------------------------------------------------------------------------------------------------------------------------------------------------------------------------------------------------------------------------------------------------------------------------------------------------------------------------------------------------------------------------------------------------------------------------------------------------------------------------------------------------------------------------------------------------------------------------------------------------------------------------------------------------------------------------------------------------------------------------------------------------------------------------------------------------------------------------------------------------------------------------------------------------------------------------------------------------------------------------------------------------------------------------------------------------------------------------------------------------------------------------------------------------------------------------------------------------|------------------------------------------------------------------------------------------------------------------------------------------------------------------------------------------------------------------------------------------------------------------------------------------------------------------------------------------------------------------------------------------------------------------------------------------------------------------------------------------------------------------------------------------------------------------------------------------------------------------------------------------------------------------------------------------------------------------------------------------------------------------------------------------------------------------------------------------------------------------------------------------------------------------------------------------------------------------------------------------------------------------------------------------------------------------------------------------------------------------------------------------------------------------------------------------------------------------------------------------------------------------------------------------------------------------------------------------------------------------------------------------------------------------------------------------------------------------------------------------------------------------------------------------------------------------------------------------------------------------------------------------------------------------------------------------------------------------------------------------------------------------------------------------------------------------------------------------------------------------------------------------------------------------------------------------------------|-------------------------------------------------------------------------------------------------------------------------------------------------------------------------------------------------------------------------------------------------------------------------------------------------------------------------------------------------------------------------------------------------------------------------------------------------------------------------------------------------------------------------------------------------------------------------------------------------------------------------------------------------------------------------------------------------------------------------------------------------------------------------------------------------------------------------------------------------------------------------------------------------------------------------------------------------------------------------------------------------------------------------------------------------------------------------------------------------------------------------------------------------------------------------------------------------------------------------------------------------------------------------------------------------------------------------------------------------------------------------------------------------------------------------------------------------------------------------------------------------------------------------------------------------------------------------------------------------------------------------------------------------------------------------------------------------------------------------------------------------------------------------------------------------------------------------------------------------------------------------------------------|
| H 3.895383 -1.425342 3.021572<br>H 3.466266 -2.621128 1.815929<br>H 0.441572 0.062665 3.307589<br>H 1.735948 0.773740 2.339111<br>H 2.087428 0.149872 3.949410<br>H -0.552778 -2.573523 -2.166757<br>H 0.187175 0.417194 -2.913168<br>H 4.954732 0.581815 -0.660542                                                                                                                                                                                                                                                                                                                                                                                                                                                                                                                                                                                                                                                                                                                                                                                                                                                                                                                                                                                                                                                                                                                                                                                                                                                                                                                                                                                                                                                                                                                                                                                                                                                                                                                                                              | H -0.055047 1.020750 3.648787<br>H 1.410908 0.815323 4.626353<br>H 0.229377 -0.497352 4.486276<br>H -1.028079 -3.235287 -0.824503<br>H 0.208225 -1.208610 -2.939309<br>H 4.945495 -0.666804 -0.674477                                                                                                                                                                                                                                                                                                                                                                                                                                                                                                                                                                                                                                                                                                                                                                                                                                                                                                                                                                                                                                                                                                                                                                                                                                                                                                                                                                                                                                                                                                                                                                                                                                                                                                                                                | H 2.282745 0.570957 4.724239<br>H -1.285975 -3.297189 -0.276862<br>H -0.015071 -1.791639 -2.576888<br>H 4.894767 -1.040446 -0.879047                                                                                                                                                                                                                                                                                                                                                                                                                                                                                                                                                                                                                                                                                                                                                                                                                                                                                                                                                                                                                                                                                                                                                                                                                                                                                                                                                                                                                                                                                                                                                                                                                                                                                                                                                      |
| <b>E'-QH<sub>2</sub>-GH<sup>2+</sup>R'</b><br>C -1.844722 -1.370217 1.538468<br>C -3.220238 -1.497226 1.608364<br>C -4.024219 -0.689998 0.792459<br>C -3.477982 0.225969 -0.110745<br>C -2.079183 0.351683 -0.204235<br>C -1.311590 -0.452123 0.641378<br>O -3.776902 -2.384678 2.477911<br>O -5.366527 -0.869196 0.975159<br>C -4.422903 1.102596 -0.905149<br>C -3.743873 1.927463 -2.003410<br>C -2.382231 2.467905 -1.553780<br>C -1.441910 1.294450 -1.213319<br>C -0.996313 0.526230 -2.471993<br>C -2.499611 3.449914 -0.382539<br>N 2.095249 -2.970710 -1.147516<br>C 3.326263 -2.455234 -0.922966<br>N 3.423957 -1.305312 -0.217624<br>C 2.279902 -0.710741 0.228273<br>C 1.026520 -1.215193 -0.000238<br>C 0.834211 -2.431305 -0.749637<br>N 2.154571 0.445276 0.952318<br>C 0.836652 0.634417 1.179992<br>N 0.133911 -0.342929 0.611670<br>O -0.194732 -2.986982 -1.046771<br>N 4.410057 -3.052037 -1.374410<br>C 4.716538 2.174322 -0.116226<br>C 3.293075 1.281678 1.501214<br>C 2.989534 2.786282 1.407381<br>C 4.253821 3.347094 0.732341<br>O 4.424194 1.012997 0.722384<br>H -1.206965 -1.969892 2.174081<br>H -4.740037 -2.330278 2.400585<br>H -4.932126 1.774445 -0.203194<br>H -5.206554 0.488831 -1.364193<br>H -4.400590 2.752561 -2.289920<br>H -3.613078 1.309408 -2.894668<br>H -1.934917 3.002219 -2.398068<br>H -0.544823 1.731907 -0.767328<br>H -0.553295 1.215648 -3.195037<br>H -1.836725 0.017983 -2.948078<br>H -0.249233 -0.232117 -2.234745<br>H -1.521774 3.872066 -0.135274<br>H -2.885964 2.965323 0.518244<br>H -3.171421 4.275018 -0.633802<br>H 2.025957 -3.834795 -1.676244<br>H 0.412317 1.445652 1.746794<br>H 5.328906 -2.668979 -1.202107<br>H 4.356932 -3.909601 -1.904766<br>H 5.784166 2.146498 -0.319138<br>H 4.157069 2.088990 -1.051652<br>H 3.459973 0.913000 2.511608<br>H 2.795955 3.213902 2.388934<br>H 2.117755 2.959715 0.775026<br>H 4.039529 4.233465 1.136514<br>H 5.011839 3.597834 1.475936<br>H -5.883606 -0.321606 0.372840<br>H 4.307781 -0.822126 -0.056681 | <b>Eq'-QH<sub>2</sub>-GH<sup>2+</sup>R'</b><br>C 1.960265 -1.430137 -1.492429<br>C 3.339876 -1.526024 -1.525370<br>C 4.111221 -0.643166 -0.754012<br>C 3.518671 0.330779 0.050467<br>C 2.119131 0.418566 0.114338<br>C 1.383183 -0.464894 -0.674353<br>O 3.935172 -2.463567 -2.311986<br>O 5.459377 -0.824059 -0.877123<br>C 4.380464 1.302745 0.821187<br>C 3.645840 2.555720 1.208832<br>C 2.318170 2.627788 1.296449<br>C 1.462886 1.398238 1.066515<br>C 1.153945 0.709628 2.417992<br>C 1.586159 3.884198 1.672417<br>N -1.929512 -2.899679 1.379553<br>C -3.178007 -2.443309 1.124138<br>N -3.316818 -1.374935 0.305730<br>C -2.194873 -0.796202 -0.211822<br>C -0.924800 -1.238553 0.049441<br>C -0.689458 -2.370899 0.909403<br>N -2.111616 0.289087 -1.044000<br>C -0.802351 0.495512 -1.303376<br>N -0.064796 -0.403048 -0.653640<br>O 0.358322 -2.868994 1.241080<br>N -4.235052 -3.019200 1.658854<br>C -4.693415 2.046832 -0.088916<br>C -3.282547 1.040108 -1.649125<br>C 3.017105 2.553566 -1.707797<br>C -4.276234 3.147221 -1.050867<br>O -4.391688 0.820301 -0.825411<br>H 1.351727 -2.096463 -2.089097<br>H 4.894861 -2.385524 -2.214208<br>H 5.251036 1.585612 0.217589<br>H 4.788100 0.813376 1.717634<br>H 4.254132 3.428528 1.423833<br>H 0.512052 1.731987 0.643396<br>H 0.689290 1.414692 3.109875<br>H 2.075439 0.336442 2.869640<br>H 0.472591 -0.132739 2.289131<br>H 0.918382 4.197123 0.862067<br>H 2.277820 4.700991 1.885000<br>H 0.957676 3.728305 2.555446<br>H -1.828507 -3.708786 1.984538<br>H -0.407164 1.263149 -1.946866<br>H -5.170671 -2.695511 1.457100<br>H -4.142779 -3.806907 2.283915<br>H -5.755667 2.014881 0.139873<br>H -4.113115 2.058281 0.837459<br>H -3.457669 0.570539 -2.615135<br>H -2.863972 2.889034 -2.731334<br>H -2.131819 2.807536 -1.123581<br>H -4.066519 4.087360 -0.542243<br>H -5.057582 3.315957 -1.793348<br>H 5.955885 -0.227034 -0.305677<br>H -4.214555 -0.932174 0.108365 | <b>Eqn'-QH<sub>2</sub>-GH<sup>2+</sup>R'</b><br>C 1.856640 -1.525457 -1.259695<br>C 3.229519 -1.715945 -1.432560<br>C 4.109602 -0.807150 -0.877541<br>C 3.648276 0.296185 -0.113941<br>C 2.241753 0.457644 0.159768<br>C 1.391719 -0.481062 -0.495210<br>O 3.660648 -2.774625 -2.170882<br>O 5.426473 -1.038666 -1.155760<br>C 4.560162 1.257427 0.382534<br>C 4.115867 2.311121 1.132075<br>C 2.752466 2.446840 1.483204<br>C 1.819870 1.517369 1.035936<br>C 0.398419 1.640062 1.536770<br>C 2.362895 3.613416 2.359905<br>N -2.012920 -2.750559 1.600107<br>C -3.247638 -2.327855 1.241176<br>N -3.347039 -1.306431 0.358545<br>C -2.201734 -0.747405 -0.127152<br>C -0.946080 -1.171491 0.219348<br>C -0.751607 -2.235963 1.171667<br>N -2.077985 0.299219 -1.003547<br>C -0.757043 0.499386 -1.203721<br>N -0.053012 -0.361682 -0.471969<br>O 0.279102 -2.689956 1.603910<br>N -4.332030 -2.886854 1.736685<br>C -4.682516 2.103899 -0.269786<br>C -3.224412 0.998550 -1.711908<br>C -2.964396 2.505216 -1.876554<br>C -4.239013 3.139697 -1.289725<br>O -4.365076 0.833717 -0.920118<br>H 1.164894 -2.201937 -1.744342<br>H 4.628499 -2.765167 -2.185027<br>H 5.616366 1.187603 0.153683<br>H 4.823480 3.052393 1.484066<br>H 0.372676 2.212408 2.460705<br>H -0.044800 0.673281 1.764448<br>H -0.253412 2.162605 0.830365<br>H 2.066025 3.284400 3.360801<br>H 1.525398 4.176024 1.941071<br>H 3.204274 4.297267 2.474939<br>H -1.941691 -3.511211 2.269161<br>H -0.329212 1.231697 -1.866789<br>H -5.253902 -2.581055 1.458828<br>H -4.277980 -3.644081 2.402719<br>H -5.750169 2.087061 -0.066137<br>H -4.125570 2.174439 0.668552<br>H -3.357674 0.454549 -2.645199<br>H -2.794005 2.764057 -2.919353<br>H -2.092024 2.811261 -1.298694<br>H -4.040474 4.110658 -0.837745<br>H -5.001259 3.260292 -2.060825<br>H 6.011411 -0.604014 -0.524814<br>H -4.235593 -0.879045 0.096104 |
| <b>E'-QH<sub>2</sub>-AH<sup>2+</sup>R'</b><br>N 2.736330 -2.539079 1.134132<br>C 1.530489 -2.084596 1.307412<br>N 1.058190 -0.877894 0.874852                                                                                                                                                                                                                                                                                                                                                                                                                                                                                                                                                                                                                                                                                                                                                                                                                                                                                                                                                                                                                                                                                                                                                                                                                                                                                                                                                                                                                                                                                                                                                                                                                                                                                                                                                                                                                                                                                    | <b>Eq'-QH<sub>2</sub>-AH<sup>2+</sup>R'</b><br>N -2.900049 -2.601886 -0.571335<br>C -1.641486 -2.328787 -0.752836<br>N -1.068922 -1.091800 -0.661068                                                                                                                                                                                                                                                                                                                                                                                                                                                                                                                                                                                                                                                                                                                                                                                                                                                                                                                                                                                                                                                                                                                                                                                                                                                                                                                                                                                                                                                                                                                                                                                                                                                                                                                                                                                                 | <b>Eqn'-QH<sub>2</sub>-AH<sup>2+</sup>R'</b><br>N -3.099551 -2.475955 -0.371193<br>C -1.817539 -2.333941 -0.531593<br>N -1.132258 -1.153125 -0.490669                                                                                                                                                                                                                                                                                                                                                                                                                                                                                                                                                                                                                                                                                                                                                                                                                                                                                                                                                                                                                                                                                                                                                                                                                                                                                                                                                                                                                                                                                                                                                                                                                                                                                                                                     |

|                                                                                                                                                                                                                                                                                                                                                                                                                                                                                                                                                                                                                                                                                                                                                                                                                                                                                                                                                                                                                                                                                                                                                                                                                                                                                                                                                                                                                                                                                                                                                                                                                                                                                                                                                                                                                                                            |                                                                                                                                                                                                                                                                                                                                                                                                                                                                                                                                                                                                                                                                                                                                                                                                                                                                                                                                                                                                                                                                                                                                                                                                                                                                                                                                                                                                                                                                                                                                                                                                                                                                                                                                                                     |                                                                                                                                                                                                                                                                                                                                                                                                                                                                                                                                                                                                                                                                                                                                                                                                                                                                                                                                                                                                                                                                                                                                                                                                                                                                                                                                                                                                                                                                                                                                                                                                                                                                                                           |
|------------------------------------------------------------------------------------------------------------------------------------------------------------------------------------------------------------------------------------------------------------------------------------------------------------------------------------------------------------------------------------------------------------------------------------------------------------------------------------------------------------------------------------------------------------------------------------------------------------------------------------------------------------------------------------------------------------------------------------------------------------------------------------------------------------------------------------------------------------------------------------------------------------------------------------------------------------------------------------------------------------------------------------------------------------------------------------------------------------------------------------------------------------------------------------------------------------------------------------------------------------------------------------------------------------------------------------------------------------------------------------------------------------------------------------------------------------------------------------------------------------------------------------------------------------------------------------------------------------------------------------------------------------------------------------------------------------------------------------------------------------------------------------------------------------------------------------------------------------|---------------------------------------------------------------------------------------------------------------------------------------------------------------------------------------------------------------------------------------------------------------------------------------------------------------------------------------------------------------------------------------------------------------------------------------------------------------------------------------------------------------------------------------------------------------------------------------------------------------------------------------------------------------------------------------------------------------------------------------------------------------------------------------------------------------------------------------------------------------------------------------------------------------------------------------------------------------------------------------------------------------------------------------------------------------------------------------------------------------------------------------------------------------------------------------------------------------------------------------------------------------------------------------------------------------------------------------------------------------------------------------------------------------------------------------------------------------------------------------------------------------------------------------------------------------------------------------------------------------------------------------------------------------------------------------------------------------------------------------------------------------------|-----------------------------------------------------------------------------------------------------------------------------------------------------------------------------------------------------------------------------------------------------------------------------------------------------------------------------------------------------------------------------------------------------------------------------------------------------------------------------------------------------------------------------------------------------------------------------------------------------------------------------------------------------------------------------------------------------------------------------------------------------------------------------------------------------------------------------------------------------------------------------------------------------------------------------------------------------------------------------------------------------------------------------------------------------------------------------------------------------------------------------------------------------------------------------------------------------------------------------------------------------------------------------------------------------------------------------------------------------------------------------------------------------------------------------------------------------------------------------------------------------------------------------------------------------------------------------------------------------------------------------------------------------------------------------------------------------------|
| C 1.987108 -0.054885 0.310126<br>C 3.281729 -0.494708 0.072877<br>C 3.665187 -1.803837 0.468644<br>N 1.910660 1.267470 -0.080203<br>C 3.121860 1.615949 -0.547995<br>N 3.951167 0.584180 -0.478713<br>C 0.816009 4.215423 -1.233420<br>C 0.803201 2.311295 0.117297<br>C -0.334155 2.163919 -0.899350<br>C -0.574665 3.612247 -1.347609<br>O 1.392439 3.557823 -0.063381<br>H 3.374618 2.601084 -0.897727<br>H 0.835804 5.283151 -1.027970<br>H 1.434969 3.999024 -2.108669<br>H 0.502036 2.191987 1.154337<br>H -1.209506 1.701403 -0.452890<br>H -0.002523 1.551226 -1.735943<br>H -0.974392 3.668982 -2.359575<br>H -1.264895 4.116821 -0.669068<br>N 4.847843 -2.352062 0.264845<br>H 5.600083 -1.897560 -0.230229<br>H 5.009237 -3.287837 0.613315<br>C -0.731802 0.168573 2.129523<br>C -2.062151 0.516741 2.281206<br>C -0.358247 -0.561357 1.005381<br>C -2.986841 0.114993 1.306766<br>O -2.454560 1.242402 3.360310<br>C -1.259004 -1.010163 0.031024<br>C -2.610678 -0.651657 0.199589<br>O -4.261887 0.537902 1.539298<br>H -3.409301 1.392102 3.304448<br>C -0.827290 -1.869256 -1.151363<br>C -3.677877 -1.002227 -0.815952<br>C -1.789059 -1.718299 -2.352025<br>C -0.712210 -3.355388 -0.750150<br>H 0.162116 -1.537976 -1.481633<br>C -3.226326 -1.991022 -1.895464<br>H -4.014971 -0.070964 -1.287611<br>H -4.552739 -1.419582 -0.304497<br>C -1.659884 -0.368683 -3.062908<br>H -1.510028 -2.495462 -3.069999<br>H -0.526210 -3.964558 -1.637829<br>H -1.626004 -3.711450 -0.271987<br>H 0.108678 -3.537827 -0.058217<br>H -3.909506 -1.928447 -2.745849<br>H -3.301213 -3.010120 -1.510460<br>H -0.626699 -0.187108 -3.370963<br>H -1.972949 0.463232 -2.430094<br>H -2.285809 -0.352815 -3.958996<br>H 0.805734 -2.685365 1.840213<br>H -0.004151 0.463103 2.874292<br>H -4.871702 0.225465 0.860445<br>H 4.919699 0.627782 -0.772715 | C -1.921738 -0.066569 -0.383943<br>C -3.272074 -0.297747 -0.172158<br>C -3.785465 -1.617533 -0.265248<br>N -1.702697 1.290730 -0.272126<br>C -2.887469 1.867834 -0.002669<br>N -3.835078 0.942978 0.068288<br>C -0.332733 4.391886 0.068611<br>C -0.429425 2.107281 -0.438407<br>C 0.340715 2.264381 0.879335<br>C 0.822566 3.717553 0.794236<br>O -0.822326 3.377980 -0.862287<br>H -3.035567 2.926661 0.116166<br>H -0.049673 5.254734 -0.530370<br>H -1.142007 4.669553 0.749472<br>H 0.126337 1.601609 -1.223038<br>H 1.148361 1.543985 0.968242<br>H -0.339435 2.132986 1.723018<br>H 1.008281 4.150063 1.776780<br>H 1.737697 3.785947 0.202749<br>N -5.048099 -1.954398 -0.086194<br>H -5.773698 -1.288453 0.132156<br>H -5.308971 -2.926843 -0.182513<br>C 0.781656 -0.727140 -2.192698<br>C 2.133802 -0.558630 -2.432711<br>C 0.359990 -0.926407 -0.880155<br>C 3.033755 -0.579750 -1.353806<br>O 2.576268 -0.363464 -3.701786<br>C 1.229972 -0.981011 0.206963<br>C 2.596754 -0.777854 -0.044229<br>O 4.334736 -0.382111 -1.709876<br>H 3.540212 -0.276022 -3.685769<br>C 0.759193 -1.279331 1.616662<br>C 3.577771 -0.722678 1.103149<br>C 1.626571 -0.591440 2.653633<br>C 0.748435 -2.804996 1.876847<br>H -0.266088 -0.920303 1.741248<br>C 2.918547 -0.375259 2.410088<br>H 4.350414 0.026040 0.895740<br>H 4.108651 -1.681412 1.190446<br>C 0.959212 -0.231202 3.948774<br>H 0.448447 -3.011721 2.905875<br>H 1.744103 -3.222695 1.715812<br>H 0.050598 -3.321310 1.215203<br>H 3.549981 0.072601 3.170382<br>H 0.158143 0.496851 3.779674<br>H 1.669297 0.195719 4.658635<br>H 0.494197 -1.107675 4.411914<br>H -0.953800 -3.125427 -1.005591<br>H 0.074376 -0.697482 -3.010955<br>H 4.933039 -0.480972 -0.960056<br>H -4.809690 1.149353 0.256816 | C -1.890034 -0.035882 -0.312455<br>C -3.261803 -0.125181 -0.126948<br>C -3.894654 -1.396550 -0.145041<br>N -1.545479 1.007733 -0.292355<br>C -2.677969 2.001626 -0.104330<br>N -3.710493 1.177932 0.004327<br>C -0.019396 4.319041 -0.247080<br>C -0.201050 1.997641 -0.491101<br>C 0.519916 2.273219 0.838321<br>C 1.055083 3.696006 0.630509<br>O -0.475052 3.223130 -1.097378<br>H -2.733240 3.075217 -0.066763<br>H 0.335729 5.102309 -0.913030<br>H -0.864404 4.694486 0.337200<br>H 0.344698 1.355424 -1.175398<br>H 1.301157 1.544829 1.031420<br>H -0.192676 2.238337 1.664269<br>H 1.187141 4.229324 1.571300<br>H 2.010945 3.673197 0.103696<br>N -5.183969 -1.610416 0.030100<br>H -5.853261 -0.876661 0.207498<br>H -5.524537 -2.561987 -0.010853<br>C 0.662046 -1.126064 -2.055740<br>C 2.003188 -0.998046 -2.424930<br>C 0.302281 -1.119521 -0.726047<br>C 2.954603 -0.804053 -1.440063<br>O 2.330063 -1.030006 -3.743103<br>C 1.238780 -1.010681 0.344054<br>C 2.601257 -0.777293 -0.065729<br>O 4.222880 -0.615660 -1.900410<br>H 3.289932 -0.935427 -3.826734<br>C 0.932308 -1.080555 1.748364<br>C 3.576369 -0.499864 0.921209<br>C 1.922667 -0.785119 2.678139<br>C -0.427008 -1.506303 2.256551<br>C 3.234225 -0.477890 2.244491<br>H 4.598567 -0.274899 0.643611<br>C 1.658636 -0.780754 4.165353<br>H -0.384888 -1.722204 3.319780<br>H -0.768496 -2.419823 1.770812<br>H -1.196938 -0.741252 2.129465<br>H 3.986842 -0.237219 2.985612<br>H 0.810322 -0.143313 4.425020<br>H 2.532615 -0.411506 4.702154<br>H 1.440465 -1.785131 4.540310<br>H -1.201432 -3.206153 -0.709727<br>H -0.092761 -1.201240 -2.827935<br>H 4.885787 -0.761156 -1.215896<br>H -4.663893 1.491947 0.144244 |
| <b>E'-QH2-GH2+R' (TS)</b><br>C -1.705008 -1.134344 1.763892<br>C -3.080417 -1.139357 1.914164<br>C -3.873081 -0.457220 0.983072<br>C -3.316556 0.209091 -0.111897<br>C -1.920030 0.198619 -0.286777<br>C -1.154533 -0.468790 0.674092<br>O -3.647635 -1.785372 2.972729<br>O -5.214757 -0.489223 1.253978<br>C -4.241348 0.983190 -1.027973<br>C -3.570900 1.518071 -2.298189<br>C -2.147030 2.016648 -2.028464<br>C -1.280026 0.857353 -1.498972<br>C -0.979417 -0.186960 -2.591196<br>C -2.118587 3.217610 -1.076034<br>N 2.025488 -3.477625 -0.746033<br>C 3.284060 -2.987004 -0.698841<br>N 3.468955 -1.732198 -0.242557                                                                                                                                                                                                                                                                                                                                                                                                                                                                                                                                                                                                                                                                                                                                                                                                                                                                                                                                                                                                                                                                                                                                                                                                                               | <b>Eq'-QH2-GH2+R' (TS)</b><br>C 1.998397 1.116230 1.745052<br>C 3.367045 1.142320 1.948515<br>C 4.198535 0.351582 1.143250<br>C 3.676082 -0.461459 0.137064<br>C 2.291898 -0.469076 -0.096783<br>C 1.485732 0.317583 0.727442<br>O 3.892958 1.924218 2.933867<br>O 5.530270 0.443343 1.446993<br>C 4.593245 -1.351259 -0.669037<br>C 3.870792 -2.497517 -1.320899<br>C 2.560927 -2.490837 -1.566939<br>C 1.724030 -1.267143 -1.253318<br>C 1.603553 -0.378250 -2.515067<br>C 1.841334 -3.642570 -2.208857<br>N -1.530831 3.058351 -1.402871<br>C -2.805656 2.616166 -1.320131<br>N -3.049551 1.483824 -0.632653                                                                                                                                                                                                                                                                                                                                                                                                                                                                                                                                                                                                                                                                                                                                                                                                                                                                                                                                                                                                                                                                                                                                                     | <b>Eqn'-QH2-GH2+R' (TS)</b><br>C -1.527806 -1.168232 -1.807066<br>C -2.860675 -1.526891 -2.036797<br>C -3.814184 -1.209302 -1.092601<br>C -3.462405 -0.565465 0.122923<br>C -2.081676 -0.286419 0.425859<br>C -1.156512 -0.572961 -0.623898<br>O -3.185426 -2.144919 -3.206980<br>O -5.101226 -1.523786 -1.437527<br>C -4.462600 -0.182139 1.046947<br>C -4.121031 0.428269 2.222746<br>C -2.769768 0.639906 2.580255<br>C -1.749641 0.257230 1.714817<br>C -0.323024 0.385775 2.201111<br>C -2.485293 1.270230 3.923368<br>N 1.067907 3.418462 -0.952121<br>C 2.412839 3.291745 -0.898382<br>N 2.936508 2.059795 -0.739320                                                                                                                                                                                                                                                                                                                                                                                                                                                                                                                                                                                                                                                                                                                                                                                                                                                                                                                                                                                                                                                                               |

|                                                                                                                                                                                                                                                                                                                                                                                                                                                                                                                                                                                                                                                                                                                                                                                                                                                                                                                                                                                                                                                                                                                                                                                                                                                                                                                                                                                   |                                                                                                                                                                                                                                                                                                                                                                                                                                                                                                                                                                                                                                                                                                                                                                                                                                                                                                                                                                                                                                                                                                                                                                                                                                                                                                                                  |                                                                                                                                                                                                                                                                                                                                                                                                                                                                                                                                                                                                                                                                                                                                                                                                                                                                                                                                                                                                                                                                                                                                                                                                                                                |
|-----------------------------------------------------------------------------------------------------------------------------------------------------------------------------------------------------------------------------------------------------------------------------------------------------------------------------------------------------------------------------------------------------------------------------------------------------------------------------------------------------------------------------------------------------------------------------------------------------------------------------------------------------------------------------------------------------------------------------------------------------------------------------------------------------------------------------------------------------------------------------------------------------------------------------------------------------------------------------------------------------------------------------------------------------------------------------------------------------------------------------------------------------------------------------------------------------------------------------------------------------------------------------------------------------------------------------------------------------------------------------------|----------------------------------------------------------------------------------------------------------------------------------------------------------------------------------------------------------------------------------------------------------------------------------------------------------------------------------------------------------------------------------------------------------------------------------------------------------------------------------------------------------------------------------------------------------------------------------------------------------------------------------------------------------------------------------------------------------------------------------------------------------------------------------------------------------------------------------------------------------------------------------------------------------------------------------------------------------------------------------------------------------------------------------------------------------------------------------------------------------------------------------------------------------------------------------------------------------------------------------------------------------------------------------------------------------------------------------|------------------------------------------------------------------------------------------------------------------------------------------------------------------------------------------------------------------------------------------------------------------------------------------------------------------------------------------------------------------------------------------------------------------------------------------------------------------------------------------------------------------------------------------------------------------------------------------------------------------------------------------------------------------------------------------------------------------------------------------------------------------------------------------------------------------------------------------------------------------------------------------------------------------------------------------------------------------------------------------------------------------------------------------------------------------------------------------------------------------------------------------------------------------------------------------------------------------------------------------------|
| C 2.380136 -0.983956 0.152324<br>C 1.097775 -1.492117 0.095065<br>C 0.813312 -2.812740 -0.376545<br>N 2.387251 0.284431 0.629640<br>C 1.101433 0.558035 0.870212<br>N 0.283857 -0.470670 0.561638<br>O -0.249146 -3.383650 -0.495357<br>N 4.311604 -3.721537 -1.092008<br>C 2.849116 3.944898 0.073112<br>C 4.045366 2.051858 0.516882<br>C 3.850577 2.649224 1.851489<br>C 2.794737 3.742901 1.588169<br>O 3.594307 2.743606 -0.440074<br>H -1.074887 -1.637848 2.485022<br>H -4.607436 -1.673819 2.921659<br>H -4.661850 1.819442 -0.455713<br>H -5.091514 0.356167 -1.320628<br>H -4.180779 2.324596 -2.713037<br>H -3.541426 0.729740 -3.053932<br>H -1.713421 2.333290 -2.982736<br>H -0.323085 1.289641 -1.196378<br>H -0.538686 0.299449 -3.465438<br>H -1.885256 -0.708423 -2.906251<br>H -0.274796 -0.940158 -2.236804<br>H -1.097915 3.592352 -0.960024<br>H -2.487876 2.955908 -0.080714<br>H -2.737450 4.033219 -1.459852<br>H 1.891371 -4.423444 -1.086977<br>H 0.719135 1.484537 1.264891<br>H 5.255332 -3.364922 -1.063467<br>H 4.184693 -4.661882 -1.435687<br>H 3.448404 4.791937 -0.251102<br>H 1.892146 3.931716 -0.439590<br>H 4.709956 1.239040 0.264613<br>H 4.828222 3.066233 2.131761<br>H 3.591847 1.909718 2.606136<br>H 1.806963 3.414080 1.905678<br>H 3.028610 4.665041 2.115118<br>H -5.724830 -0.043666 0.567668<br>H 4.404813 -1.351685 -0.184684 | C -2.003644 0.798927 -0.050585<br>C -0.703453 1.254925 -0.149201<br>C -0.358268 2.453588 -0.847760<br>N -2.076616 -0.351650 0.658506<br>C -0.811385 -0.608161 1.000677<br>N 0.056222 0.320957 0.539438<br>O 0.725470 2.971140 -1.017379<br>N -3.790601 3.280997 -1.903229<br>C -5.843367 -1.219433 1.605832<br>C -3.774121 -2.163234 1.418205<br>C -4.396649 -2.515959 0.133890<br>C -5.811987 -1.898708 0.231598<br>O -4.511765 -1.542514 2.225416<br>H 1.343586 1.714433 2.364741<br>H 4.855452 1.824824 2.924200<br>H 5.377975 -1.759578 -0.021118<br>H 5.119153 -0.757775 -1.431428<br>H 4.472599 -3.358301 -1.595374<br>H 0.717889 -1.605372 -0.992962<br>H 1.203041 -0.952606 -3.352963<br>H 2.584938 0.008336 -2.798759<br>H 0.940986 0.469912 -2.339580<br>H 1.071926 -4.038361 -1.536624<br>H 2.528005 -4.452069 -2.462315<br>H 1.327965 -3.329188 -3.123967<br>H -1.351458 3.913133 -1.918619<br>H -0.478164 -1.455482 1.578462<br>H -4.743634 2.951121 -1.865740<br>H -3.615090 4.124485 -2.428422<br>H -6.572646 -1.616992 2.305333<br>H -5.882564 -0.133681 1.589304<br>H -2.815941 -2.499932 1.789782<br>H -4.393918 -3.608927 0.052653<br>H -3.785085 -2.144477 -0.690174<br>H -5.982030 -1.175848 -0.562743<br>H -6.575529 -2.670201 0.165199<br>H 6.075277 -0.031666 0.809655<br>H -3.996781 1.141073 -0.541732 | C 2.097073 0.970363 -0.636766<br>C 0.725445 1.111901 -0.696418<br>C 0.087168 2.379435 -0.871199<br>N 2.455954 -0.326543 -0.479328<br>C 1.296527 -0.989388 -0.443637<br>N 0.225579 -0.173169 -0.557993<br>O -1.091172 2.653287 -0.944567<br>N 3.195415 4.353451 -1.003616<br>C 3.946480 -3.032015 1.773278<br>C 4.599630 -1.388969 0.330484<br>C 4.586081 -2.592833 -0.517587<br>C 3.869901 -3.633453 0.369304<br>O 4.321011 -1.591356 1.543108<br>H -0.793022 -1.342611 -2.582341<br>H -4.136139 -2.326820 -3.201437<br>H -5.510619 -0.340662 0.824174<br>H -4.899695 0.740576 2.908850<br>H 0.292468 -0.454563 1.889505<br>H 0.157915 1.305813 1.857157<br>H -2.032891 0.555523 4.618258<br>H -3.410256 1.628307 4.376547<br>H -1.800638 2.117447 3.838992<br>H 0.676056 4.346852 -1.066738<br>H 1.184438 -2.053951 -0.324363<br>H 4.199888 4.276944 -0.943611<br>H 2.809945 5.280028 -1.110716<br>H 4.750032 -3.420967 2.393558<br>H 3.012315 -2.999011 2.325222<br>H 4.991619 -0.415217 0.072937<br>H 5.641954 -2.841363 -0.696864<br>H 4.136573 -2.405975 -1.491035<br>H 2.836167 -3.766616 0.055852<br>H 4.362648 -4.602208 0.331583<br>H -5.666947 -1.614103 -0.662360<br>H 3.940870 1.935273 -0.727296<br>H -0.296914 0.406821 3.288045 |
| <b>E'-QH2-AH2+R' (TS)</b><br>N 2.913540 -2.466138 1.068420<br>C 1.675659 -2.105342 1.259178<br>N 1.123954 -0.922185 0.873416<br>C 1.980842 -0.012104 0.322990<br>C 3.308937 -0.351125 0.084980<br>C 3.784713 -1.636811 0.434661<br>N 1.757969 1.284898 -0.049853<br>C 2.929309 1.734888 -0.503577<br>N 3.876460 0.789248 -0.453541<br>C 0.453094 4.264464 -1.276963<br>C 0.420600 2.711791 0.417906<br>C -0.779976 2.410208 -0.410349<br>C -0.443619 3.118174 -1.731963<br>O 1.015712 3.798846 0.028553<br>H 3.111300 2.739923 -0.846400<br>H -0.086144 5.179685 -1.040460<br>H 1.300961 4.480547 -1.920494<br>H 0.515886 2.480255 1.469180<br>H -1.624481 2.886054 0.102905<br>H -0.993248 1.351556 -0.493165<br>H 0.093435 2.443368 -2.398410<br>H -1.331381 3.481649 -2.245336<br>N 5.008721 -2.087411 0.207895<br>H 5.715087 -1.551551 -0.272139<br>H 5.245538 -3.021457 0.512869<br>C -0.711741 -0.004519 2.162970<br>C -2.057485 0.284024 2.315213<br>C -0.300514 -0.676734 1.017317<br>C -2.957094 -0.104145 1.313145<br>O -2.487096 0.948175 3.420331                                                                                                                                                                                                                                                                                                                     | <b>Eq'-QH2-AH2+R' (TS)</b><br>N -3.032666 -2.564719 -0.437413<br>C -1.755320 -2.381204 -0.622300<br>N -1.119213 -1.178643 -0.611525<br>C -1.906944 -0.082899 -0.409436<br>C -3.274191 -0.221372 -0.196659<br>C -3.860162 -1.509443 -0.209560<br>N -1.560505 1.237496 -0.390233<br>C -2.695645 1.902886 -0.176765<br>N -3.740488 1.072429 -0.046002<br>C -0.173220 4.452642 -0.184971<br>C 0.098061 2.288408 -0.913858<br>C 0.893924 2.379386 0.345264<br>C 0.312071 3.637434 1.009227<br>O -0.383018 3.439620 -1.265940<br>H -2.786814 2.975018 -0.128958<br>H 0.573905 5.136475 -0.583003<br>H -1.120998 4.966981 -0.053216<br>H 0.295875 1.594419 -1.718401<br>H 1.932855 2.529771 0.026113<br>H 0.868857 1.484041 0.954014<br>H -0.513694 3.373132 1.670396<br>H 1.056409 4.180175 1.587991<br>N -5.145792 -1.767258 -0.026497<br>H -5.836055 -1.051088 0.138330<br>H -5.456922 -2.728055 -0.064025<br>C 0.782982 -1.014383 -2.115831<br>C 2.146904 -0.895472 -2.325392<br>C 0.314887 -1.074123 -0.805731<br>C 3.010314 -0.812694 -1.221171<br>O 2.634504 -0.844682 -3.592750                                                                                                                                                                                                                                                 | <b>Eqn'-QH2-AH2+R' (TS)</b><br>N -3.202234 -2.435313 -0.198258<br>C -1.912360 -2.353976 -0.361067<br>N -1.191878 -1.200302 -0.403465<br>C -1.906815 -0.040746 -0.321933<br>C -3.287957 -0.068758 -0.156315<br>C -3.960152 -1.312374 -0.068927<br>N -1.472111 1.251773 -0.405738<br>C -2.566826 2.006873 -0.309175<br>N -3.669163 1.261028 -0.150496<br>C 0.178544 4.368288 -0.409537<br>C 0.286731 2.114875 -0.863655<br>C 0.974260 2.284830 0.452177<br>C 0.468142 3.662106 0.910019<br>O -0.051692 3.256769 -1.382207<br>H -2.590705 3.081848 -0.367660<br>H 1.029841 4.917599 -0.807319<br>H -0.711225 4.990958 -0.429510<br>H 0.504683 1.329719 -1.573086<br>H 2.047552 2.297919 0.227208<br>H 0.794279 1.475663 1.151238<br>H -0.436302 3.557313 1.510126<br>H 1.209988 4.199462 1.497158<br>N -5.259740 -1.473803 0.121298<br>H -5.902885 -0.707547 0.247698<br>H -5.628019 -2.414328 0.159432<br>C 0.598985 -1.291764 -1.966674<br>C 1.942121 -1.209549 -2.345137<br>C 0.239578 -1.201603 -0.639907<br>C 2.899335 -0.974000 -1.376020<br>O 2.265387 -1.331142 -3.659274                                                                                                                                                                 |

|                                                                                                                                                                                                                                                                                                                                                                                                                                                                                                                                                                                                                                                                                                                                                                                                                                                                                                                                                                                                                                                                                                                                                                                                                                                                                                                                                                                                                                                                                                                     |                                                                                                                                                                                                                                                                                                                                                                                                                                                                                                                                                                                                                                                                                                                                                                                                                                                                                                                                                                                                                                                                                                                                                                                                                                                                                                                                                                                                                                                   |                                                                                                                                                                                                                                                                                                                                                                                                                                                                                                                                                                                                                                                                                                                                                                                                                                                                                                                                                                                                                                                                                                                                                                                                                                                                                                                                                                             |
|---------------------------------------------------------------------------------------------------------------------------------------------------------------------------------------------------------------------------------------------------------------------------------------------------------------------------------------------------------------------------------------------------------------------------------------------------------------------------------------------------------------------------------------------------------------------------------------------------------------------------------------------------------------------------------------------------------------------------------------------------------------------------------------------------------------------------------------------------------------------------------------------------------------------------------------------------------------------------------------------------------------------------------------------------------------------------------------------------------------------------------------------------------------------------------------------------------------------------------------------------------------------------------------------------------------------------------------------------------------------------------------------------------------------------------------------------------------------------------------------------------------------|---------------------------------------------------------------------------------------------------------------------------------------------------------------------------------------------------------------------------------------------------------------------------------------------------------------------------------------------------------------------------------------------------------------------------------------------------------------------------------------------------------------------------------------------------------------------------------------------------------------------------------------------------------------------------------------------------------------------------------------------------------------------------------------------------------------------------------------------------------------------------------------------------------------------------------------------------------------------------------------------------------------------------------------------------------------------------------------------------------------------------------------------------------------------------------------------------------------------------------------------------------------------------------------------------------------------------------------------------------------------------------------------------------------------------------------------------|-----------------------------------------------------------------------------------------------------------------------------------------------------------------------------------------------------------------------------------------------------------------------------------------------------------------------------------------------------------------------------------------------------------------------------------------------------------------------------------------------------------------------------------------------------------------------------------------------------------------------------------------------------------------------------------------------------------------------------------------------------------------------------------------------------------------------------------------------------------------------------------------------------------------------------------------------------------------------------------------------------------------------------------------------------------------------------------------------------------------------------------------------------------------------------------------------------------------------------------------------------------------------------------------------------------------------------------------------------------------------------|
| C -1.174686 -1.100319 0.009254<br>C -2.539859 -0.795161 0.171364<br>O -4.249743 0.265083 1.548071<br>C -0.688059 -1.864070 -1.214199<br>C -3.573008 -1.110772 -0.889854<br>C -1.618494 -1.642432 -2.426591<br>C -0.540754 -3.369353 -0.912217<br>H 0.299976 -1.481900 -1.488940<br>C -3.060622 -1.988043 -2.038347<br>H -3.943728 -0.159623 -1.291651<br>H -4.437093 -1.605443 -0.431653<br>C -1.499435 -0.232437 -3.011950<br>H -1.298289 -2.348708 -3.198779<br>H -1.468799 -3.789905 -0.521576<br>H 0.239398 -3.568670 -0.178397<br>H -0.274938 -3.907031 -1.825642<br>H -3.721478 -1.868579 -2.900253<br>H -3.116994 -3.038797 -1.746818<br>H -0.458734 0.005439 -3.247253<br>H -1.870546 0.530675 -2.325469<br>H -2.082294 -0.150920 -3.933015<br>H 0.998462 -2.779771 1.766051<br>H -0.001843 0.286684 2.926051<br>H -4.843229 -0.050153 0.856239<br>H -3.445823 1.066618 3.358414<br>H 4.836668 0.923239 -0.743668                                                                                                                                                                                                                                                                                                                                                                                                                                                                                                                                                                                           | C 1.150167 -1.018394 0.308707<br>C 2.526838 -0.857633 0.086755<br>O 4.326927 -0.669512 -1.550527<br>C 0.620279 -1.151965 1.722753<br>C 3.468913 -0.674597 1.253413<br>C 1.465433 -0.377099 2.715455<br>C 0.551575 -2.640691 2.139516<br>H -0.397318 -0.753707 1.765920<br>C 2.767876 -0.199410 2.496594<br>H 4.241936 0.057386 0.991923<br>H 4.004605 -1.612726 1.457982<br>C 0.759725 0.123113 3.942724<br>H 0.194372 -2.732313 3.167041<br>H 1.541521 -3.096550 2.074526<br>H -0.127151 -3.204370 1.496694<br>H 3.378136 0.316163 3.231043<br>H -0.016669 0.847039 3.670469<br>H 1.453186 0.604429 4.634013<br>H 0.256998 -0.693050 4.471764<br>H -1.116764 -3.235824 -0.805470<br>H 0.103397 -1.060652 -2.956776<br>H 4.899788 -0.728084 -0.777194<br>H 3.599100 -0.773993 -3.551978<br>H -4.692013 1.371900 0.123820                                                                                                                                                                                                                                                                                                                                                                                                                                                                                                                                                                                                                          | C 1.181556 -1.027942 0.417216<br>C 2.547702 -0.847858 -0.006771<br>O 4.171541 -0.839590 -1.847554<br>C 0.874831 -0.983048 1.823476<br>C 3.529765 -0.520190 0.957698<br>C 1.873450 -0.642934 2.729862<br>C -0.494848 -1.330496 2.362054<br>C 3.191026 -0.397433 2.275903<br>C 1.611668 -0.525373 4.212907<br>H -1.241947 -0.558396 2.162772<br>H -0.459557 -1.453404 3.440233<br>H -0.858367 -2.273485 1.955339<br>H 0.781233 0.151431 4.426746<br>H 2.496179 -0.142830 4.722369<br>H 1.367013 -1.494475 4.657755<br>H -1.330819 -3.261404 -0.464382<br>H -0.157429 -1.409396 -2.732137<br>H 4.831525 -0.978485 -1.158807<br>H 3.226735 -1.259234 -3.748966<br>H -4.604602 1.638249 -0.065260<br>H 4.554783 -0.332793 0.662909<br>H 3.949619 -0.119920 2.997862                                                                                                                                                                                                                                                                                                                                                                                                                                                                                                                                                                                                              |
| <b>E'-QH-G</b><br>C -0.470210 1.604562 -1.942918<br>C -0.956882 1.640812 -0.479823<br>H -0.071866 2.580804 -2.236296<br>H -1.287543 1.356086 -2.624552<br>H 0.313988 0.856409 -2.073764<br>C -1.409693 0.256707 -0.054694<br>C -2.049367 2.736868 -0.275107<br>H -0.094701 1.924473 0.127822<br>C -3.484796 2.171871 -0.229672<br>C -2.701767 -0.167173 -0.415727<br>H -1.984567 3.406606 -1.139928<br>C -0.559453 -0.632006 0.603916<br>C -1.762703 3.566545 0.980192<br>C -3.640822 0.855830 -1.000905<br>H -3.756208 1.975129 0.814559<br>C -0.959491 -1.945245 0.899746<br>H -4.184803 2.928450 -0.598378<br>C -3.146588 -1.485148 -0.146008<br>H -1.743268 2.921848 1.865628<br>H -2.533839 4.327142 1.137632<br>H -0.795762 4.073561 0.910925<br>N 0.759971 -0.215437 1.000215<br>C -2.219475 -2.351309 0.522368<br>H -3.447826 1.021883 -2.069319<br>H -4.664153 0.483061 -0.926616<br>H -0.284120 -2.620933 1.412296<br>O -4.315140 -1.976251 -0.433464<br>C 1.952268 -0.319147 0.294159<br>C 1.070226 0.441841 2.147249<br>H 0.308836 0.664538 2.879220<br>O -2.697055 -3.613736 0.775307<br>C 2.284840 -0.901419 -0.960954<br>C 2.922601 0.297862 1.090807<br>N 2.353699 0.767949 2.246184<br>H -3.604167 -3.556508 0.398479<br>N 4.239436 0.421814 0.764808<br>O 1.575175 -1.485663 -1.779044<br>N 3.663305 -0.730199 -1.217233<br>C 4.566486 -0.103902 -0.389375<br>H 3.986213 -1.138802 -2.085837<br>N 5.868885 -0.098257 -0.803566<br>H 6.470789 0.531744 -0.293791<br>H 6.061050 -0.156683 -1.792838 | <b>Eq'-QH-G</b><br>C -0.432661 1.880575 -1.520913<br>C -1.113814 1.714050 -0.140817<br>H -0.161660 2.924289 -1.700636<br>H -1.112190 1.560087 -2.314653<br>H 0.474057 1.277384 -1.583333<br>C -1.489466 0.261605 0.097120<br>C -2.309265 2.641234 -0.046976<br>H -0.387037 2.023450 0.615891<br>C -3.531965 2.202463 -0.352592<br>C -2.771101 -0.191821 -0.255421<br>C -0.563084 -0.651009 0.609746<br>C -2.022568 4.063171 0.348206<br>C -3.821577 0.778809 -0.734773<br>C -0.879025 -2.009006 0.766519<br>H -4.372256 2.892368 -0.330323<br>C -3.127704 -1.559306 -0.129622<br>H -1.598154 4.106511 1.357955<br>H -2.926697 4.675323 0.328917<br>H -1.285245 4.521819 -0.319827<br>N 0.753076 -0.216256 0.997212<br>C -2.131159 -2.442788 0.395351<br>H -3.941864 0.704192 -1.827735<br>H -4.792808 0.470662 -0.333582<br>H -0.144277 -2.697687 1.167852<br>O -4.279867 -2.073332 -0.436473<br>C 1.939488 -0.294499 0.277003<br>C 1.078635 0.380699 2.173179<br>H 0.327547 0.563628 2.926637<br>O -2.528181 -3.751713 0.514499<br>C 2.256272 -0.812262 -1.010193<br>C 2.919924 0.280051 1.092350<br>N 2.363685 0.698667 2.273665<br>H -3.452469 -3.706553 0.181779<br>N 4.234300 0.412782 0.760604<br>O 1.533631 -1.342923 -1.852910<br>N 3.634383 -0.641398 -1.268262<br>C 4.548680 -0.061126 -0.419404<br>H 3.946579 -1.007292 -2.159497<br>N 5.847716 -0.045470 -0.842935<br>H 6.458709 0.555853 -0.309939<br>H 6.033331 -0.063590 -1.834985 | <b>Eqn'-QH-G</b><br>C 0.132065 2.186958 1.037368<br>C -1.176751 1.732060 0.428121<br>H 0.122635 3.257145 1.226239<br>H 0.987980 1.982252 0.389858<br>H 0.323722 1.695242 1.991297<br>C -1.500994 0.331083 0.280739<br>C -2.092090 2.702698 0.033254<br>C -3.360610 2.326270 -0.474290<br>C -2.815078 -0.017411 -0.209543<br>C -0.634663 -0.760496 0.577438<br>C -1.796277 4.184450 0.134905<br>C -3.714581 1.007217 -0.574987<br>C -1.050719 -2.082597 0.436501<br>H -4.058129 3.102180 -0.771571<br>C -3.256542 -1.387657 -0.350538<br>H -1.680182 4.511067 1.173169<br>H -2.614290 4.761233 -0.299689<br>H -0.879244 4.459201 -0.393408<br>N 0.740957 -0.600673 0.968459<br>C -2.327511 -2.389992 0.004859<br>H -4.690063 0.714768 -0.943174<br>H -0.349196 -2.880018 0.656185<br>O -4.420929 -1.744574 -0.775165<br>C 1.844699 -0.400367 0.149650<br>C 1.238118 -0.741381 2.224132<br>H 0.581884 -0.918722 3.062558<br>O -2.756334 -3.690792 -0.129730<br>C 1.980435 -0.189780 -1.250798<br>C 2.957068 -0.412966 0.996412<br>N 2.559294 -0.629810 2.291142<br>H -3.668767 -3.574767 -0.465232<br>N 4.245757 -0.228230 0.597246<br>O 1.124005 -0.139455 -2.132668<br>N 3.344230 -0.021980 -1.578760<br>C 4.395685 -0.041925 -0.691065<br>H 3.528148 0.107418 -2.566217<br>N 5.646728 0.089150 -1.223931<br>H 6.376027 0.269589 -0.549752<br>H 5.753256 0.575807 -2.101782 |



|                                                                                                                                                                                                                                                                                                                                                                                                                                                                                                                                                                                                                                                                                                                                                                                                                                                                                                                                                                                                                                                                                                                                                                                                                                                                                                                                                                                                                                                                                  |                                                                                                                                                                                                                                                                                                                                                                                                                                                                                                                                                                                                                                                                                                                                                                                                                                                                                                                                                                                                                                                                                                                                                                                                                                                                                                                                                                                                                |                                                                                                                                                                                                                                                                                                                                                                                                                                                                                                                                                                                                                                                                                                                                                                                                                                                                                                                                                                                                                                                                                                                                                                                                                                                                                                                                           |
|----------------------------------------------------------------------------------------------------------------------------------------------------------------------------------------------------------------------------------------------------------------------------------------------------------------------------------------------------------------------------------------------------------------------------------------------------------------------------------------------------------------------------------------------------------------------------------------------------------------------------------------------------------------------------------------------------------------------------------------------------------------------------------------------------------------------------------------------------------------------------------------------------------------------------------------------------------------------------------------------------------------------------------------------------------------------------------------------------------------------------------------------------------------------------------------------------------------------------------------------------------------------------------------------------------------------------------------------------------------------------------------------------------------------------------------------------------------------------------|----------------------------------------------------------------------------------------------------------------------------------------------------------------------------------------------------------------------------------------------------------------------------------------------------------------------------------------------------------------------------------------------------------------------------------------------------------------------------------------------------------------------------------------------------------------------------------------------------------------------------------------------------------------------------------------------------------------------------------------------------------------------------------------------------------------------------------------------------------------------------------------------------------------------------------------------------------------------------------------------------------------------------------------------------------------------------------------------------------------------------------------------------------------------------------------------------------------------------------------------------------------------------------------------------------------------------------------------------------------------------------------------------------------|-------------------------------------------------------------------------------------------------------------------------------------------------------------------------------------------------------------------------------------------------------------------------------------------------------------------------------------------------------------------------------------------------------------------------------------------------------------------------------------------------------------------------------------------------------------------------------------------------------------------------------------------------------------------------------------------------------------------------------------------------------------------------------------------------------------------------------------------------------------------------------------------------------------------------------------------------------------------------------------------------------------------------------------------------------------------------------------------------------------------------------------------------------------------------------------------------------------------------------------------------------------------------------------------------------------------------------------------|
| <b>E'-QH-A</b><br>N -3.092243 0.940929 -1.661573<br>C -1.803030 1.048394 -1.435347<br>N -1.156982 0.674550 -0.305544<br>C -1.935839 0.145991 0.699274<br>C -3.325327 -0.010596 0.508134<br>C -3.896215 0.402462 -0.702284<br>N -1.580545 -0.275927 1.920227<br>C -2.779987 -0.683223 2.437700<br>N -3.857257 -0.553958 1.653667<br>H -2.843716 -1.089443 3.438800<br>N -5.207250 0.295209 -0.973722<br>H -5.842605 -0.065924 -0.281009<br>H -5.571416 0.642351 -1.846577<br>C 0.717820 2.171206 0.105639<br>C 2.069937 2.382060 0.254353<br>C 0.272780 0.870476 -0.167770<br>C 3.023536 1.321758 0.162036<br>O 2.602815 3.617462 0.526720<br>C 1.151036 -0.211377 -0.292419<br>C 2.529384 0.018476 -0.122477<br>O 4.271264 1.626690 0.351996<br>H 3.561434 3.406205 0.588374<br>C 0.622631 -1.596954 -0.643959<br>C 3.543768 -1.100909 -0.164458<br>C 1.581139 -2.709623 -0.172048<br>C 0.327005 -1.711632 -2.151858<br>H -0.324069 -1.745389 -0.116953<br>C 2.996973 -2.430199 -0.691003<br>H 3.942200 -1.240119 0.849548<br>H 4.404980 -0.784558 -0.761060<br>C 1.547841 -2.874235 1.351888<br>H 1.231843 -3.648965 -0.616353<br>H -0.037421 -2.714602 -2.394619<br>H 1.221412 -1.519031 -2.748567<br>H -0.435399 -0.995868 -2.463964<br>H 3.668538 -3.246234 -0.405306<br>H 2.980400 -2.412787 -1.784768<br>H 0.544927 -3.150208 1.689339<br>H 1.824167 -1.947542 1.861243<br>H 2.241474 -3.656355 1.674956<br>H -1.168993 1.472047 -2.203722<br>H 0.008837 2.985128 0.207111 | <b>Eq'-QH-A</b><br>N 2.991012 -1.072059 -1.649066<br>C 1.700086 -1.142062 -1.419196<br>N 1.070097 -0.755413 -0.284199<br>C 1.867228 -0.248086 0.717488<br>C 3.259873 -0.133179 0.522372<br>C 3.814341 -0.562030 -0.690403<br>N 1.526415 0.192286 1.936129<br>C 2.738731 0.566458 2.449095<br>N 3.809952 0.400329 1.663824<br>H 2.816461 0.976817 3.447480<br>N 5.127488 -0.499151 -0.963526<br>H 5.772703 -0.132250 -0.283085<br>H 5.475025 -0.826217 -1.850766<br>C -0.866431 -2.192232 0.092871<br>C -2.227660 -2.350515 0.227061<br>C -0.363445 -0.903989 -0.141330<br>C -3.141243 -1.251206 0.153579<br>O -2.811518 -3.571108 0.455968<br>C -1.200272 0.210311 -0.230526<br>C -2.583167 0.035377 -0.070416<br>O -4.402886 -1.512213 0.305270<br>H -3.762495 -3.327168 0.509269<br>C -0.641455 1.583146 -0.560549<br>C -3.512691 1.222604 -0.094613<br>C -1.504141 2.703658 -0.015537<br>C -0.474656 1.747357 -2.090578<br>H 0.350635 1.679755 -0.111487<br>C -2.815312 2.528290 0.160071<br>H -4.301237 1.066202 0.648746<br>H -4.049648 1.267454 -1.055793<br>C -0.806989 4.006953 0.260143<br>H -0.082655 2.737059 -2.338811<br>H -1.439482 1.624379 -2.588772<br>H 0.215216 1.002245 -2.492970<br>H -3.426718 3.358125 0.506539<br>H -0.287561 4.378485 -0.629970<br>H -0.043789 3.880049 1.036616<br>H -1.508943 4.775555 0.590261<br>H 1.050565 -1.541668 -2.187579<br>H -0.194383 -3.039322 0.171101 | <b>Eqn'-QH-A</b><br>N 2.809210 0.141012 -1.929250<br>C 1.554083 -0.105805 -1.634356<br>N 1.070004 -0.413983 -0.408468<br>C 1.989561 -0.505763 0.610007<br>C 3.354143 -0.254381 0.354945<br>C 3.751532 0.080667 -0.945815<br>N 1.797536 -0.781684 1.906754<br>C 3.070003 -0.694110 2.404227<br>N 4.042144 -0.384198 1.538193<br>H 3.269491 -0.870172 3.453208<br>N 5.022714 0.348720 -1.282947<br>H 5.752273 0.315472 -0.589665<br>H 5.253023 0.587185 -2.234346<br>C -0.684135 -2.036873 -0.278977<br>C -2.002870 -2.439194 -0.188807<br>C -0.340640 -0.688745 -0.222770<br>C -3.061490 -1.509077 -0.073233<br>O -2.363948 -3.765130 -0.240949<br>C -1.318844 0.332735 -0.063890<br>C -2.693594 -0.111558 -0.022290<br>O -4.270613 -1.951571 -0.028353<br>H -3.340117 -3.717944 -0.181720<br>C -1.054123 1.748692 0.061540<br>C -3.729179 0.843833 0.063736<br>C -2.112055 2.649283 0.123075<br>C 0.355961 2.288506 0.173203<br>C -3.450968 2.183838 0.113028<br>H -4.749382 0.481037 0.083006<br>C -1.894962 4.144590 0.218958<br>H 0.348476 3.325845 0.498073<br>H 0.896342 2.257963 -0.777194<br>H 0.942347 1.731590 0.903707<br>H -4.258059 2.906963 0.163213<br>H -1.255095 4.520621 -0.583729<br>H -1.426680 4.431795 1.165922<br>H -2.850277 4.667882 0.155050<br>H 0.809682 -0.057202 -2.419045<br>H 0.098651 -2.776310 -0.407518 |
| <b>E'-QH<sub>2</sub>-G</b><br>C 0.725719 1.908187 0.779586<br>C 1.970695 2.412039 0.445330<br>C 2.941926 1.547885 -0.070672<br>C 2.681118 0.191608 -0.282227<br>C 1.410005 -0.322735 0.035934<br>C 0.463684 0.557161 0.573163<br>O 2.246621 3.736028 0.639722<br>O 4.153663 2.140203 -0.323253<br>C 3.809706 -0.686808 -0.781163<br>C 3.378319 -2.104810 -1.170175<br>C 2.328890 -2.667815 -0.205351<br>C 1.068344 -1.780715 -0.228943<br>C 0.283746 -1.926519 -1.546783<br>C 2.874602 -2.830687 1.218064<br>N -3.753666 0.631279 -1.226901<br>C -4.653999 0.010594 -0.390403<br>N -4.319189 -0.521704 0.760149<br>C -2.997775 -0.422112 1.066913<br>C -2.035504 0.198907 0.267132<br>C -2.371369 0.782084 -0.986348<br>N -2.415723 -0.911309 2.210087<br>C -1.134135 -0.593353 2.103460<br>N -0.834530 0.072917 0.954890<br>O -1.653429 1.344011 -1.811951<br>N -5.939015 -0.081135 -0.838505<br>H -0.031514 2.559246 1.196591                                                                                                                                                                                                                                                                                                                                                                                                                                                                                                                                                  | <b>Eq'-QH<sub>2</sub>-G</b><br>C -0.842881 -1.980992 0.766689<br>C -2.098561 -2.435869 0.402326<br>C -3.042723 -1.528633 -0.095079<br>C -2.741177 -0.173798 -0.235538<br>C -1.458679 0.287021 0.101767<br>C -0.536941 -0.631966 0.608935<br>O -2.411159 -3.758074 0.541287<br>O -4.257536 -2.086464 -0.403178<br>C -3.800680 0.791740 -0.714247<br>C -3.508474 2.216440 -0.331880<br>C -2.284964 2.658011 -0.040259<br>C -1.087472 1.735829 -0.143174<br>C -0.419701 1.892692 -1.531066<br>C -1.999836 4.080320 0.350338<br>N 3.639341 -0.639851 -1.280463<br>C 4.562838 -0.074534 -0.429865<br>N 4.258219 0.390413 0.757709<br>C 2.943408 0.281011 1.088274<br>C 1.958619 -0.283618 0.274398<br>C 2.262456 -0.798296 -1.016590<br>N 2.391433 0.701515 2.272998<br>C 1.105563 0.398384 2.177512<br>N 0.775198 -0.195345 0.997524<br>O 1.522334 -1.311890 -1.854083<br>N 5.837689 0.035957 -0.901551<br>H -0.107899 -2.670486 1.161015                                                                                                                                                                                                                                                                                                                                                                                                                                                                          | <b>Eqn'-QH<sub>2</sub>-G</b><br>C 0.047276 2.397771 0.226110<br>C -1.322112 1.779065 0.057817<br>H 0.044513 3.431928 -0.106634<br>H 0.803065 1.876332 -0.358515<br>H 0.377000 2.395251 1.267952<br>C -1.539375 0.357984 0.151312<br>C -2.394766 2.621054 -0.221392<br>C -3.682420 2.081406 -0.447337<br>C -2.851095 -0.164373 -0.142515<br>C -0.558988 -0.613334 0.527076<br>C -2.244697 4.123840 -0.298230<br>C -3.908049 0.732650 -0.426251<br>C -0.827163 -1.962289 0.551810<br>H -4.505086 2.757712 -0.648914<br>C -3.084472 -1.563640 -0.140738<br>H -1.796765 4.536705 0.609038<br>H -3.219887 4.593298 -0.432529<br>H -1.613876 4.427490 -1.139156<br>N 0.767466 -0.255138 0.945750<br>C -2.088733 -2.453586 0.197438<br>H -4.910449 0.362696 -0.603316<br>H -0.051412 -2.658825 0.842752<br>O -4.305840 -2.125536 -0.422151<br>C 1.934233 -0.285241 0.194057<br>C 1.148535 0.070484 2.210868<br>H 0.424089 0.148382 3.007139                                                                                                                                                                                                                                                                                                                                                                                                      |

|                                                                                                                                                                                                                                                                                                                                                                                                                                                                                                                                                                                                                                                                                                                                                                                                                                                                                                                                                                                                                                                                                                                                                                                                                                                                                                                                                                                                                                                                                                                               |                                                                                                                                                                                                                                                                                                                                                                                                                                                                                                                                                                                                                                                                                                                                                                                                                                                                                                                                                                                                                                                                                                                                                                                                                                                                                                                                                                                                                            |                                                                                                                                                                                                                                                                                                                                                                                                                                                                                                                                                                                                                                                                                                                                                                                                                                                                                                                                                                                                                                                                                                                                                                                                                                                                                                                                                                                         |
|-------------------------------------------------------------------------------------------------------------------------------------------------------------------------------------------------------------------------------------------------------------------------------------------------------------------------------------------------------------------------------------------------------------------------------------------------------------------------------------------------------------------------------------------------------------------------------------------------------------------------------------------------------------------------------------------------------------------------------------------------------------------------------------------------------------------------------------------------------------------------------------------------------------------------------------------------------------------------------------------------------------------------------------------------------------------------------------------------------------------------------------------------------------------------------------------------------------------------------------------------------------------------------------------------------------------------------------------------------------------------------------------------------------------------------------------------------------------------------------------------------------------------------|----------------------------------------------------------------------------------------------------------------------------------------------------------------------------------------------------------------------------------------------------------------------------------------------------------------------------------------------------------------------------------------------------------------------------------------------------------------------------------------------------------------------------------------------------------------------------------------------------------------------------------------------------------------------------------------------------------------------------------------------------------------------------------------------------------------------------------------------------------------------------------------------------------------------------------------------------------------------------------------------------------------------------------------------------------------------------------------------------------------------------------------------------------------------------------------------------------------------------------------------------------------------------------------------------------------------------------------------------------------------------------------------------------------------------|-----------------------------------------------------------------------------------------------------------------------------------------------------------------------------------------------------------------------------------------------------------------------------------------------------------------------------------------------------------------------------------------------------------------------------------------------------------------------------------------------------------------------------------------------------------------------------------------------------------------------------------------------------------------------------------------------------------------------------------------------------------------------------------------------------------------------------------------------------------------------------------------------------------------------------------------------------------------------------------------------------------------------------------------------------------------------------------------------------------------------------------------------------------------------------------------------------------------------------------------------------------------------------------------------------------------------------------------------------------------------------------------|
| H 3.157065 3.902293 0.358077<br>H 4.574427 -0.738505 0.003950<br>H 4.294326 -0.221025 -1.647401<br>H 4.257413 -2.754125 -1.193833<br>H 2.970257 -2.095594 -2.183711<br>H 2.034048 -3.658324 -0.567809<br>H 0.413785 -2.129788 0.573551<br>H 0.049761 -2.978654 -1.731775<br>H 0.855297 -1.546846 -2.396362<br>H -0.654475 -1.372740 -1.508348<br>H 2.130162 -3.305133 1.863330<br>H 3.132085 -1.867268 1.666466<br>H 3.773267 -3.453880 1.222221<br>H -4.071540 0.997522 -2.116254<br>H -0.368671 -0.819503 2.830081<br>H -6.614794 -0.359038 -0.142319<br>H -6.272252 0.591609 -1.512696<br>H 4.767528 1.520031 -0.733051                                                                                                                                                                                                                                                                                                                                                                                                                                                                                                                                                                                                                                                                                                                                                                                                                                                                                                    | H -3.317500 -3.891923 0.230386<br>H -4.774709 0.512685 -0.294756<br>H -3.916487 0.713965 -1.805423<br>H -4.354689 2.896083 -0.303584<br>H -0.355640 2.044741 0.607242<br>H -0.146631 2.934729 -1.712010<br>H -1.107754 1.574861 -2.318044<br>H 0.483463 1.285592 -1.600323<br>H -1.569231 4.123906 1.356924<br>H -2.905526 4.689303 0.335613<br>H -1.268097 4.537500 -0.324017<br>H 3.935158 -0.956918 -2.195918<br>H 0.358175 0.585777 2.933471<br>H 6.531583 0.268087 -0.206422<br>H 6.150017 -0.596770 -1.622904<br>H -4.841271 -1.450995 -0.832210                                                                                                                                                                                                                                                                                                                                                                                                                                                                                                                                                                                                                                                                                                                                                                                                                                                                     | O -2.302674 -3.800284 0.208999<br>H -4.802267 -1.590145 -1.051728<br>C 2.179571 -0.519737 -1.186890<br>C 2.962601 0.054550 1.075107<br>N 2.451779 0.272795 2.331640<br>H -3.210749 -3.963157 -0.084509<br>N 4.273843 0.165114 0.733780<br>O 1.388982 -0.781982 -2.092013<br>N 3.560534 -0.403609 -1.450685<br>C 4.531209 -0.077515 -0.529539<br>H 3.825797 -0.580127 -2.412232<br>N 5.817756 -0.063488 -0.978627<br>H 6.486449 0.359551 -0.352317<br>H 5.996862 0.081080 -1.960927                                                                                                                                                                                                                                                                                                                                                                                                                                                                                                                                                                                                                                                                                                                                                                                                                                                                                                      |
| <b>E'-QH<sub>2</sub>-A</b><br>N -3.107085 0.976532 -1.647179<br>C -1.820485 1.084700 -1.426923<br>N -1.173465 0.691446 -0.301088<br>C -1.946931 0.149215 0.701246<br>C -3.336062 -0.003685 0.512603<br>C -3.910040 0.424312 -0.691242<br>N -1.582707 -0.290150 1.911084<br>C -2.780541 -0.705296 2.429539<br>N -3.860694 -0.564247 1.652731<br>H -2.838570 -1.126650 3.424533<br>N -5.218667 0.320666 -0.963672<br>H -5.854805 -0.050667 -0.276745<br>H -5.582721 0.676982 -1.833118<br>C 0.710151 2.153511 0.114694<br>C 2.071003 2.366800 0.261796<br>C 0.256161 0.868596 -0.161965<br>C 2.948127 1.283950 0.148909<br>O 2.538934 3.620869 0.531266<br>C 1.111744 -0.229242 -0.298457<br>C 2.490955 -0.007546 -0.131086<br>O 4.267871 1.599771 0.345500<br>H 3.501744 3.576195 0.614318<br>C 0.572404 -1.607379 -0.649711<br>C 3.503180 -1.132749 -0.180451<br>C 1.526751 -2.724552 -0.179716<br>C 0.270864 -1.712161 -2.157333<br>H -0.371239 -1.745589 -0.116588<br>C 2.940855 -2.456917 -0.707038<br>H 3.901188 -1.280034 0.831559<br>H 4.356659 -0.843209 -0.804594<br>C 1.497294 -2.890590 1.344186<br>H 1.172029 -3.659849 -0.625498<br>H -0.105272 -2.710525 -2.397080<br>H 1.163990 -1.528235 -2.758194<br>H -0.485964 -0.988701 -2.464354<br>H 3.611550 -3.271475 -0.421229<br>H 2.923677 -2.435592 -1.799467<br>H 0.494972 -3.166015 1.681826<br>H 1.773897 -1.966840 1.859331<br>H 2.190666 -3.674049 1.662974<br>H -1.190020 1.520335 -2.191821<br>H 0.015773 2.976487 0.223909<br>H 4.833752 0.826784 0.238676 | <b>Eq'-QH<sub>2</sub>-A</b><br>N 3.001313 -1.131256 -1.626407<br>C 1.712682 -1.200218 -1.402612<br>N 1.081770 -0.786215 -0.274844<br>C 1.873830 -0.257962 0.721117<br>C 3.266052 -0.149059 0.529011<br>C 3.823318 -0.599849 -0.674740<br>N 1.524013 0.209578 1.925129<br>C 2.734351 0.595127 2.436322<br>N 3.809031 0.410571 1.660562<br>H 2.806937 1.028153 3.425344<br>N 5.133451 -0.536998 -0.950564<br>H 5.780785 -0.168406 -0.272652<br>H 5.483130 -0.892054 -1.826387<br>C -0.872401 -2.173782 0.106967<br>C -2.243635 -2.324286 0.235992<br>C -0.352230 -0.905937 -0.132816<br>C -3.071566 -1.198871 0.146469<br>O -2.772638 -3.562451 0.461345<br>C -1.157773 0.229297 -0.235922<br>C -2.542612 0.074411 -0.074399<br>O -4.407677 -1.464079 0.295060<br>H -3.732905 -3.475535 0.539830<br>C -0.578499 1.587328 -0.576595<br>C -3.457450 1.276615 -0.108835<br>C -1.422202 2.722167 -0.032971<br>C -0.416693 1.734803 -2.109317<br>H 0.414981 1.667360 -0.130468<br>H -4.244226 1.168234 0.648283<br>H -3.983207 1.322872 -1.073857<br>C -0.703396 4.012765 0.239790<br>H -0.004295 2.714359 -2.361294<br>H -1.384933 1.630408 -2.604358<br>H 0.256750 0.973421 -2.508402<br>H -3.337399 3.403818 0.492352<br>H -0.179301 4.371718 -0.652303<br>H 0.057359 3.871249 1.015435<br>H -1.391709 4.793206 0.569023<br>H 1.067075 -1.618153 -2.164891<br>H -0.221598 -3.033962 0.195456<br>H -4.936544 -0.660207 0.240997 | <b>Eqn'-QH<sub>2</sub>-A</b><br>N 2.844422 0.104395 -1.927077<br>C 1.585062 -0.123420 -1.651220<br>N 1.085796 -0.414582 -0.424338<br>C 1.988527 -0.507374 0.609624<br>C 3.357564 -0.270765 0.370218<br>C 3.775201 0.045377 -0.929130<br>N 1.771549 -0.770835 1.902651<br>C 3.038631 -0.691521 2.419047<br>N 4.025294 -0.398246 1.564712<br>H 3.220314 -0.861038 3.472069<br>N 5.050146 0.296374 -1.255199<br>H 5.772357 0.264861 -0.553825<br>H 5.293025 0.521291 -2.207020<br>C -0.668326 -2.011347 -0.308200<br>C -2.004245 -2.413253 -0.197826<br>C -0.324725 -0.681708 -0.245839<br>C -2.985064 -1.453866 -0.067161<br>O -2.300894 -3.743035 -0.240025<br>C -1.287853 0.358894 -0.068332<br>C -2.663536 -0.072558 -0.030028<br>O -4.270162 -1.931926 -0.022599<br>H -3.257064 -3.843374 -0.126759<br>C -0.996982 1.764237 0.057552<br>C -3.691825 0.897094 0.035746<br>C -2.043871 2.679262 0.113976<br>C 0.417766 2.286501 0.170400<br>C -3.384337 2.228594 0.087344<br>H -4.732594 0.598150 0.019209<br>C -1.810161 4.169922 0.210334<br>H 0.417847 3.323340 0.494449<br>H 0.953447 2.251130 -0.781624<br>H 0.996602 1.725104 0.902251<br>H -4.183255 2.960375 0.118579<br>H -1.160870 4.534240 -0.589503<br>H -1.343223 4.447524 1.160186<br>H -2.757911 4.704897 0.141308<br>H 0.852257 -0.074890 -2.446917<br>H 0.099401 -2.762074 -0.444546<br>H -4.853287 -1.334002 0.458868 |
| <b>E'-QH<sub>2</sub>-GH<sup>+</sup></b><br>C 0.722690 1.883087 0.815297<br>C 1.957121 2.413524 0.484657<br>C 2.941997 1.573232 -0.047004<br>C 2.705802 0.215451 -0.277574<br>C 1.445715 -0.327757 0.036470<br>C 0.489772 0.530435 0.588676<br>O 2.209057 3.737773 0.696582                                                                                                                                                                                                                                                                                                                                                                                                                                                                                                                                                                                                                                                                                                                                                                                                                                                                                                                                                                                                                                                                                                                                                                                                                                                    | <b>Eq'-QH<sub>2</sub>-GH<sup>+</sup></b><br>C -0.839399 -1.965534 0.792263<br>C -2.085968 -2.445103 0.429809<br>C -3.044302 -1.558055 -0.079342<br>C -2.766720 -0.199522 -0.233241<br>C -1.493838 0.288437 0.102326<br>C -0.561886 -0.612502 0.620223<br>O -2.375545 -3.769341 0.581365                                                                                                                                                                                                                                                                                                                                                                                                                                                                                                                                                                                                                                                                                                                                                                                                                                                                                                                                                                                                                                                                                                                                    | <b>Eqn'-QH<sub>2</sub>-GH<sup>+</sup></b><br>C 0.005510 2.409511 0.220664<br>C -1.359798 1.782175 0.049866<br>H -0.002963 3.442952 -0.113263<br>H 0.765905 1.896929 -0.365995<br>H 0.333212 2.413829 1.263069<br>C -1.571015 0.360800 0.149429<br>C -2.435185 2.617400 -0.237359                                                                                                                                                                                                                                                                                                                                                                                                                                                                                                                                                                                                                                                                                                                                                                                                                                                                                                                                                                                                                                                                                                        |

|                                                                                                                                                                                                                                                                                                                                                                                                                                                                                                                                                                                                                                                                                                                                                                                                                                                                                                                                                                                                                                                                                                                                                                                                                                                                                                                                |                                                                                                                                                                                                                                                                                                                                                                                                                                                                                                                                                                                                                                                                                                                                                                                                                                                                                                                                                                                                                                                                                                                                                                                                                                                    |                                                                                                                                                                                                                                                                                                                                                                                                                                                                                                                                                                                                                                                                                                                                                                                                                                                                                                                                                                                                                                                                                                                                                                                       |
|--------------------------------------------------------------------------------------------------------------------------------------------------------------------------------------------------------------------------------------------------------------------------------------------------------------------------------------------------------------------------------------------------------------------------------------------------------------------------------------------------------------------------------------------------------------------------------------------------------------------------------------------------------------------------------------------------------------------------------------------------------------------------------------------------------------------------------------------------------------------------------------------------------------------------------------------------------------------------------------------------------------------------------------------------------------------------------------------------------------------------------------------------------------------------------------------------------------------------------------------------------------------------------------------------------------------------------|----------------------------------------------------------------------------------------------------------------------------------------------------------------------------------------------------------------------------------------------------------------------------------------------------------------------------------------------------------------------------------------------------------------------------------------------------------------------------------------------------------------------------------------------------------------------------------------------------------------------------------------------------------------------------------------------------------------------------------------------------------------------------------------------------------------------------------------------------------------------------------------------------------------------------------------------------------------------------------------------------------------------------------------------------------------------------------------------------------------------------------------------------------------------------------------------------------------------------------------------------|---------------------------------------------------------------------------------------------------------------------------------------------------------------------------------------------------------------------------------------------------------------------------------------------------------------------------------------------------------------------------------------------------------------------------------------------------------------------------------------------------------------------------------------------------------------------------------------------------------------------------------------------------------------------------------------------------------------------------------------------------------------------------------------------------------------------------------------------------------------------------------------------------------------------------------------------------------------------------------------------------------------------------------------------------------------------------------------------------------------------------------------------------------------------------------------|
| O 4.139289 2.191242 -0.295491<br>C 3.848189 -0.633776 -0.794470<br>C 3.442081 -2.053433 -1.203858<br>C 2.406440 -2.650367 -0.244823<br>C 1.129164 -1.786910 -0.252283<br>C 0.346214 -1.924062 -1.572129<br>C 2.958366 -2.823683 1.174941<br>N -3.741609 0.684150 -1.219957<br>C -4.667746 0.053496 -0.462779<br>N -4.267768 -0.534001 0.679008<br>C -2.939292 -0.474357 1.048875<br>C -2.000944 0.175655 0.269395<br>C -2.336766 0.812685 -0.963148<br>N -2.397116 -1.009694 2.161793<br>C -1.106342 -0.687170 2.076627<br>N -0.806529 0.020826 0.958251<br>O -1.633251 1.399173 -1.760193<br>N -5.936581 0.016150 -0.843664<br>H -0.044657 2.513914 1.244418<br>H 3.115226 3.926176 0.414689<br>H 4.616643 -0.682656 -0.012955<br>H 4.319798 -0.145157 -1.655088<br>H 4.332962 -2.685679 -1.239076<br>H 3.031465 -2.036799 -2.216200<br>H 2.128516 -3.640410 -0.621108<br>H 0.483939 -2.164673 0.544672<br>H 0.140832 -2.977541 -1.780378<br>H 0.904644 -1.508823 -2.413418<br>H -0.608918 -1.400194 -1.522032<br>H 2.224300 -3.320647 1.815042<br>H 3.200249 -1.862610 1.636854<br>H 3.867829 -3.430767 1.167558<br>H -4.045718 1.118631 -2.084307<br>H -0.350988 -0.943569 2.802373<br>H -6.641457 -0.441284 -0.284941<br>H -6.238925 0.468516 -1.693145<br>H 4.766751 1.588591 -0.711104<br>H -4.930798 -1.018845 1.271723 | O -4.245501 -2.140275 -0.385960<br>C -3.841038 0.741704 -0.726344<br>C -3.575812 2.175106 -0.357590<br>C -2.361524 2.641940 -0.067653<br>C -1.147186 1.740419 -0.159409<br>C -0.482047 1.892464 -1.549012<br>C -2.102218 4.072373 0.310532<br>N 3.631703 -0.674802 -1.280899<br>C 4.577791 -0.102489 -0.502081<br>N 4.206391 0.403231 0.687471<br>C 2.885955 0.323204 1.081418<br>C 1.926625 -0.263401 0.277660<br>C 2.232393 -0.814347 -1.003173<br>N 2.371639 0.780360 2.241333<br>C 1.076996 0.473602 2.161398<br>N 0.748352 -0.151468 1.001840<br>O 1.507980 -1.341264 -1.822968<br>N 5.837551 -0.041787 -0.909029<br>H -0.093633 -2.637358 1.196398<br>H -3.279702 -3.923056 0.272958<br>H -4.811708 0.449931 -0.307839<br>H -3.950275 0.650071 -1.816976<br>H -4.434357 2.839173 -0.337595<br>H -0.422871 2.073938 0.587670<br>H -0.234184 2.937853 -1.744816<br>H -1.160477 1.545630 -2.331714<br>H 0.437492 1.309066 -1.611010<br>H -1.675693 4.132609 1.317977<br>H -3.018513 4.664845 0.287626<br>H -1.376754 4.536294 -0.365945<br>H 3.915044 -1.051220 -2.178945<br>H 0.338385 0.684408 2.918493<br>H 6.561012 0.357175 -0.329569<br>H 6.118390 -0.434628 -1.794661<br>H -4.846563 -1.516336 -0.808280<br>H 4.882537 0.850143 1.295020 | C -3.719466 2.070398 -0.465105<br>C -2.879494 -0.170045 -0.144354<br>C -0.591430 -0.607786 0.529381<br>C -2.292271 4.120208 -0.322280<br>C -3.938837 0.721186 -0.436761<br>C -0.849617 -1.958562 0.560515<br>H -4.544318 2.741479 -0.674159<br>C -3.107577 -1.570395 -0.133922<br>H -1.850781 4.540402 0.584692<br>H -3.269024 4.583872 -0.463999<br>H -1.659119 4.421395 -1.162263<br>N 0.737530 -0.245008 0.951353<br>C -2.108266 -2.456222 0.208983<br>H -4.939698 0.348360 -0.616603<br>H -0.072075 -2.650498 0.857347<br>O -4.321554 -2.140840 -0.414580<br>C 1.899298 -0.282889 0.195697<br>C 1.115730 0.096576 2.208758<br>H 0.399077 0.186515 3.009573<br>O -2.316733 -3.802656 0.228796<br>H -4.849415 -1.583739 -0.997840<br>C 2.149815 -0.543134 -1.184890<br>C 2.901361 0.067461 1.079986<br>N 2.427662 0.302354 2.321535<br>H -3.224063 -3.973498 -0.062226<br>N 4.217931 0.156185 0.677719<br>O 1.379262 -0.822754 -2.080476<br>N 3.550919 -0.422758 -1.464959<br>C 4.540615 -0.089488 -0.605144<br>H 3.793541 -0.591951 -2.434926<br>N 5.796785 -0.006353 -1.017747<br>H 6.540024 0.252292 -0.385801<br>H 6.048709 -0.199452 -1.975277<br>H 4.931183 0.406994 1.351656 |
| <b>E'-QH<sub>2</sub>-AH<sup>+</sup></b><br>N -3.119848 0.840051 -1.707819<br>C -1.830541 0.935085 -1.499747<br>N -1.183375 0.579193 -0.362258<br>C -1.967595 0.095726 0.651192<br>C -3.349961 -0.027143 0.475516<br>C -3.939050 0.358447 -0.744245<br>N -1.574615 -0.294487 1.885399<br>C -2.692483 -0.657217 2.481638<br>N -3.795495 -0.522347 1.689822<br>H -2.759046 -1.026443 3.494688<br>N -5.244765 0.294289 -1.034663<br>H -5.939792 -0.047283 -0.392250<br>H -5.546702 0.609857 -1.945851<br>C 0.619899 2.131237 0.063199<br>C 1.961744 2.429125 0.235531<br>C 0.250657 0.815643 -0.204377<br>C 2.899171 1.389910 0.156167<br>O 2.338048 3.702416 0.495080<br>C 1.162224 -0.240586 -0.313832<br>C 2.523373 0.070258 -0.116862<br>O 4.187106 1.786441 0.382528<br>H 3.299245 3.734586 0.598554<br>C 0.719309 -1.659031 -0.661618<br>C 3.603881 -0.994664 -0.120991<br>C 1.728968 -2.716111 -0.151647<br>C 0.456789 -1.811261 -2.175921<br>H -0.226723 -1.855591 -0.145691<br>C 3.142207 -2.362775 -0.638073<br>H 3.984050 -1.099346 0.903869<br>H 4.455194 -0.664533 -0.730399<br>C 1.657602 -2.895904 1.371788<br>H 1.450265 -3.670936 -0.610776                                                                                                                                                                       | <b>Eq'-QH<sub>2</sub>-AH<sup>+</sup></b><br>N 2.990315 -1.159305 -1.627955<br>C 1.702327 -1.219959 -1.414598<br>N 1.066752 -0.781890 -0.298885<br>C 1.856522 -0.242990 0.681744<br>C 3.235447 -0.144328 0.495266<br>C 3.821113 -0.619043 -0.695258<br>N 1.468459 0.245362 1.882982<br>C 2.600543 0.649168 2.446332<br>N 3.687378 0.440734 1.662135<br>H 2.680000 1.098896 3.423478<br>N 5.119957 -0.583977 -0.979896<br>H 5.808100 -0.201105 -0.351627<br>H 5.433972 -0.953802 -1.865390<br>C -0.874876 -2.176849 0.108408<br>C -2.243772 -2.332420 0.251580<br>C -0.368812 -0.906017 -0.144035<br>C -3.077278 -1.209495 0.165181<br>O -2.764070 -3.569434 0.489302<br>C -1.176257 0.226691 -0.248409<br>C -2.558189 0.065059 -0.069791<br>O -4.407345 -1.479860 0.339346<br>H -3.725903 -3.490501 0.559687<br>C -0.608798 1.584408 -0.609750<br>C -3.479188 1.261972 -0.101275<br>C -1.451010 2.718729 -0.062690<br>C -0.470180 1.717450 -2.145547<br>H 0.390693 1.679655 -0.179907<br>C -2.759496 2.560521 0.134800<br>H -4.255667 1.152783 0.665310<br>H -4.015227 1.298858 -1.060891<br>C -0.734882 4.014679 0.190650<br>H -0.069368 2.697606 -2.412228                                                                                        | <b>Eqn'-QH<sub>2</sub>-AH<sup>+</sup></b><br>N 2.818492 0.171279 -1.942734<br>C 1.562414 -0.062517 -1.669939<br>N 1.068745 -0.378640 -0.447209<br>C 1.977242 -0.490681 0.569595<br>C 3.330931 -0.255059 0.328514<br>C 3.764271 0.095445 -0.966068<br>N 1.734916 -0.793543 1.865896<br>C 2.934126 -0.752211 2.434417<br>N 3.923827 -0.434283 1.563339<br>H 3.132824 -0.945543 3.476834<br>N 5.021348 0.355779 -1.311775<br>H 5.785691 0.323855 -0.656221<br>H 5.222447 0.596597 -2.271528<br>C -0.661427 -2.001448 -0.333114<br>C -1.990060 -2.422732 -0.221601<br>C -0.340625 -0.666463 -0.259344<br>C -2.984086 -1.476941 -0.079152<br>O -2.267537 -3.755021 -0.275527<br>C -1.313301 0.361253 -0.069688<br>C -2.682114 -0.091448 -0.029900<br>O -4.257627 -1.976042 -0.031237<br>H -3.221748 -3.872639 -0.162752<br>C -1.041756 1.768679 0.069239<br>C -3.723322 0.863184 0.049920<br>C -2.100984 2.667899 0.137782<br>C 0.365533 2.310991 0.183060<br>C -3.434993 2.198053 0.112467<br>H -4.760468 0.551601 0.036813<br>C -1.888491 4.160462 0.247743<br>H 0.350624 3.344694 0.515847<br>H 0.900730 2.295928 -0.769756<br>H 0.954593 1.758294 0.913450                             |

|                                 |                                |                                |
|---------------------------------|--------------------------------|--------------------------------|
| H 0.138669 -2.831946 -2.405378  | H -1.444794 1.600413 -2.624438 | H -4.244095 2.917737 0.154551  |
| H 1.349510 -1.593795 -2.765562  | H 0.203008 0.958217 -2.549300  | H -1.423043 4.434948 1.199183  |
| H -0.329182 -1.136851 -2.524706 | H -3.362470 3.393417 0.482827  | H -2.843980 4.682201 0.186679  |
| H 3.853093 -3.128485 -0.316518  | H 0.035713 3.883439 0.958394   | H -1.247015 4.541506 -0.550474 |
| H 3.164499 -2.365518 -1.731158  | H -1.423203 4.794146 0.521760  | H 0.827797 0.000911 -2.462625  |
| H 0.665006 -3.240178 1.675296   | H -0.223610 4.368737 -0.710605 | H 0.115162 -2.740613 -0.481500 |
| H 1.856694 -1.965202 1.909876   | H 1.060992 -1.649029 -2.173889 | H -4.863053 -1.368894 0.409212 |
| H 2.382663 -3.641649 1.708989   | H -0.218605 -3.032779 0.195928 | H 4.903392 -0.355024 1.800202  |
| H -1.201969 1.333993 -2.286816  | H -4.950645 -0.692814 0.218805 |                                |
| H -0.114857 2.921468 0.154846   | H 4.639013 0.676285 1.908585   |                                |
| H 4.809495 1.058109 0.283914    |                                |                                |
| H -4.741817 -0.742452 1.964539  |                                |                                |
